# Supplementary material for: Spliceosomal Intron Insertions in Genome Compacted Ray-Finned Fishes as Evident from Phylogeny of MC Receptors, Also Supported by a Few Other GPCRs
Source: PubMed Central journal article supplement (PMC3151243; doi:10.1371/journal.pone.0022046), 2011-08-05
Supplement: pone.0022046.s001.pdf [file pone.0022046.s001.pdf]

Figure S1.

|                    |                                                           |           |
|--------------------|-----------------------------------------------------------|-----------|
| MC1R-Human         | -----MAVQG----                                            | 5         |
| MC1R-Mouse         | -----MSTQE----                                            | 5         |
| MC1R-Rat           | -----MPTQG----                                            | 5         |
| MC1R-Opossum       | -----MPMPG----                                            | 5         |
| MC1R-Chicken       | -----MSMLA----                                            | 5         |
| MC1R-Zebrafinch    | -----MATLA----                                            | 5         |
| MC1R-AnoleLizard   | -----NATLA----                                            | 5         |
| MC1R-Xenopus       | -----                                                     | -         |
| MC1R-Takifugu      | -----YSTLT----                                            | 5         |
| MC1R-Tetraodon     | -----MEISNRSLHGS                                          | 11        |
| MC1R-Medaka        | -----LFE                                                  | 3         |
| MC1R-Sickleback    | -----MELTNRSL                                             | 9         |
| MC1R-Zebrafish     | -----MNDSSRHHF                                            | 9         |
| MC1R-Callorhinchus | -----                                                     | -         |
| MC2R-Human         | -----                                                     | -         |
| MC2R-Mouse         | -----                                                     | -         |
| MC2R-Rat           | -----MKHIIN----                                           | 6         |
| MC2R-Opossum       | -----                                                     | -         |
| MC2R-Chicken       | -----MSTEK----                                            | 5         |
| MC2R-Zebrafinch    | -----MSTER----                                            | 5         |
| MC2R-Turkey        | -----                                                     | -         |
| MC2R-AnoleLizard   | -----                                                     | -         |
| MC2R-Takifugu      | -----                                                     | -         |
| MC2R-Tetraodon     | -----                                                     | -         |
| MC2R-Sickleback    | -----                                                     | -         |
| MC2R-Medaka        | -----                                                     | -         |
| MC2R-Zebrafish     | -----                                                     | -         |
| MC3R-Human         | -----MNASCC----                                           | 6         |
| MC3R-Mouse         | -----MNSSCC----                                           | 6         |
| MC3R-Rat           | -----MNSSCC----                                           | 6         |
| MC3R-AnoleLizard   | -----                                                     | -         |
| MC3R-Xenopus       | -----MNTTN----                                            | 5         |
| MC3R-Zebrafinch    | -----                                                     | -         |
| MC3R-Turkey        | -----MNSTHF----                                           | 6         |
| MC4R-Xenopus       | -----MNFTHH---H                                           | 7         |
| MC3R-Zebrafish     | -----MNDSHL----                                           | 6         |
| MC3R-Callorhinchus | -----MNSTHF----                                           | 6         |
| MC4R-Human         | -----MVNSTH-RGM                                           | 9         |
| MC4R-Mouse         | -----MNSTHH-HGM                                           | 9         |
| MC4R-Rat           | -----MNSTHH-HGM                                           | 9         |
| MC4R-Opossum       | -----MNSTHYHGM                                            | 10        |
| MC4R-Chicken       | -----MNFTQH-RGT                                           | 9         |
| MC4R-Turkey        | -----MNFTQH-RGT                                           | 9         |
| MC4R-Zebrafinch    | -----MNFTQH-RGT                                           | 9         |
| MC4R-AnoleLizard   | -----MNFTYH-YRV                                           | 9         |
| MC4R-Takifugu      | -----                                                     | -         |
| MC4R-Tetraodon     | -----MNATD----                                            | 5         |
| MC4R-Sickleback    | -----MNSTQS--GG                                           | 8         |
| MC4R-Medaka        | -----MNSTLP----                                           | 6         |
| MC4R-Zebrafish     | -----MNTSHH----                                           | 6         |
| MC5R-Human         | -----MNSSFH----                                           | 6         |
| MC5R-Mouse         | <b>MQDQSPVNRNFNSQKPPGTREESCLPLRGAEQNGKSDAKKWHGSLPAMNS</b> | <b>50</b> |
| MC5R-Rat           | <b>-----SQKPPGTREESCLPLRGAEQNGKFEAKKWRHFLPAMNS</b>        | <b>38</b> |
| MC5R-Opossum       | -----MNSSIF----                                           | 6         |
| MC5R-Chicken       | -----MNTSSQ----                                           | 6         |
| MC5R-Zebrafinch    | -----                                                     | -         |
| MC5R-Turkey        | -----MNTSSQ----                                           | 6         |
| MC5R-Takifugu      | -----MNTSHRSSDPQEG----                                    | 13        |
| MC5R-Tetraodon     | -----MNATHGSSNPQEG----                                    | 13        |
| MC5R-Sickleback    | -----MNLSESSYREELLGN                                      | 17        |
| MC5R-Medaka        | -----TAPMEVTDKTNLSLHKAQL                                  | 18        |
| MC5Rb-Zebrafish    | -----MNSSEW----                                           | 6         |
| MC5Ra-Zebrafish    | -----MNTSET----                                           | 6         |
| MC5R-Callorhinchus | -----                                                     | -         |
| MCAR-Lampetra      | -----MNLSEA----                                           | 6         |
| MCAR_Lamprey       | -----                                                     | -         |
| MCBR-Lampetra      | -----MTFSAGGVGGV                                          | 11        |
| MCBR_Lamprey       | -----                                                     | -         |
| MCRL-Branchiostoma | -----                                                     | -         |

|                    |                                          |           |           |          |      |    |
|--------------------|------------------------------------------|-----------|-----------|----------|------|----|
| MC1R-Human         | -SQRRLLGSLNSTPTAI---PQLGLAANOTGARC-LEVSI | SDGLFSLGL | 50        |          |      |    |
| MC1R-Mouse         | -PQKSLGSLNSNA--T---SHLGLATNQSEPW         | -LYVSI    | PDGLFSLGL | 48       |      |    |
| MC1R-Rat           | -PPKRLGSLNSTSITT---SHLGLATNQGSWC-        | LHVSIP    | PDGLFSLGL | 50       |      |    |
| MC1R-Opossum       | -QQKRLFNSLNSTSPDT---LHQAVPTNQTDIS        | C-OGLF    | IPDEL     | FLLTGL   | 50   |    |
| MC1R-Chicken       | --PLRLLREPWNASE-G---NQSNATAGAGGAW        | C-OGLD    | IPNEL     | FLLTGL   | 48   |    |
| MC1R-Zebrafinch    | --PLRLLREPSNASE-G---NQSNATVGASAGR        | C-OGLD    | IPNEL     | FLLTGL   | 48   |    |
| MC1R-AnoleLizard   | -----G---NLSVNGTEGGNCSTDNPLMIPHE         | VFLILGA   | 36        |          |      |    |
| MC1R-Xenopus       | -----MLHSTVNSTNAT---INVGTELKPTNTSD-      | TVMDVPE   | ELFLLCV   | 41       |      |    |
| MC1R-Takifugu      | ---HTLLCPLIEFMDD---NETNITNGEQNLG         | C-VOIL    | IPEL      | FLLTGL   | 48   |    |
| MC1R-Tetraodon     | NILHMEFSPLIEFMEDN---ETNITNGDONTL         | G-C-VOTR  | IPEL      | FLLTGL   | 57   |    |
| MC1R-Medaka        | LKPLKILSQCFLEKYN---ETNSTAGERNLLG         | C-FOIR    | IPEL      | FLLTGL   | 49   |    |
| MC1R-Sickleback    | GPSIYHMELSPQDYFME---DNETNSTAGERNG        | C-VOIR    | IPEL      | FLLTGL   | 55   |    |
| MC1R-Zebrafish     | SMKHMDYMYNADNNITL---NSNSTASDINVT         | GI-AQIM   | IPEL      | FLLTGL   | 55   |    |
| MC1R-Callorhinchus | -----MSAVAC-QHVS                         | VPE       | EVFLSLGI  | 21       |      |    |
| MC2R-Human         | --MKHIINS-----YENINNTARNNSD              | C-PRVV    | LPE       | EFFI     | ISI  | 36 |
| MC2R-Mouse         | --MKHIINS-----YEHTNDTARNNSD              | C-PDVV    | LPE       | EFFI     | ISV  | 36 |
| MC2R-Rat           | -----S---YEHTNNTARNNSD                   | C-PDVV    | VPE       | EFFI     | ISI  | 36 |
| MC2R-Opossum       | -ERASELIKILGHNGNP---PENITDNATNNTD        | C-IOVV    | VPE       | EVFFA    | ISI  | 45 |
| MC2R-Chicken       | PFNLILSAHAGQTSIPS---LENITDFSLNITD        | C-NOVV    | VPE       | EVFFV    | VAA  | 51 |
| MC2R-Zebrafinch    | --PSILIKHPGQTSIPS---LENISDFSLNITD        | C-TOVV    | VPE       | EVFFV    | VAA  | 49 |
| MC2R-Turkey        | -----IKHAGQTSIPS---LENITDFSLNITD         | C-NOVV    | VPE       | EVFFV    | VAA  | 40 |
| MC2R-AnoleLizard   | -----VPE                                 | EFFI      | IAT       | 11       |      |    |
| MC2R-Takifugu      | -----SSKLQVLKFT---SLAMNATTVNRSD          | C-PEVN    | VPI       | HEFFI    | IGF  | 39 |
| MC2R-Tetraodon     | -----MDTAAANRSD                          | C-PEVR    | VPVPL     | EFFI     | IGV  | 26 |
| MC2R-Sickleback    | -----SN---FEVMNTNSVNRTD                  | C-PEVK    | VPFL      | EFFI     | IGI  | 31 |
| MC2R-Medaka        | -----M---NPSAESPSSIHTD                   | C-AEVO    | VP        | GOVFL    | VIAV | 30 |
| MC3R-Human         | --LPSVQPTLPNGSEHL---QAPFFSNQSSSAF        | C-EQVF    | IKPE      | EVFLSLGI | 50   |    |
| MC3R-Mouse         | --LSSVSPMLPNLSEHP---AAPASNRSGSGF         | C-EQVF    | IKPE      | EVFLALGI | 50   |    |
| MC3R-Rat           | --PSSSYPTLPNLSQHP---AAPSASNRSGSGF        | C-EQVF    | IKPE      | EVFLALGI | 50   |    |
| MC3R-AnoleLizard   | -----GVC-ELVFIKADVFLSLGI                 | 18        |           |          |      |    |
| MC3R-Xenopus       | VFSVQAVLANATLDP-N---ETLFLSNLSRIGF        | C-EQVL    | IKTE      | EVFLTGLI | 50   |    |
| MC3R-Zebrafinch    | -----TNRSGDGF                            | C-EQVF    | IKAE      | EVFLTGLI | 24   |    |
| MC3R-Turkey        | --AFSQPVLLNVTEDA---NDSILNRRSSDGF         | C-EQVF    | IKAE      | EVFLALGI | 50   |    |
| MC4R-Xenopus       | EPHHLHYRNHSRTVGAG---ANDTKEKGHSGG         | CYEOL     | FVSP      | EVFVILGI | 54   |    |
| MC3R-Zebrafish     | --QFLKGQKSVNSTSLP---PNGSLADSPAGT         | L-C-EQVO  | IQAE      | EVFLTGLI | 50   |    |
| MC3R-Callorhinchus | -----LFDLQLNGSGDL---NKSSILNRSNPGF        | C-EQVP    | IKS       | EVFLTGLI | 47   |    |
| MC4R-Human         | HTSLHLWNRSSYRLHSN---ASESLGKGYSDGG        | CYEOL     | FVSP      | EVFVTLGV | 56   |    |
| MC4R-Mouse         | YTSLHLWNRSSYGLHGN---ASESLGKHPDGG         | CYEOL     | FVSP      | EVFVTLGV | 56   |    |
| MC4R-Rat           | YTSLHLWNRSSHGLHGN---ASESLGKHSDDG         | CYEOL     | FVSP      | EVFVTLGV | 56   |    |
| MC4R-Opossum       | HPTLHFWNHNSYVLHS-S---ANDTIGKGYLDGG       | CYEOL     | FVSP      | EVFVTLGI | 56   |    |
| MC4R-Chicken       | LQPLHFWNHNSGLHR-G---ASEPSAKGHSSGG        | CYEOL     | FVSP      | EVFVTLGI | 55   |    |
| MC4R-Turkey        | LQPLHFWNHNSGLHR-G---ASEPSAKGHSSGG        | CYEOL     | FVSP      | EVFVTLGI | 55   |    |
| MC4R-Zebrafinch    | LQPLHFWNHNSYRLHG-G---ASERTVKGHSSGG       | CYEOL     | FVSP      | EVFVTLGI | 55   |    |
| MC4R-AnoleLizard   | HQHLDLWNHNSYRLRGA---MNRSLGKSYTSEG        | CYEOL     | FVSP      | EVFVTLGF | 56   |    |
| MC4R-Takifugu      | -----ESSTG                               | CYEOL     | LISTE     | EVFLTGLI | 22   |    |
| MC4R-Tetraodon     | PPGLIQDYNNGSQTLEA---DFPDEEKESAG          | CYEOL     | LISTE     | EVFLTGLI | 52   |    |
| MC4R-Sickleback    | LIQGYHNRSASGVSPD---NDLAAEGKASAG          | CYEOL     | LISTE     | EVFLTGLI | 55   |    |
| MC4R-Medaka        | ---YGSVPNRSLSSATL---PPDLGGQKDSAG         | CYEOL     | LISTE     | EVFLTGLI | 50   |    |
| MC4R-Zebrafish     | HGLHHSFRNHSQALPV---GKPSHGDRGSAG          | CYEOL     | LISTE     | EVFLTGLI | 53   |    |
| MC5R-Human         | ----LHFLDLNLNATEG---NLGPNVKNKSSP         | C-EDMG    | IAVE      | EVFLTGLV | 48   |    |
| MC5R-Mouse         | SSTLTVLNLTLNASE-D---GILGSNVKNKSLA        | C-EEMG    | IAVE      | EVFLTGLI | 95   |    |
| MC5R-Rat           | SSHTLLDLTLNASE-D---NILGQNVNKNSSA         | C-EDMG    | IAVE      | EVFLTGLI | 83   |    |
| MC5R-Opossum       | ----LHTLDLNLSSLGG---NMSGPMIKSSP          | C-EQV     | IAVE      | EVFLTGLI | 48   |    |
| MC5R-Chicken       | ----LYVSELNLSAFGS---NFTVPTVKSSP          | C-EQV     | VIAA      | EVFLTGLI | 48   |    |
| MC5R-Zebrafinch    | -----SPC-EQV                             | VIAA      | EVFLTGLI  | 18       |      |    |
| MC5R-Turkey        | ----LYVSELNLSAFGS---NFTVPTVKSSP          | C-EQV     | VIAA      | EVFLTGLI | 48   |    |
| MC5R-Takifugu      | IMGNSTWNPLSYQPNFT---LSPPLPKTKTAA         | C-EOL     | HIAI      | EVFLTGLI | 59   |    |
| MC5R-Tetraodon     | ILGNSTWNLSFHQPNS---LSPPLPKTKTAA          | C-EOL     | HIAI      | EVFLTGLI | 59   |    |
| MC5R-Sickleback    | FTLAYSYHHQNYTPVPP---LHPDKTGTSPAA         | C-EQV     | HIAI      | EVFLILGI | 63   |    |
| MC5R-Medaka        | ANSTWNFYQONYTIAPP---SLKDKTSPSAAA         | C-EQV     | HIAI      | EVFLILGI | 64   |    |
| MC5Rb-Zebrafish    | --PTLSPNSSLSQANLS---DESSRPKTSASA         | C-EQV     | HIAI      | EVFLTGLI | 50   |    |
| MC5Ra-Zebrafish    | --TLFPWGMHVNSSPASYILNATEPSSHNKPK         | A-C-EOL   | NIAI      | EVFLILGI | 53   |    |
| MC5R-Callorhinchus | -----LANVTAV---MNTSGFMNGSGG              | C-ROLE    | IPL       | EVFLILGG | 37   |    |
| MCAR-Lampetra      | LFPNPFVGTSGPDDN-G---TASASANRTRF          | S-C-HNFS  | IPT       | EVFLALGI | 51   |    |
| MCAR_Lamprey       | -----N-G---TAVASANRTRF                   | S-C-HNFS  | IPNE      | EVFLTGLI | 31   |    |
| MCBR-Lampetra      | VNNHHGANHQGGGNHS---GHGNATGGGHGR          | P-C-EQV   | LIP       | EVFLILGV | 57   |    |
| MCBR_Lamprey       | -----C-EQV                               | LIP       | EVFLILGV  | 16       |      |    |
| MCRL-Branchiostoma | -----VGA                                 | 3         |           |          |      |    |

|                    | TM1                                | TM2                 |     |
|--------------------|------------------------------------|---------------------|-----|
| MC1R-Human         | VSLVENALVVAITAKNRNLHSPMYCFICCLALS  | DLVSGSNVLETTAV-IL   | 99  |
| MC1R-Mouse         | VSLVENVLVVAITAKNRNLHSPMYCFICCLALS  | DLMVSIVLETTI-IL     | 97  |
| MC1R-Rat           | VSLVENVLVVAITAKNRNLHSPMYCFICCLALS  | DLMVSIVLETTI-IL     | 99  |
| MC1R-Opossum       | VSLVENMMVVAITAKNRNLHSPMYCFICCLALS  | DLVSVSNLLETISV-ML   | 99  |
| MC1R-Chicken       | VSLVENLLVVAITAKNRNLHSPMYCFICCLALS  | DMLVSVSNLAKTLF-ML   | 97  |
| MC1R-Zebrafinch    | VSLVENLLVVAITAKNRNLHSPMYCFICCLALS  | DMLVSVSNLAKTLF-ML   | 97  |
| MC1R-AnoleLizard   | ISFVENLLVVAITAKNRNLHSPMYCFICCLALS  | DMLVSVSNVVEITFF-ML  | 85  |
| MC1R-Xenopus       | FSLLENILVVAITAKNRNLHSPMYCFICCLALS  | DMLVSSSNLGETLI-IF   | 90  |
| MC1R-Takifugu      | ISLVENILVILAITAKNRNLHSPMYCFICCLALS | DMLVSVSNVVEITVF-ML  | 97  |
| MC1R-Tetraodon     | ISLVENILVILAITAKNRNLHSPMYCFICCLALS | DMLVSVSNVVEITVF-ML  | 106 |
| MC1R-Medaka        | ISLVENILVILAITAKNRNLHSPMYCFICCLALS | DMLVSVSNVVEITVF-ML  | 98  |
| MC1R-Sickleback    | ISLVENILVILAITAKNRNLHSPMYCFICCLALS | DMLVSVSNVVEITVF-ML  | 104 |
| MC1R-Zebrafish     | ISLVENILVVAITAKNRNLHSPMYCFICCLALS  | DMLVSVSNVVEITVF-ML  | 104 |
| MC1R-Callorhinchus | VSLVENILVVAITAKNRNLHSPMYCFICCLALS  | DMLVSVSNMVEITVF-LI  | 70  |
| MC2R-Human         | VGVLLENLIVLLAVFKNKNLQAPMYFFICSLAIS | DMLGSLYKILENLI-II   | 85  |
| MC2R-Mouse         | IGLLENLIVLLAVIKNKNLQSPMYFFICSLAIS  | DMLGSLYKILENLI-IM   | 85  |
| MC2R-Rat           | IGVLENLIVLLAVIKNKNLQSPMYFFICSLAIS  | DMLGSLYKILENLI-IM   | 85  |
| MC2R-Opossum       | IGVLENLIVLLAVIKNKNLHSPMYFFICSLAIS  | DMLGSLYKILENLI-II   | 94  |
| MC2R-Chicken       | AGLLENLIVLLAVIRNKNLHSPMYFFICSLAIS  | DMLGSLYKILENLI-II   | 100 |
| MC2R-Zebrafinch    | AGLLENLIVLLAVIRNKNLHSPMYFFICSLAIS  | DMLGSLYKILENLI-II   | 98  |
| MC2R-Turkey        | AGLLENLIVLLAVIRNKNLHSPMYFFICSLAIS  | DMLGSLYKILENLI-II   | 89  |
| MC2R-AnoleLizard   | LGLLENLIVLLAVGRNKNLHSPMYFFICSLAIS  | DMLGSLYKAVENIFYII   | 61  |
| MC2R-Takifugu      | VSLLLENLIVIGAVSWNRNLHSPMYCFIGSLA   | AFNTVASVTKTWENLM-IT | 88  |
| MC2R-Tetraodon     | -----                              | -----VM-IM          | 4   |
| MC2R-Sickleback    | VSLAENLLVVAIVIRNRNLHSPMYCFICSLA    | AFNTIASLTKTWENLM-IV | 75  |
| MC2R-Medaka        | VSLAENLLVVAIVIRNRNLHSPMYCFICSLA    | AFNTIASLTKTWENLM-IV | 80  |
| MC2R-Zebrafish     | ASLSENLLVVAIVIKNKNLHSPMYCFICNLA    | VNTISSFSKALENLI-LL  | 79  |
| MC3R-Human         | VSLLLENLIVLAVVRNKNLHSPMYFFICSLA    | ADMLVSVSNALETIM-IA  | 99  |
| MC3R-Mouse         | VSLMENILVILAVVRNKNLHSPMYFFICSLA    | ADMLVSVSNALETIM-IA  | 99  |
| MC3R-Rat           | VSLMENILVILAVVRNKNLHSPMYFFICSLA    | ADMLVSVSNALETIM-IV  | 99  |
| MC3R-AnoleLizard   | VGLLENLIVLAVIKNKNLHSPMYFFICSLA     | ADMLVSVSNALETIM-IV  | 67  |
| MC3R-Xenopus       | ISLLENLIVLAVIKNKNLHSPMYFFICSLA     | ADMLVSVSNALETIV-IA  | 99  |
| MC3R-Zebrafinch    | ISLLENLIVLAVIKNKNLHSPMYFFICSLA     | ADMLVSVSNALETIV-IA  | 73  |
| MC3R-Turkey        | ISLLENLIVLAVIKNKNLHSPMYFFICSLA     | ADMLVSVSNALETIV-IA  | 99  |
| MC4R-Xenopus       | VSLMENILVIAAIVSRNKNLHSPMYFFICSLA   | ADMLVSVSNGFETIV-IT  | 103 |
| MC3R-Zebrafish     | VSLLENLIVIAAIVKKNLHSPMYFFICSLA     | ADMLVSVSNALETIV-IA  | 99  |
| MC3R-Callorhinchus | ISLLENLIVLAVIKNKNLHSPMYFFICSLA     | ADMLVSVSNALETIV-MA  | 96  |
| MC4R-Human         | ISLLENLIVIAAIAKKNLHSPMYFFICSLA     | ADMLVSVSNGSETIV-IT  | 105 |
| MC4R-Mouse         | ISLLENLIVIAAIAKKNLHSPMYFFICSLA     | ADMLVSVSNGSETIV-IT  | 105 |
| MC4R-Rat           | ISLLENLIVIAAIAKKNLHSPMYFFICSLA     | ADMLVSVSNGSETIV-IT  | 105 |
| MC4R-Opossum       | ISLLENLIVIAAIAKKNLHSPMYFFICSLA     | ADMLVSVSNGSETIV-IT  | 105 |
| MC4R-Chicken       | ISLLENLIVIAAIAKKNLHSPMYFFICSLA     | ADMLVSVSNGSETIV-IT  | 104 |
| MC4R-Turkey        | ISLLENLIVIAAIAKKNLHSPMYFFICSLA     | ADMLVSVSNGSETIV-IT  | 104 |
| MC4R-Zebrafinch    | ISLLENLIVIAAIAKKNLHSPMYFFICSLA     | ADMLVSVSNGSETIV-IT  | 104 |
| MC4R-AnoleLizard   | VSLLLENLIVIAAIAKKNLHSPMYFFICSLA    | ADMLVSVSNGSETIV-IT  | 105 |
| MC4R-Takifugu      | ISLLENLIVIAAIVKNLHSPMYFFICSLA      | ADMLVSVSNASETIV-IA  | 71  |
| MC4R-Tetraodon     | VSLLLENLIVIAAIVKNLHSPMYFFICSLA     | ADMLVSVSNASETIV-IA  | 101 |
| MC4R-Sickleback    | ISLLENLIVIAAIVKNLHSPMYFFICSLA      | ADMLVSVSNASETIV-IA  | 104 |
| MC4R-Medaka        | ISLLENLIVIAAIVKNLHSPMYFFICSLA      | ADMLVSVSNASETIV-IA  | 99  |
| MC4R-Zebrafish     | VSLLLENLIVIAAIVKNLHSPMYFFICSLA     | ADMLVSVSNASETIV-MA  | 102 |
| MC5R-Human         | ISLLENLIVIGAVKKNLHSPMYFFVCSLA      | ADMLVSMSSAWETIT-IY  | 97  |
| MC5R-Mouse         | VSLLLENLIVIGAVKKNLHSPMYFFVCSLA     | ADMLVSMSSAWETIT-IY  | 144 |
| MC5R-Rat           | VSLLLENLIVIGAVKKNLHSPMYFFVCSLA     | ADMLVSMSSAWETIT-IY  | 132 |
| MC5R-Opossum       | VSLLLENLIVIGAVKKNLHSPMYFFVCSLA     | ADMLVSVSNAWETIT-IY  | 97  |
| MC5R-Chicken       | VSLLLENLIVIGAVKKNLHSPMYFFVCSLA     | ADMLVSVSNAWETIT-IY  | 97  |
| MC5R-Zebrafinch    | VSLLLENLIVIGAVKKNLHSPMYFFVCSLA     | ADMLVSVSNAWETIT-IY  | 67  |
| MC5R-Turkey        | VSLLLENLIVIGAVKKNLHSPMYFFVCSLA     | ADMLVSVSNAWETIT-IY  | 97  |
| MC5R-Takifugu      | ISLLENLIVIGAVKKNLHSPMYFFVCSLA      | ADMLVSVSNASETII-IY  | 108 |
| MC5R-Tetraodon     | ISLLENLIVIGAVKKNLHSPMYFFVCSLA      | ADMLVSVSNASETII-IY  | 108 |
| MC5R-Sickleback    | ISLLENLIVIGAVKKNLHSPMYFFVCSLA      | ADMLVSVSNASETIV-IY  | 112 |
| MC5R-Medaka        | VSLLLENLIVIGAVKKNLHSPMYFFVCSLA     | ADMLVSVSNASETII-IY  | 113 |
| MC5Rb-Zebrafish    | ISLLENLIVIGAVKKNLHSPMYFFVCSLA      | ADMLVSVSNASETIV-IH  | 99  |
| MC5Ra-Zebrafish    | VSLLLENLIVIGAVKKNLHSPMYFFVCSLA     | ADMLVSVSNASETIV-IY  | 102 |
| MC5R-Callorhinchus | VGMLENLIVIAAVVNRNLHSPMYFFICSLA     | ADMLVSVGKASAVI-IF   | 86  |
| MCAR-Lampetra      | VSLVENALVIAAIAARNRNLHSPMYCFICSLA   | ADMLVCLSNAWETIA-IA  | 100 |
| MCAR_Lamprey       | VSLVENALVIAAIAARNRNLHSPMYCFICSLA   | ADMLVCLSNAWETIA-IA  | 80  |
| MCBR-Lampetra      | ISLLENLIVITAILKKNLHSPMYCFICSLA     | ADMLVSVSNAWETII-MA  | 106 |
| MCBR_Lamprey       | ISLLENLIVITAILKKNLHSPMYCFICSLA     | ADMLVSVSNAWETII-MA  | 65  |
| MCRL-Branchiostoma | ASILMNGLVLSCHFRNPHLKEPMYFFVANLA    | ADCVAGLFSFFFCAT---  | 50  |

TM3

|                    |                                                       |     |
|--------------------|-------------------------------------------------------|-----|
| MC1R-Human         | PLEAGALVARAAVLQQLDNVIDVITCS---SMLSSLCFLGAIIVDRYISI    | 146 |
| MC1R-Mouse         | PLEAGILVARVALVQQLDNLIDVLCG---SMVSSLCFLGIIAIDRYISI     | 144 |
| MC1R-Rat           | PLEAGILVARAAVLQQLDNVIDVLCG---SMVSSLCFLGVIAIDRYISI     | 146 |
| MC1R-Opossum       | PLEKGVLMIQMPMLQQLDNVIDVLCG---SMMSSISFLGAIIVDRYISI     | 146 |
| MC1R-Chicken       | PMHEGVLIVIRASIVRHMDNVIDMLTCS---SVVSSLSFLGVIAVDRYITI   | 144 |
| MC1R-Zebrafinch    | PLEHGVLVMPRSIVRHMSVIDTLTCS---SVVSSLSFLGVIAVDRYITI     | 144 |
| MC1R-AnoleLizard   | PNDHGLLLGKSTIKHMDIIMDLTCS---SLLSSLSFLSVIAIDRYITI      | 132 |
| MC1R-Xenopus       | MLKQGIKSEPLLVKKMDYIFDTMTC---SLVTSLSFLGAIADRYITI       | 137 |
| MC1R-Takifugu      | PNDHGLMDMYPGMLRHLDNVIDVMTC---SVVSSLSFLCTIAADRYITI     | 144 |
| MC1R-Tetraodon     | PNDHGLMDMYPGMLRHLDNVIDAMTCS---SVVSSLSFLCTIAADRYITI    | 153 |
| MC1R-Medaka        | PNDHGLLDVHPGMLRHLDNVIDVMTC---SVVSSLSFLCTIAADRYITI     | 145 |
| MC1R-Sickleback    | PNDHGLMDVHPGMLRHLDNVIDVMTC---SVVSSLSFLCTIAADRYITI     | 151 |
| MC1R-Zebrafish     | PEHGLLLVTAKMLQHLIDMIMTCS---SVVSSLSFLCTIAADRYITI       | 151 |
| MC1R-Callorhinchus | PMERGVMMVVQNYLLKQIDNLDMMTCS---SMVSSLSFLGAIADRYITI     | 117 |
| MC2R-Human         | FRNMGYLLKPRGSFETTADDIDSLFVL---SLLGSIFSLSVIAADRYITI    | 132 |
| MC2R-Mouse         | FRNMGYLLKPRGSFESTADDIDCMFIL---SLLGSIFSLSVIAADRYITI    | 132 |
| MC2R-Rat           | FRNMGYLLKPRGSLESTADDIDCMFVL---SLLGSIFSLSVIAADRYITI    | 132 |
| MC2R-Opossum       | FRNTGYLLKPRGDFETTADDIVDSLFI---SLLGSIFSLSVIAADRYITI    | 141 |
| MC2R-Chicken       | FCCKMGYLLTRRGDFEKKLDDAMDSMFI---SLLGSIFSLLAIAADRYITI   | 147 |
| MC2R-Zebrafinch    | FCCKMGYLLTRHGDFEKKLDDAMDSMFI---SLLGSIFSLLAIAADRYITI   | 145 |
| MC2R-Turkey        | FCCKMGYLLTRRGDFEKKLDDAMDSMFI---SLLGSIFSLLAIAADRYITI   | 136 |
| MC2R-AnoleLizard   | FCKMQYVKCRGKLAKTMDIDLDMFVL---SLLGSIFSLSAIAADRYITI     | 108 |
| MC2R-Takifugu      | FAEVGHLRKGVSERKADDVDSLFCM---SFLGSIFSFLAIAVDRYITI      | 135 |
| MC2R-Tetraodon     | FADVGLRKGVYLEKLDDVDSLFCM---SFLGSIFSFLAIAVDRYITI       | 51  |
| MC2R-Sickleback    | FANIGLEKKGPSSETNDDVDSLFCM---SFGVSIVSFLAIAVDRYISI      | 122 |
| MC2R-Medaka        | FADVGOLEKRGPSSETKLDMMDSLFCM---SFGVSIVSFLAIAVDRYITI    | 127 |
| MC2R-Zebrafish     | FKDAGRLNSRGPPELKIIDDIMDSLFCM---CFLGSIFSILAIAVDRYISI   | 126 |
| MC3R-Human         | IVHSDYLLTFEDQFIQHMDNIFDSMTCI---SLVASTCNLLAIAVDRYVTI   | 146 |
| MC3R-Mouse         | VINSDSLTLLEDQFIQHMDNIFDSMTCI---SLVASTCNLLAIAVDRYVTI   | 146 |
| MC3R-Rat           | VINSDSLTLLEDQFIQHMDNIFDSMTCI---SLVASTCNLLAIAVDRYVTI   | 146 |
| MC3R-AnoleLizard   | VLEKGYLNINSRYIQPMDNIFDSMTCI---SLIGSTCNLLVIAIDRYITI    | 114 |
| MC3R-Xenopus       | I-QNKYLVIGDYLLQHLDDVFDMSMTCI---SLVASTCNLLVIAIDRYITI   | 145 |
| MC3R-Zebrafinch    | ILSNGYLLIADHFIQHMDNIFDSMTCI---SLVASTCNLLVIAIDRYITI    | 120 |
| MC3R-Turkey        | ILSSGYLLIIDDHFIQHMDNIFDSMTCI---SLVASTCNLLVIAIDRYITI   | 146 |
| MC4R-Xenopus       | PLFNTTDKNTQ-HIIVNVNIDNSVICI---SLLASICSLLSIAVDRYFTI    | 149 |
| MC4R-Zebrafish     | PLNLSLVASDQFVRLMDNVCDSMTCI---SLVASTCNLLAIAVDRYVTI     | 146 |
| MC3R-Callorhinchus | PLNNGYLVANDQFIQIMDNVFDMSLICI---SLVASTCNLLVIAIDRYITI   | 143 |
| MC4R-Human         | PLNSTDTDAQ-SFTVNIDNVIDNSVICI---SLLASICSLLSIAVDRYFTI   | 151 |
| MC4R-Mouse         | PLNSTDTDAQ-SFTVNIDNVIDNSVICI---SLLASICSLLSIAVDRYFTI   | 151 |
| MC4R-Rat           | PLNSTDTDAQ-SFTVNIDNVIDNSVICI---SLLASICSLLSIAVDRYFTI   | 151 |
| MC4R-Opossum       | PLNSTDTDAQ-SFTVNIDNVIDNSVICI---SLLASICSLLSIAVDRYFTI   | 151 |
| MC4R-Chicken       | PLNNTDTDAQ-SFTINIDNVIDNSVICI---SLLASICSLLSIAVDRYFTI   | 150 |
| MC4R-Turkey        | PLNNTDTDAQ-SFTINIDNVIDNSVICI---SLLASICSLLSIAVDRYFTI   | 150 |
| MC4R-Zebrafinch    | PLNNTDTDAQ-SFTINIDNVIDNSVICI---SLLASICSLLSIAVDRYFTI   | 150 |
| MC4R-AnoleLizard   | PLNNTDVGGH-SFTVSIIDNVIDNSVICI---SLLASICSLLSIAVDRYFTI  | 151 |
| MC4R-Takifugu      | PLNSGTLTIPATLIKSMDNVFDMSMTCI---SLLASICSLLAIAVDRYITI   | 118 |
| MC4R-Tetraodon     | PLNGGTLTIPARLIKSMDNVFDMSMTCI---SLLASICSLLAIAVDRYITI   | 148 |
| MC4R-Sickleback    | PLIAGGTLTIPVALIRKSMDNVFDMSMTCI---SLLASICSLLAIAVDRYITI | 151 |
| MC4R-Medaka        | PLNGGNLSIPVRLIKSMDNVFDMSMTCI---SLLASICSLLAIAVDRYITI   | 146 |
| MC4R-Zebrafish     | PLITGGNLTNRESIKNMDNVFDMSMTCI---SLLASISLLAIAVDRYITI    | 149 |
| MC5R-Human         | PLNKNKHLVIADAFVRHIDNVFDMSMTCI---SVVASMCSLLAIAVDRYVTI  | 144 |
| MC5R-Mouse         | PLNKNKHLVIADTFVRHIDNVFDMSMTCI---SVVASMCSLLAIAVDRYITI  | 191 |
| MC5R-Rat           | PLNKNKHVVIADTFVRHIDNVFDMSMTCI---SVVASMCSLLAIAVDRYITI  | 179 |
| MC5R-Opossum       | PLNKNKHLVMEADAFVRHIDNVFDMSMTCI---SVVASMCSLLAIAVDRYVTI | 144 |
| MC5R-Chicken       | PLNNRHIIMEDAFVRHIDNVFDMSLICI---SVVASMCSLLAIAVDRYITI   | 144 |
| MC5R-Zebrafinch    | PLNNRHVIMEDAFVRHIDNVFDMSMTCI---SVVASMCSLLAIAVDRYITI   | 114 |
| MC5R-Turkey        | PLNNRHIIMEDAFVRHIDNVFDMSLICI---SVVASMCSLLAIAVDRYITI   | 144 |
| MC5R-Takifugu      | PLNKNKQLIAEDHLIRQLDNVFDMSMTCI---SVVASMCSLLAIAVDRYVTI  | 155 |
| MC5R-Tetraodon     | PLNKNKQLVVEDHFIRQLDNVFDMSMTCI---SVVASMCSLLAIAVDRYVTI  | 155 |
| MC5R-Sickleback    | PLNKNRQLVVEDHFIRQMDNVFDMSMTCI---SVVASMCSLLAIAVDRYVTI  | 159 |
| MC5R-Medaka        | PLNKNRQLVVEEHFIRQLDNVFDMSMTCI---SVVASMCSLLAIAVDRYVTI  | 160 |
| MC5Rb-Zebrafish    | PLANRSIVIEDHFIRQMDNVFDMSLICI---SVVASMCSLLAIAVDRYVTI   | 146 |
| MC5Ra-Zebrafish    | PLTNRQLVVEDHFIRQMDNVFDMSMTCI---SVVASMCSLLAIAVDRYVTI   | 149 |
| MC5R-Callorhinchus | PLDQNSHLLTE-TLIDHLDVLFDSMTCI---SLIASISLGAIAVDRYVTI    | 132 |
| MCAR-Lampetra      | PLVHGRHVHIPARILQHVNDVDFSFICI---SVVASMCSLLAIAVDRYVTI   | 147 |
| MCAR_Lamprey       | PLVHGRHVHIPAPILQHVNDVDFSFICI---SVVASMCSLLAIAVDRYVTI   | 127 |
| MCBR-Lampetra      | PLQNGSLAMQEDTLKQMDNIMDSMTCI---SVVASMCSLLAIAVDRYVTI    | 153 |
| MCBR_Lamprey       | PLQNGSLAMQEDTLKQMDNIMDSMTCI---SVVASMCSLLAIAVDRYVTI    | 112 |
| MCRL-Branchiostoma | -----FYGEIMRPITVL--SLFCLFFVVLVLSAVGVILLSVDRYLAI       | 90  |

###

|                    | TM4                                               |          |
|--------------------|---------------------------------------------------|----------|
| MC1R-Human         | FYALRYHSIVTLPRARRAVAAIIVVASVVFSTLFIAVYDHVAVLL--   | CLVV 194 |
| MC1R-Mouse         | FYALRYHSIVTLPRARRAVVGIWMVSISSSTLFITYYKHTAVLL--    | CLVT 192 |
| MC1R-Rat           | FYALRYHSIVTLSPARRAVVGIWVSVISSTLFITYYKHTAVLL--     | CLVT 194 |
| MC1R-Opossum       | FYALRYHSIVTPCRAGKVLGIWVSSAFSGTLFISYYNHNAVLL--     | CLIG 194 |
| MC1R-Chicken       | FYALRYHSIMTLQRAVVMTASVWLASTVSSTVLITYYRNNAILL--    | CLIG 192 |
| MC1R-Zebrafinch    | FYALRYHSIMTLQRAVVMTASVWLASTASSTVLITYYHSNTIRL--    | CLIG 192 |
| MC1R-AnoleLizard   | FYALRYHNIMTFORALALILSIIWAVCFVASIVFLL-NDSPAVIT--   | CLVV 179 |
| MC1R-Xenopus       | FYALRYHSIMTLRRVVIAGVIWVSVSLVCAAIFIVYHESRAVIL--    | CLIV 185 |
| MC1R-Takifugu      | FYALRYHSIMTTPRAITIIIVIVWCASIASSILFIVYHTDNAIVV--   | CLVT 192 |
| MC1R-Tetraodon     | FYALRYHSIMTQRAIAIIVTVWCASITSSSTLFIVYHTDNAIVV--    | CLVA 201 |
| MC1R-Medaka        | FYALRYHSIMTSORAVIIIVLVWLASLISSILFIVHDTDHAVIV--    | CLIT 193 |
| MC1R-Sickleback    | FYALRYHNIMTQRAVIIIGLVWLASITSSILFIVYHTDIAVIV--     | CLVT 199 |
| MC1R-Zebrafish     | FYALRYHSIMTQRAVGIILVWLASITSSSLFIVYHTDNAVIA--      | CLVT 199 |
| MC1R-Callorhinchus | FYALRYHTIMTTRRAVGVMIWVVSITSSAIFIVYSENSAVVI--      | CLIS 165 |
| MC2R-Human         | FHALRYHSIVTMRRTVVVLTVIWTFCTGTGITMVFSSHVPTVI--     | TFTS 180 |
| MC2R-Mouse         | FHALQYHSIVTMRRTIITLTIWIMFCTGSGITMVFSHHIPTVL--     | TFTS 180 |
| MC2R-Rat           | FHALQYHSIVTMRRTVITLTVIWMFCTGSGITMVFSHHIPTVL--     | TFTS 180 |
| MC2R-Opossum       | FHALQYHNIMTMRRAISILAIWVAFCTGSGITMVFSHDVPTVI--     | SFTS 189 |
| MC2R-Chicken       | FYALRYHNIMTLQRALVILAIWTFCTGSSIAIALFSHEVATVI--     | PFTI 195 |
| MC2R-Zebrafinch    | FYALRYHNIMTLRRALVILAIWVAFCTGSSIAIALFSYEAATVI--    | PFTI 193 |
| MC2R-Turkey        | FYALRYHNIMTVRRALVILAIWVAFCTGSSIAIALFSHEIATVI--    | PFTI 184 |
| MC2R-AnoleLizard   | FYALRYHNIMTLKRALVMLGVIWVAFCTGSGIAMVLFYSYEAATV--   | SFTV 156 |
| MC2R-Takifugu      | FHALRYHNIMTMORTGAILGLIWTTCGVSAMLMVRFSDSNLIMS--    | CFVV 183 |
| MC2R-Tetraodon     | FHALRYHNDIMTLQRTGAILGLIWTTCGVSAMLMVRFSDSNLIMS--   | CFVV 99  |
| MC2R-Sickleback    | FHALRYHNIMTMRTRAVLGIWVTLGVSAMLMVRFSDSNFIMI--      | CFVV 170 |
| MC2R-Medaka        | FHALRYHNIMTMORTGGILVVIWTTCGVSAMLMVRFDFKFI--       | CFVV 175 |
| MC2R-Zebrafish     | FHALRYHMLMTRRVLIIILFTIIVLWCGTSGALMVGFFEAATVKI--   | FFIV 174 |
| MC3R-Human         | FYALRYHSIMTVRKALTLIIVAVVCCGVCVGVFIVYSESKMVI--     | CLIT 194 |
| MC3R-Mouse         | FYALRYHSIMTVRKALTLIGVIWVCCGICGVMFIVYSESKMVI--     | CLIT 194 |
| MC3R-Rat           | FYALRYHSIMTVRKALSLIIVAVVCCGICGVMFIVYSESKMVI--     | CLIT 194 |
| MC3R-AnoleLizard   | FYALRYHSIMTVKRALVILAIWVAFCTGSSIAIALFSYEAATVI--    | CLIA 162 |
| MC3R-Xenopus       | FYALRYHSIMTVKKAIALIIVVITSCIIICGIVFIVYSESKTVI--    | CLIT 193 |
| MC3R-Zebrafinch    | FYALRYHSIMTVKKAIALIIVLWVACIIICGIFIVYSESKTVI--     | CLIT 168 |
| MC3R-Turkey        | FYALRYHSIMTVKKAIALIIVLWVACIIICGIFIVYSESKTVI--     | CLIT 194 |
| MC4R-Xenopus       | FYALQYHNIMTVRRAVVVIISCIWVAFCTGSSIAIALFSYEAATVI--  | CLIS 197 |
| MC3R-Zebrafish     | FYALRYHSIMTVRRALVIAIIVLWVACIIICGIFIVYSESKTVI--    | CLIT 194 |
| MC3R-Callorhinchus | FYALRYHSIMTVKRALLLIIVVWVACIFCGIIFIVYSNKTVI--      | CLIT 191 |
| MC4R-Human         | FYALQYHNIMTVKRVGIIITCIWAACTVSGILFIVYSDSSAVI--     | CLIT 199 |
| MC4R-Mouse         | FYALQYHNIMTVRRVGIITCIWAACTVSGVLFIVYSDSSAVI--      | CLIS 199 |
| MC4R-Rat           | FYALQYHNIMTVRRVGIITCIWAACTVSGVLFIVYSDSSAVI--      | CLIT 199 |
| MC4R-Opossum       | FYALQYHNIMTVRRVGIITCIWAACTVSGILFIVYSDSSAVI--      | CLIT 199 |
| MC4R-Chicken       | FYALQYHNIMTVKRVGIIITCIWAACTVSGILFIVYSDSSVVI--     | CLIS 198 |
| MC4R-Turkey        | FYALQYHNIMTVKRVGIIITCIWAACTVSGILFIVYSDSSVVI--     | CLIS 198 |
| MC4R-Zebrafinch    | FYALQYHNIMTVKRVGIIITCIWAACTVSGILFIVYSDSSVVI--     | CLIS 198 |
| MC4R-AnoleLizard   | FYALQYHNIMTVRRVGIITCIWAACTVSGILFIVYSDSSVVI--      | CLIS 199 |
| MC4R-Takifugu      | FYALRYHNIMTVLRRASLVISSIWTCCIVSGVLFIVYSESTTVLI--   | CLIT 166 |
| MC4R-Tetraodon     | FYALRYHNIMTVLRRASLVISSIWTCCIVSGVLFIVYSESTTVLI--   | CLIT 196 |
| MC4R-Sickleback    | FYALRYHNIMTVLRRATLVIISIIWTCCIVSGVLFIVYSESTTVLI--  | CLIT 199 |
| MC4R-Medaka        | FYALRYHNIMTVLRRAAVVISSIWTCCIVSGVLFIVYSESTTVLI--   | CLIT 194 |
| MC4R-Zebrafish     | FYALRYHNIMTVRRAGTIITCIWTFCTVSGVLFIVYSESTTVLI--    | CLIS 197 |
| MC5R-Human         | FYALRYHHIMTARRSGAIIAGIWFCTGCGIVFIVYSESTYVIL--     | CLIS 192 |
| MC5R-Mouse         | FYALRYHHIMTARRSGVIIACIWFCTGCGIVFIVYSESTYVIL--     | CLIS 239 |
| MC5R-Rat           | FYALRYHHIMTARRSGVIIACIWFCTGCGIVFIVYSESTYVIL--     | CLIS 227 |
| MC5R-Opossum       | FYALRYHNIMTVKRSGLIITACIWFCTGCGIIFIVYSESTYVVI--    | CLIT 192 |
| MC5R-Chicken       | FYALRYHNIMTVKRSGLIITACIWFCTGCGIIFIVYSESTYVVI--    | CLIT 192 |
| MC5R-Zebrafinch    | FYALRYHNIMTVKRSGLIITACIWFCTGCGIIFIVYSESTYVVI--    | CLIT 162 |
| MC5R-Turkey        | FYALRYHNIMTVKRSGLIITACIWFCTGCGIIFIVYSESTYVVI--    | CLIT 192 |
| MC5R-Takifugu      | FYALRYHNIMTVRRAGCIIGGIWTFCTGCGIVFIVYSDTTPVII--    | CLVC 203 |
| MC5R-Tetraodon     | FYALRYHNIMTVRRAGCIIGGIWTFCTGCGIVFIVYSEKTPVII--    | CLVS 203 |
| MC5R-Sickleback    | FYALRYHNIMTVRRAGCIIGGIWTFCTGCGIIFIVYSDTTPVII--    | CLVS 207 |
| MC5R-Medaka        | FYALRYHNIMTVRRAGCIIGGIWTFCTGCGIVFIVYSETTPVII--    | CLVS 208 |
| MC5Rb-Zebrafish    | FYALRYHNIMTVRRAGILIGSIWTFSTSCGIIFIVYSDTTPVVV--    | CLVA 194 |
| MC5Ra-Zebrafish    | FYALRYHNIMTVRRALIIIGGIWTFCTGCGIVFIVYSDNTSPVII--   | CLVS 197 |
| MC5R-Callorhinchus | FHALRYHOIMTVKRAALIIISALWTFCTFSGSFIKFNKNAFPG--     | SLIT 180 |
| MCAR-Lampetra      | FYALQYHSIVTMRRAAVVIACVWAAACVVSGLFIVYWDHRTVIV--    | CLIA 195 |
| MCAR_Lamprey       | FYALQYH-----                                      | 134      |
| MCBR-Lampetra      | FYALRYHNIMTVRRASIIIGAIWGTCTLCGVIFIVYSDSTAVII--    | CLIT 201 |
| MCBR_Lamprey       | FYALRYHNIMTVRRASIIIGAIWGTCTLCGVIFIVYSDSTAVII--    | CLIA 160 |
| MCRL-Branchiostoma | LHPIFYQTRISQHAAVSLGIAIPVCAIACLSPLMGWNCIEIETEDCMTN | 140      |

TM5

|                    |                                                    |                            |     |
|--------------------|----------------------------------------------------|----------------------------|-----|
| MC1R-Human         | FFLAMLVLMVLYVHMLARCOHAQGIARLH----                  | KRORP-VHOGFGLKG            | 239 |
| MC1R-Mouse         | FFLAMLALMAILYAHMFTRACOHAQGI AOLH----               | KRRRS-IROGFCLKG            | 237 |
| MC1R-Rat           | FFLAMLALMAILYVHMLSRACOHAQGIARLH----                | KRRHS-IROGFCLKG            | 239 |
| MC1R-Opossum       | FFLSMLGLMVLYIHMFIQACOHAARRIARLH----                | KRHA-IHQLSTLKG             | 238 |
| MC1R-Chicken       | FFLFMLVLMVLYIHMFFALARHVSRISSQO-----                | KOPTIYRTSSSLKG             | 236 |
| MC1R-Zebrafinch    | FFLFMLVLMVLYIHMFFALARHLSISSQO-----                 | KPTT-AYRGGSLKG             | 236 |
| MC1R-AnoleLizard   | FFVAVVTLLILALYIHMFFILARHARRMSHIP----               | KKON--SPOMSSMKG            | 223 |
| MC1R-Xenopus       | FFLFMLALMVALYIHMFFALARHARSISALOKGKSRRITP-HQARANMKG |                            | 234 |
| MC1R-Takifugu      | FFCITLVFNVALYVHMFVLAHVHSSRRIMAFH-----              | KN-RRQSTSMKG               | 234 |
| MC1R-Tetraodon     | FFCITLVFNVALYVHMFLLAHVHSSRRIMAFH-----              | KN-RRQSTSMKG               | 243 |
| MC1R-Medaka        | FFFTTLVFNVALYVHMFILAHVHSSRRITAFH-----              | KS-RRPSTSMKG               | 235 |
| MC1R-Sickleback    | FFCATLVFNVALYVHMFLLAHVHSSRRITAFN-----              | KN-RRQSTSMKG               | 241 |
| MC1R-Zebrafish     | FFGVTLVFTAVLYVHMFILAHVHSSRRITAH-----               | KS-RRQSTSMKG               | 241 |
| MC1R-Callorhinchus | FFEVVVFIMGALYVHMFLLARHAKRIMAQH-----                | KKRT-LHQATSMKG             | 209 |
| MC2R-Human         | LFPLMLVFI LCYVHMFLLARSHTRKISTLP-----               | RANMKG                     | 217 |
| MC2R-Mouse         | LFPLMLVFI LCYVHMFLLARSHARKISTLP-----               | RTNMKG                     | 217 |
| MC2R-Rat           | LFPLMLVFI LCYVHMFLLARSHARKISTLP-----               | RANMKG                     | 217 |
| MC2R-Opossum       | LFPLMLVFI LCYVHMFLLARSHAKKISTLP-----               | SSR-VQPRANMKG              | 232 |
| MC2R-Chicken       | LFPLMMIFILCYVHMFLLARSHAKKIASLP-----                | TSA-VHQRTNMKG              | 238 |
| MC2R-Zebrafinch    | LFPLMMFFILCYVHMFLLARSHAKKIASLP-----                | STIHHRTNMKG                | 235 |
| MC2R-Turkey        | LFPLMMFFILCYVHMFLLARSHAKKIASLP-----                | TGA-VHQRTNMKG              | 227 |
| MC2R-AnoleLizard   | LF CFMILILICYVHMFLLARSHAKKIALMT-----               | TSSVH-Q--GANMKG            | 199 |
| MC2R-Takifugu      | FFIISLAI IYLYVYMFILARSHAKKIAALP                    | NGSGKHQHQ-RRWGHGMRG        | 232 |
| MC2R-Tetraodon     | FFIISLVIIYLYVYMFILARSHAKKIAALP                     | GGSGKHQHL-RRWGNMGRG        | 148 |
| MC2R-Sickleback    | FFVVS LAIICFLYVYMFILARSHAKKIAALP                   |                            | 208 |
| MC2R-Medaka        | FFIVSLAIICFLYVYMFLLARSHAKSIAALP                    |                            | 206 |
| MC2R-Zebrafish     | LF FTALLLILLYVHMFLLARSHANRIASMP-----               | GAQA-QHRKSGLRG             | 218 |
| MC3R-Human         | MFFAMLLMGTLYVHMFLLARSHVVKRIAALP                    | PADGVAPOQHSCMKG            | 240 |
| MC3R-Mouse         | MFFAMVLLMGTLYVHMFLLARSHVQRIAALP                    | PAGVVAPOQHSCMKG            | 240 |
| MC3R-Rat           | MFFAMVLLMGTLYVHMFLLARSHVQRIAALP                    | PADGVAPOQHSCMKG            | 240 |
| MC3R-AnoleLizard   | MFFTMLFLMASLYVHMFLLARSHIKRIAALP                    | VDDV-POORTCMKG             | 206 |
| MC3R-Xenopus       | MFFTMLVLMATLYVHMFLLARSHVVKRIAALP                   | VDGV-VQORTCMKG             | 237 |
| MC3R-Zebrafinch    | MFFTMLLLMASLYVHMFLLARSHVVKRIAALP                   | VEGV-PPORTCMKG             | 212 |
| MC3R-Turkey        | MFFTMLFLMASLYVHMFLLARSHVVKRIAALP                   | VDGV-PSORTCMKG             | 238 |
| MC4R-Xenopus       | MFFTMLALMASLYVHMFLLARSHIKRIAALP                    | GTNS-VROVTNMKG             | 241 |
| MC3R-Zebrafish     | MFFAMVLMATLYVHMFLLARSHVQRIAALP                     | PAAPGAGNAPRORSCMKG         | 244 |
| MC3R-Callorhinchus | MFFTMLVLMATLYVHMFLLARSHIKRIAALP                    | V DGI-VRPRTCMKG            | 235 |
| MC4R-Human         | MFFTMLALMASLYVHMFLLARSHIKRIAALP                    | GTGA-IROGANMKG             | 243 |
| MC4R-Mouse         | MFFTMLVLMASLYVHMFLLARSHIKRIAALP                    | GTGT-IROGTNMKG             | 243 |
| MC4R-Rat           | MFFTMLVLMASLYVHMFLLARSHIKRIAALP                    | GTGT-IROGANMKG             | 243 |
| MC4R-Opossum       | MFFTMLALMASLYVHMFLLARSHIKRIAALP                    | GTGT-IROGANMKG             | 243 |
| MC4R-Chicken       | MFFTMLILMASLYVHMFMMARSHIKKIAALP                    | GTGP-IROGANMKG             | 242 |
| MC4R-Turkey        | MFFTMLILMASLYVHMFMMARSHIKKIAALP                    | GTGP-IROGANMKG             | 242 |
| MC4R-Zebrafinch    | MFFTMLILMASLYVHMFMMARSHIKKIAALP                    | GTGP-VROGANMKG             | 242 |
| MC4R-AnoleLizard   | MFFTMLVLMASLYVHMFLLARSHIKKIAALP                    | GTGP-ICORANMKG             | 243 |
| MC4R-Takifugu      | MFFTMLVLMASLYVHMFLLARSHMKRIAALP                    | GNAP-IHORANLKG             | 210 |
| MC4R-Tetraodon     | TFFTMLVLMASLYVHMFLLARSHMKRIAALP                    | GNAP-IHORANMKG             | 240 |
| MC4R-Sickleback    | MFFTMLVLMASLYVHMFLLARSHMKRIAALP                    | GHAP-IHORANMKG             | 243 |
| MC4R-Medaka        | MFFTMLVLMASLYVHMFLLARSHMKRIAALP                    | GNAP-IHORANMKG             | 238 |
| MC4R-Zebrafish     | MFFTMLALMASLYVHMFLLARSHMKRIAALP                    | GNGP-IWOAANMKG             | 241 |
| MC5R-Human         | MFFAMLFLVSLYIHMFFLLARSHVVKRIAALP                   | GASS-ARORTSMQO             | 236 |
| MC5R-Mouse         | MFFTMLFFMVSLYIHMFFLLARSHVVKRIAALP                  | RYNS-VRORTSMKG             | 283 |
| MC5R-Rat           | MFFTMLFFMVSLYIHMFFLLARSHVVKRIAALP                  | RYNS-VRORTSMKG             | 271 |
| MC5R-Opossum       | MFFTMLFLMVSLYIHMFFLLARSHVVKRIAALP                  | GYSS-VRORTSMKG             | 236 |
| MC5R-Chicken       | MFFTMLFLMVSLYIHMFFLLARSHVVKRIAALP                  | GYNS-VHRTSMKG              | 236 |
| MC5R-Zebrafinch    | MFFTMLFLMVSLYIHMFFLLARSHVVKRIAALP                  | GTSMKG                     | 199 |
| MC5R-Turkey        | MFFTMLFLMVSLYIHMFFLLARSHVVKRIAALP                  | GYNS-VHRTSMKG              | 236 |
| MC5R-Takifugu      | MFFAMLLIMASLYSHMFLLARSHVVKRIAALP                   | GSNS-IHORASMKG             | 247 |
| MC5R-Tetraodon     | MFFAMLLIMASLYSHMFLLARSHVVKRIAALP                   | GSSS-IQORANMKG             | 247 |
| MC5R-Sickleback    | MFFAMLVIMASLYSHMFLLARSHVVKRIAALP                   | GYNS-IHORASMKG             | 251 |
| MC5R-Medaka        | MFFAMLLIMASLYSHMFLLARSHVVKRIAALP                   | GYNS-IHORASMKG             | 252 |
| MC5Rb-Zebrafish    | MFFAMLLIMASLYSHMFLLARSHVVKRIAALP                   | GYNANIRORASMKG             | 239 |
| MC5Ra-Zebrafish    | MFFIMLALMASLYSHMFLLARSHVVKRIAALP                   | GYNS-IHORASMKG             | 241 |
| MC5R-Callorhinchus | MYFTTLFVIVSLYVYMFLLARSHAQCIIRSLP                   | GQR-VHOGTSLKG              | 223 |
| MCAR-Lampetra      | LFVTMLVLMASLYAHMFALARSHAQRI SAOP                   | RSSRQGO-QNGAASLKG          | 242 |
| MCAR_Lamprey       |                                                    | RRISAOP--RSSRQGO-QHGAASLKG | 157 |
| MCBR-Lampetra      | MFFTMLVLMASLYVHMFLLARSHAKRIAALP                    | ASGI-IQHKTSMRG             | 245 |
| MCBR_Lamprey       | MFFTMLVLMASLYVHMFLLARSHAKRIAALP                    | ASGI-IQHKTSMRG             | 204 |
| MCRL-Branchiostoma | APVNYLILINATAENLPAARRRQORVAARE                     | QRQL-----KLSLKT            | 181 |

|                    | TM6                                                  |     |
|--------------------|------------------------------------------------------|-----|
| MC1R-Human         | AVTLTILLGIFFLCWGPFLLHLTLIVLCPQHPPTCCIFKKNFLFLALIIIC  | 289 |
| MC1R-Mouse         | AATLTILLGIFFLCWGPFLLHLTLIVLCPQHPPTCCIFKKNFLFLILLIVL  | 287 |
| MC1R-Rat           | AATLTILLGIFFLCWAPFFLHLTLIVLCPQHPPTCCIFKKNFLFLILLIIL  | 289 |
| MC1R-Opossum       | ATTLMILLGIFFLCWAPFFLHLTLIVLCPKHPPTCCYFONFNFFLIIIC    | 288 |
| MC1R-Chicken       | AVTLTILLGVFFLCWGPFLLHLTLIVTCTNPFCCTFFSYFNLFILIIIC    | 286 |
| MC1R-Zebrafinch    | AVTLTILLGVFFLCWGPFLLHLTLIVTCTNPFCCTFFSYFNLFVLMIC     | 286 |
| MC1R-AnoleLizard   | ATTLTILLGVFLICWGPFLLHLTLIIICPFR--CAYFNYSLYLIIIC      | 271 |
| MC1R-Xenopus       | AITLTILLGVFFLCWGPFLLHLTLIVSCPGHHICNSYFYFNLYILLVIC    | 284 |
| MC1R-Takifugu      | AITLTILLGVFFLCWGPFLLHLTLILTCTPSVFCNCYFRNFNLFLIIIC    | 284 |
| MC1R-Tetraodon     | AITLTILLGVFIVCWGPFLLHLTLILTCPNPNLCNCYFRNFNLFLIIIC    | 293 |
| MC1R-Medaka        | AITLTILLGVFFLCWGPFLLHLTLILTCTPSVFCNCYFRNFNLFLIIIC    | 285 |
| MC1R-Sickleback    | AMTLTILLGVFIVCWGPFLLHLTLILTCTPSVFCNCYFRNFNLFLIIIC    | 291 |
| MC1R-Zebrafish     | MC1R-Zebrafish                                       | 291 |
| MC1R-Callorhinchus | AITLTILLGVFLICWSPFFLHLTLIIICLPTNPYCCFTSHFNMFILIIIC   | 259 |
| MC2R-Human         | AITLTILLGVFIFCWAPFVHLVLMTFCPNSPYCACYMSLFOVNGMLIMC    | 267 |
| MC2R-Mouse         | AMTLTILLGVFIFCWAPFVHLVLMTFCPNPNPYCVGYMSLFOVNGMLIMC   | 267 |
| MC2R-Rat           | AMTLTILLGVFIFCWAPFVHLVLMTFCPNPNPYCVGYMSLFOVNGMLIMC   | 267 |
| MC2R-Opossum       | AITLTILLGVFLICWAPFVHLVLMTFCPNPNPYCACYLSIFOVNGMLIMC   | 282 |
| MC2R-Chicken       | AITLTIFLGVFLICWAPFVHLVLMTFCPNPNPYCACYMSIFHVNGTLMC    | 288 |
| MC2R-Zebrafinch    | AITLTIFLGVFLICWAPFVHLVLMTFCPNPNPYCACYMSIFHVNGTLMC    | 285 |
| MC2R-Turkey        | AITLTIFLGVFLICWAPFVHLVLMTFCPNPNPYCACYMSIFHVNGTLMC    | 277 |
| MC2R-AnoleLizard   | AITLTIVLVAVFLICWSPFFVHLVLMTFCPONPYCICYGSIFHVHGMIMC   | 249 |
| MC2R-Takifugu      | ILTLTILFGAFMVCWAPFFLHLIFLMACPMNPYCECYRSMFQLHVVLLMS   | 282 |
| MC2R-Tetraodon     | IMTLTILFGAFMVCWAPFFLHLIILMVCPMNPYCECYRSLFELHVVLLMS   | 198 |
| MC2R-Sickleback    | AMTLTILFGAFMVCWAPFFLHLIIMLCPNPNPYCECYRSLFQLHVVLLMS   | 258 |
| MC2R-Medaka        |                                                      | -   |
| MC2R-Zebrafish     | AMTLTILIGVFLICWAPFSLHLLIMMIPCENPYCECYRSLFQLHVVLLVS   | 268 |
| MC3R-Human         | AVTLTILLGVFIFCWAPFFLHLVLIITCPTNPYCICTAHFNNTYLVLMC    | 290 |
| MC3R-Mouse         | AVTLTILLGVFIFCWAPFFLHLVLIITCPTNPYCICTAHFNNTYLVLMC    | 290 |
| MC3R-Rat           | AVTLTILLGVFIFCWAPFFLHLVLIITCPTNPYCICTAHFNNTYLVLMC    | 290 |
| MC3R-AnoleLizard   | AVTLTILLGVFIVCWGPFLLHLIILISCPNPHCFYIISHFNNTYLVLMC    | 256 |
| MC3R-Xenopus       | AITLTILLGVFVVCWAPFFLHLIILISCPNSNYCVYTSYFNNTYLVLMC    | 287 |
| MC3R-Zebrafinch    | AVTLTILLGVFIVCWAPFFLHLIILISCPNPNYCICTAHFNNTYLVLMC    | 262 |
| MC3R-Turkey        | AVTLTILLGVFIVCWAPFFLHLIILISCPMNSYCVYTSYFNNTYLVLMC    | 288 |
| MC4R-Xenopus       | AITLTILLGVFVACWSPFFLHLIFVYSCPRNPYCVCFMESHFNNTYLVLMC  | 291 |
| MC3R-Zebrafish     | AVTISILLGVFVVCWAPFFLHLIILVSCPHHPLCIYMSHFNNTYLVLMC    | 294 |
| MC3R-Callorhinchus | AITLTILLGIFFLICWAPFFLHLIILISCPKNAYCICYTSHFNNTYLVLMC  | 285 |
| MC4R-Human         | AITLTILIGVFLVVCWAPFFLHLIFYISCPONPYCVCFMESHFNNTYLVLMC | 293 |
| MC4R-Mouse         | AITLTILIGVFLVVCWAPFFLHLIFYISCPONPYCVCFMESHFNNTYLVLMC | 293 |
| MC4R-Rat           | AITLTILIGVFLVVCWAPFFLHLIFYISCPONPYCVCFMESHFNNTYLVLMC | 293 |
| MC4R-Opossum       | AITLTILIGVFLVVCWAPFFLHLIFYISCPONPYCVCFMESHFNNTYLVLMC | 293 |
| MC4R-Chicken       | AITLTILIGVFLVVCWAPFFLHLIFYISCPYNPYCVCFMESHFNNTYLVLMC | 292 |
| MC4R-Turkey        | AITLTILIGVFLVVCWAPFFLHLIFYISCPYNPYCVCFMESHFNNTYLVLMC | 292 |
| MC4R-Zebrafinch    | AITLTILIGVFLVVCWAPFFLHLIFYISCPYNPYCVCFMESHFNNTYLVLMC | 292 |
| MC4R-AnoleLizard   | AITLTILIGVFLVVCWAPFFLHLIFYISCPHNPYCICTFMSHFHNTYLVLMC | 293 |
| MC4R-Takifugu      | AITLTILLGVFLVVCWAPFFLHLIIMITCPKNPYCTCFMESHFNNTYLVLMC | 260 |
| MC4R-Tetraodon     | AITLTILLGVFLVVCWAPFFLHLIIMITCPKNPYCTCFMESHFNNTYLVLMC | 290 |
| MC4R-Sickleback    | AITLTILLGVFLVVCWAPFFLHLIIMITCPNPNYCTCFMESHFNNTYLVLMC | 293 |
| MC4R-Medaka        | AITLTILLGVFLVVCWAPFFLHLIIMITCPNPNYCTCFMESHFNNTYLVLMC | 288 |
| MC4R-Zebrafish     | AITLTILLGVFLVVCWAPFFLHLIIMISCPNPNYCVCFMESHFNNTYLVLMC | 291 |
| MC5R-Human         | AVTIVMILLGVFIVCWAPFFLHLIIMISCPONLYCSRFSHFNMNTYLVLMC  | 286 |
| MC5R-Mouse         | AITLTMLLGFIVCWSPFFLHLIIMISCPONVYCSCFMSYFNNTYLVLMC    | 333 |
| MC5R-Rat           | ATTLTMLLGFIVCWSPFFLHLIIMISCPONVYCACFMSYFNNTYLVLMC    | 321 |
| MC5R-Opossum       | AITLTMLLGVFIVCWAPFFLHLIIMISCPONLYCICFMSHFNMNTYLVLMC  | 286 |
| MC5R-Chicken       | AITLTMLLGFIVCWAPFFLHLIIMISCPONLYCICFMSHFNMNTYLVLMC   | 286 |
| MC5R-Zebrafinch    | AITLTMLLGFIVCWAPFFLHLIIMISCPONLYCICFMSHFNMNTYLVLMC   | 249 |
| MC5R-Turkey        | AITLTMLLGFIVCWAPFFLHLIIMISCPONLYCICFMSHFNMNTYLVLMC   | 286 |
| MC5R-Takifugu      | AITLTILLGIFFLICWAPFFLHLIIMISCPNLYCMCFMSHFNMNTYLVLMC  | 297 |
| MC5R-Tetraodon     | AITLTILLGIFFLICWAPFFLHLIIMISCPNLYCICFMSHFNMNTYLVLMC  | 297 |
| MC5R-Sickleback    | AITLTILLGIFFLICWAPFFLHLIIMISCPNLYCICFMSHFNMNTYLVLMC  | 301 |
| MC5R-Medaka        | AITLTILLGIFFLICWAPFFLHLIIMISCPNLYCICFMSHFNMNTYLVLMC  | 302 |
| MC5Rb-Zebrafish    | AVTLTILLGIFFLICWAPFFLHLIIMISCPNLYCICFMSHFNMNTYLVLMC  | 289 |
| MC5Ra-Zebrafish    | AVTLTILLGIFFLICWAPFFLHLIIMISCPNLYCICFMSHFNMNTYLVLMC  | 291 |
| MC5R-Callorhinchus | AITLTILLGIFFLICWAPFFLHLIIVLACPSNPYCTCYMSLFOVDLIIIMC  | 273 |
| MCAR-Lampetra      | AVTLSILLGVFVFCWAPFFLHLTFIISCPANPYCAYIAYFPLVLLIMI     | 292 |
| MCAR_Lamprey       | AVTLSILLGVFVFCWAPFFLHLTFIISCPANPYCAYIAYFPLVLLIMI     | 207 |
| MCBR-Lampetra      | AITLTILLGVFIVCWAPFFLHLIIVS CPRSPYCVGYMSHFNLVLIIML    | 295 |
| MCBR_Lamprey       | AITLTILLGVFIVCWAPFFLHLIIVS CPRSPYCVGYMSHFNLVLIIML    | 254 |
| MCRL-Branchiostoma | AVTVVMIAAMFIVVWLPICIGVVRGISCHADENCETEARPY-WGLLIIFAC  | 230 |

|                    | TM7                                                    |     |
|--------------------|--------------------------------------------------------|-----|
| MC1R-Human         | NAIDPLIYAFHSOELRRTLKEVL-TC-SW-----                     | 317 |
| MC1R-Mouse         | SSIVDPLIYAFRSOELRMTLKEVL-LC-SW-----                    | 315 |
| MC1R-Rat           | SSIVDPLIYAFRSOELRMTLKEVL-LC-SW-----                    | 317 |
| MC1R-Opossum       | NSIIDPLIYAFRSOELRRTFKEVI-LCSC-----                     | 316 |
| MC1R-Chicken       | NSVIDPLIYAFRSOELRRTLREVV-LC-SW-----                    | 314 |
| MC1R-Zebrafinch    | NSVIDPLIYAFRSOELRRTLREVV-TC-SW-----                    | 314 |
| MC1R-AnoleLizard   | NSVVDPIYAFRSOELKRTLKMDL-FL-VW-----                     | 299 |
| MC1R-Xenopus       | NSVIDPLIYAFRSOELRKT-----                               | 303 |
| MC1R-Takifugu      | NSIIDPLIYAFRSOELRKTLOELV-LC-SW-----                    | 312 |
| MC1R-Tetraodon     | NSIIDPLIYAFRSOELRKTLOELL-LC-SWCLGL-----                | 325 |
| MC1R-Medaka        | NSIIDPLIYAFRSOELRKTLOEML-MC-SF-----                    | 313 |
| MC1R-Sickleback    | NSIIDPLIYAFRSHELRRTLRELV-LC-SWCFGV-----                | 323 |
| MC1R-Zebrafish     | NSIIDPLIYAFRSOELRKTLELI-FC-SWCFV-----                  | 323 |
| MC1R-Callorhinchus | NSVIDPII-----                                          | 267 |
| MC2R-Human         | NAVIDPIYAFRSPELRDAFKKMFCSRYW-----                      | 297 |
| MC2R-Mouse         | NAVIDPIYAFRSPELRDAFKRML-FCNRY-----                     | 296 |
| MC2R-Rat           | NAVIDPIYAFRSPELRDAFKML-FCNRY-----                      | 296 |
| MC2R-Opossum       | NAIDPMIYAFRSPELRSTFKMF-CCSGYK-----                     | 312 |
| MC2R-Chicken       | NAIDPMIFAFRSPELRSTFKMF-CCARYNWNWKLNEGEYRSTPMQH-----    | 337 |
| MC2R-Zebrafinch    | NAIINPMIFAFRSPELRSTFKMF-YCSRSNCV-----                  | 318 |
| MC2R-Turkey        | NAIDPMIFAFRSPELRSTFKMF-CCARHNW-----                    | 308 |
| MC2R-AnoleLizard   | NAVIDPMIYAFRSPELRSTFRFI-SC-SY-----                     | 277 |
| MC2R-Takifugu      | HALIDPIYAFRIPELRHTFRML-PCLNWR-----                     | 312 |
| MC2R-Tetraodon     | HALIDPGIYAFRIPELRHTFRML-LCLNWRSLT-----                 | 232 |
| MC2R-Sickleback    | HAFIDPAIYAFRSVELRHTFRML-LCSDWKRC-----                  | 291 |
| MC2R-Medaka        | -----                                                  | -   |
| MC2R-Zebrafish     | HAVIDPAIYAFRSVELRNTYKML-LSSASRICKRCA-----              | 304 |
| MC3R-Human         | NSVIDPLIYAFRSLELRNTFKEILCGCNGMNLG-----                 | 323 |
| MC3R-Mouse         | NSVIDPLIYAFRSLELRNTFKEILCGCNSMNLG-----                 | 323 |
| MC3R-Rat           | NSVIDPLIYAFRSLELRNTFKEILCGCNGMNVG-----                 | 323 |
| MC3R-AnoleLizard   | NSVIDPIIYAFRSLEMRKTFKEI-MVCCCFGLSSG-----               | 289 |
| MC3R-Xenopus       | NSIIDPLIYAFRSLEMRKTFKEI-CYGLDLLIGWGGRY-----            | 326 |
| MC3R-Zebrafinch    | NSVIDPLIYAFRSLEMRKTFKEIMCCCYGMSVG-----                 | 295 |
| MC3R-Turkey        | NSVIDPLIYAFRSLEMRKTFKEIVCCCYGVSVG-----                 | 321 |
| MC4R-Xenopus       | NSVIDPLIYAFRSOELRKTFKEMM-CCYCMSMGKTF-----              | 327 |
| MC3R-Zebrafish     | NSVIDPLIYAFRSLEMRKTFKEIL-CCFGCQP---AL-----             | 327 |
| MC3R-Callorhinchus | NSVIDPMIYAFRSOEMRKTFKEI-CCYGMNLNSRCKY-----             | 322 |
| MC4R-Human         | NSIIDPLIYAFRSOELRKTFKEI-CYPLGG---LCD---LSSRY---        | 332 |
| MC4R-Mouse         | NAVIDPLIYAFRSOELRKTFKEI-CFYPLGG---ICE---LSSRY---       | 332 |
| MC4R-Rat           | NAVIDPLIYAFRSOELRKTFKEI-CFYPLGG---ICE---LPGRY---       | 332 |
| MC4R-Opossum       | NSIIDPLIYAFRSOELRKTFKEI-CYTLGG---PCD---LAGRY---        | 332 |
| MC4R-Chicken       | NSIIDPLIYAFRSOELRKTFKEI-CCNLRG---LCD---LPGKY---        | 331 |
| MC4R-Turkey        | NSIIDPLIYAFRSOELRKTFKEI-CCSLRG---LCD---LPGKY---        | 331 |
| MC4R-Zebrafinch    | NSIIDPLIYAFRSOELRKTFKEI-CCSLRG---LCD---FPGKY---        | 331 |
| MC4R-AnoleLizard   | NSIIDPLIYAFRSOELRKTFKEI-CCYSLRE---LCD---FSSKY---       | 332 |
| MC4R-Takifugu      | NSVIDPIIYAFRSOEMRKTFKEIF-CCSQMLMNTCTEFCNGYDSKY---      | 306 |
| MC4R-Tetraodon     | NSVIDPIIYAFRSOEMRKTFKEIF-CCSQALL---CM-----             | 323 |
| MC4R-Sickleback    | NSVIDPIIYAFRSOEMRKTFKEIF-CCSHALL---FV-----             | 326 |
| MC4R-Medaka        | NSVIDPIIYAFRSOEMRKTFKEIF-CCSNALV---CF-----             | 321 |
| MC4R-Zebrafish     | NSVIDPLIYAFRSOEMRKTFKEIC-CC--WYGLASLCV-----            | 326 |
| MC5R-Human         | NSVMDPLIYAFRSOEMRKTFKEI-CCRGFRI---ACS---FPRRD---       | 325 |
| MC5R-Mouse         | NSVIDPLIYAFRSOEMRRTFKEIV-CCHGFRR---PCR---LLGGY---      | 372 |
| MC5R-Rat           | NSVIDPLIYAFRSOEMRRTFKEII-CCHGFRR---TCT---LLGRY---      | 360 |
| MC5R-Opossum       | NSVIDPLIYAFRSOEMRKTFKEI-CCYGLRM---TCG---FPIKY---       | 325 |
| MC5R-Chicken       | NSVIDPLIYAFRSOEMRKTFKEI-CCYSVRM---VCG---LSNKY---       | 325 |
| MC5R-Zebrafinch    | NSVIDPLIYAFRSOEMRKTFKEI-CCYSLR-----                    | 279 |
| MC5R-Turkey        | NSVIDPLIYAFRSOEMRKTFKEI-CCYSVRT---VCG---LSNKY---       | 325 |
| MC5R-Takifugu      | NSVIDPLIYAFRSOEMRKTFKEI-FCYSLRN---TCSTICTLPGKY---      | 340 |
| MC5R-Tetraodon     | NSVIDPLIYAFRSOEMRKTFKEI-CCYTLRN---ACSSFCTFTGKY---      | 340 |
| MC5R-Sickleback    | NSVIDPLIYAFRSOEMRKTFKEI-CCYSLRN---ACTNICALTGKY---      | 344 |
| MC5R-Medaka        | NAVIDPLIYAFRSOEMRKTFKEI-FCFSLTN---ICTNLCAITGKY---      | 345 |
| MC5Rb-Zebrafish    | NSVIDPLIYAFRSOEMRKTFKEIV-CCEGLRS---FCN---MVSRY---      | 328 |
| MC5Ra-Zebrafish    | NSVIDPLIYAFRSOEMRKTLEI-CCYSLRN---VFG---MSR---          | 328 |
| MC5R-Callorhinchus | NSIIDPLIFAFRSPELRNTFKKMC-IC-----                       | 299 |
| MCAR-Lampetra      | NSVIDPLIYAFRSPELRVIIRDTLRKCGRGRGRGANGTRGSSCCCVQVR----- | 341 |
| MCAR_Lamprey       | NSVIDPLIYAFRSPELRVIIRDTLRKCGR-----                     | 236 |
| MCBR-Lampetra      | SSVIDPIIYAFRSHEMRHTFKEIV-CCYSGSL---YCA--LPATWKY---     | 336 |
| MCBR_Lamprey       | SSVIDPIIYAFRSHEMRHTFKEIV-CCYSGSL---Y-----              | 286 |
| MCRL-Branchiostoma | GSVVNPIYAFRMKKIRE-----                                 | 248 |



|                    |                      |     |
|--------------------|----------------------|-----|
| MC1R-Human         | -----                | -   |
| MC1R-Mouse         | -----                | -   |
| MC1R-Rat           | -----                | -   |
| MC1R-Opossum       | -----                | -   |
| MC1R-Chicken       | -----                | -   |
| MC1R-Zebrafinch    | -----                | -   |
| MC1R-AnoleLizard   | -----                | -   |
| MC1R-Xenopus       | -----                | -   |
| MC1R-Takifugu      | -----                | -   |
| MC1R-Tetraodon     | -----                | -   |
| MC1R-Medaka        | -----                | -   |
| MC1R-Sickleback    | -----                | -   |
| MC1R-Zebrafish     | -----                | -   |
| MC1R-Callorhinchus | -----                | -   |
| MC2R-Human         | -----                | -   |
| MC2R-Mouse         | -----                | -   |
| MC2R-Rat           | -----                | -   |
| MC2R-Opossum       | -----                | -   |
| MC2R-Chicken       | HFAELKILTQNDTTLAGNCQ | 357 |
| MC2R-Zebrafinch    | -----                | -   |
| MC2R-Turkey        | -----                | -   |
| MC2R-AnoleLizard   | -----                | -   |
| MC2R-Takifugu      | -----                | -   |
| MC2R-Tetraodon     | -----                | -   |
| MC2R-Sickleback    | -----                | -   |
| MC2R-Medaka        | -----                | -   |
| MC2R-Zebrafish     | -----                | -   |
| MC3R-Human         | -----                | -   |
| MC3R-Mouse         | -----                | -   |
| MC3R-Rat           | -----                | -   |
| MC3R-AnoleLizard   | -----                | -   |
| MC3R-Xenopus       | -----                | -   |
| MC3R-Zebrafinch    | -----                | -   |
| MC3R-Turkey        | -----                | -   |
| MC4R-Xenopus       | -----                | -   |
| MC3R-Zebrafish     | -----                | -   |
| MC3R-Callorhinchus | -----                | -   |
| MC4R-Human         | -----                | -   |
| MC4R-Mouse         | -----                | -   |
| MC4R-Rat           | -----                | -   |
| MC4R-Opossum       | -----                | -   |
| MC4R-Chicken       | -----                | -   |
| MC4R-Turkey        | -----                | -   |
| MC4R-AnoleLizard   | -----                | -   |
| MC4R-Zebrafinch    | -----                | -   |
| MC4R-Takifugu      | -----                | -   |
| MC4R-Tetraodon     | -----                | -   |
| MC4R-Sickleback    | -----                | -   |
| MC4R-Medaka        | -----                | -   |
| MC4R-Zebrafish     | -----                | -   |
| MC5R-Human         | -----                | -   |
| MC5R-Mouse         | -----                | -   |
| MC5R-Rat           | -----                | -   |
| MC5R-Opossum       | -----                | -   |
| MC5R-Chicken       | -----                | -   |
| MC5R-Zebrafinch    | -----                | -   |
| MC5R-Turkey        | -----                | -   |
| MC5R-Takifugu      | -----                | -   |
| MC5R-Tetraodon     | -----                | -   |
| MC5R-Sickleback    | -----                | -   |
| MC5R-Medaka        | -----                | -   |
| MC5Rb-Zebrafish    | -----                | -   |
| MC5Ra-Zebrafish    | -----                | -   |
| MC5R-Callorhinchus | -----                | -   |
| MCAR-Lampetra      | -----                | -   |
| MCAR_Lamprey       | -----                | -   |
| MCBR-Lampetra      | -----                | -   |
| MCBR_Lamprey       | -----                | -   |
| MCRL-Branchiostoma | -----                | -   |
