# Supplementary material for: Spliceosomal Intron Insertions in Genome Compacted Ray-Finned Fishes as Evident from Phylogeny of MC Receptors, Also Supported by a Few Other GPCRs
Source: PubMed Central journal article supplement (PMC3151243; doi:10.1371/journal.pone.0022046), 2011-08-05
Supplement: pone.0022046.s005.pdf [file pone.0022046.s005.pdf]

Figure S5.

|                 |                                                    |    |
|-----------------|----------------------------------------------------|----|
| MC5R-Human      | -----MNS                                           | 3  |
| MC5R-Mouse      | MQDQSPVNRFRNSQKPPGTREESCLPLRGAEQNGKSDAKKKGHSLPAMNS | 50 |
| MC5R-Rat        | -----SQKPPGTREESCLPLRGAEQNGKFEAKKWRHFLPAMNS        | 38 |
| MC5R-Chicken    | -----MNTS---SOLYVSELNLS                            | 15 |
| MC5R-Turkey     | -----MNTS---SOLYVSELNLS                            | 15 |
| MC5R-Zebrafinch | -----                                              | -  |
| MC5R-Takifugu   | -----MNTSHRSSDPQEGIMGNS                            | 18 |
| MC5R-Tetraodon  | -----MNATHGSSNPQEGILGNS                            | 18 |
| MC5R-Sickleback | -----MNLSESSYREELLGNF                              | 18 |
| MC5R-Medaka     | -----TAPMEVTDKTNLSLHKAQLANS                        | 21 |
| MC5Ra-Zebrafish | -----MNTS-ETTLPFWGMHVNS                            | 17 |
| MC5Rb-Zebrafish | -----MNSSEWPTLSPNSSLSQA                            | 18 |

34c-MMU

|                 |                                                      |            |     |
|-----------------|------------------------------------------------------|------------|-----|
|                 |                                                      | <b>TM1</b> |     |
| MC5R-Human      | SFHLHFLDLNLNATEGNLSGPNVKNKSSPCEDMGIAVEVFLTLGLVISLLE  |            | 53  |
| MC5R-Mouse      | SSTLTVLNLTNLASEDGILGSNVKNKSLACEEMGIAVEVFLTLGLVSLLE   |            | 100 |
| MC5R-Rat        | SSHLLTLLDLTLNASEDNILGQVNNKSSACEDMGIAVEVFLTLGLVSLLE   |            | 88  |
| MC5R-Chicken    | AFGS-----NFIVPTV-----KSKSPCEQVIAAEVFLTLGLVISLLE      |            | 53  |
| MC5R-Turkey     | AFGS-----NFIVPTV-----KSKSPCEQVIAAEVFLTLGLVISLLE      |            | 53  |
| MC5R-Zebrafinch | -----SPCEQVIAAEVFLTLGLVISLLE                         |            | 23  |
| MC5R-Takifugu   | TWNPLSYQPNFVTLSPPLLP----KTKTAACEQLHIAIEVFLTLGLIISLLE |            | 64  |
| MC5R-Tetraodon  | TWNLSLFHQPNSSLSPPPLP----KNKTAACEQLHIAIEVFLTLGLIISLLE |            | 64  |
| MC5R-Sickleback | TLAYSYHHQNYTPVPPPLHPDKTGTSKPAACEQVHIAIEVFLTLGLIISLLE |            | 68  |
| MC5R-Medaka     | TWN--FYQONYTIAPPSLKDKTSPSAAAACEQVHIAIEVFLTLGLVISLLE  |            | 69  |
| MC5Ra-Zebrafish | SPAS--YILNATETP-----SHNKKPACEQLNIATEVFLTLGLVISLLE    |            | 58  |
| MC5Rb-Zebrafish | NLS-----DESSRPK-----TSASAACEQVHIAIEVFLTLGLIISLLE     |            | 55  |

41a

|                 |                                                      |            |     |
|-----------------|------------------------------------------------------|------------|-----|
|                 |                                                      | <b>TM2</b> |     |
| MC5R-Human      | NILVIGAIVKKNLHSPMYFFVCSLAVADMLVSMSSAWETITIIYLLNNKH   |            | 103 |
| MC5R-Mouse      | NILVIGAIVKKNLHSPMYFFVGS LAVADMLVSMSSAWETVITIIYLLNNKH |            | 150 |
| MC5R-Rat        | NILVIGAIVKKNLHSPMYFFVGS LAVADMLVSMSSAWETITIIYLLNNKH  |            | 138 |
| MC5R-Chicken    | NILVIGAIVKKNLHSPMYFFVCSLAVADMLVSVSNAWETITIIYLLNNRH   |            | 103 |
| MC5R-Turkey     | NILVIGAIVKKNLHSPMYFFVCSLAVADMLVSVSNAWETITIIYLLNNRH   |            | 103 |
| MC5R-Zebrafinch | NILVIGAIVKKNLHSPMYFFVCSLAVADMLVSVSNAWETITIIYLLNNRH   |            | 73  |
| MC5R-Takifugu   | NILVIGAIVKKNLHSPMYFFVCSLAVADMLVSVSNASETITIIYLLNNKQ   |            | 114 |
| MC5R-Tetraodon  | NILVIGAIVKKNLHSPMYFFVCSLAVADMLVSVSNAWETITIIYLLNNKQ   |            | 114 |
| MC5R-Sickleback | NILVIGAIVKKNLHSPMYFFVCSLAVADMLVSVSNAWETITIIYLLNNRQ   |            | 118 |
| MC5R-Medaka     | NILVIGAIVKKNLHSPMYFFVCSLAVADMLVSVSNAWETITIIYLLNNRQ   |            | 119 |
| MC5Ra-Zebrafish | NILVIGAIVKKNLHSPMYFFVCSLAVADMLVSVSNAWETITIIYLLNNRQ   |            | 108 |
| MC5Rb-Zebrafish | NILVIGAIVKKNLHSPMYFFVCSLAVADMLVSVSNAWETITIIYLLNNRS   |            | 105 |

77c

|                 |                                                    |            |     |
|-----------------|----------------------------------------------------|------------|-----|
|                 |                                                    | <b>TM3</b> |     |
| MC5R-Human      | LVIADAFVRHIDNVFDSMICISVVASMCSLLAIAVDRIYITIFALRYHHI |            | 153 |
| MC5R-Mouse      | LVIADAFVRHIDNVFDSMICISVVASMCSLLAIAVDRIYITIFALRYHHI |            | 200 |
| MC5R-Rat        | VVIADAFVRHIDNVFDSMICISVVASMCSLLAIAVDRIYITIFALRYHHI |            | 188 |
| MC5R-Chicken    | IIMEDAFVRHIDNVFDSLICISVVASMCSLLAIAVDRIYITIFALRYHNI |            | 153 |
| MC5R-Turkey     | IIMEDAFVRHIDNVFDSLICISVVASMCSLLAIAVDRIYITIFALRYHNI |            | 153 |
| MC5R-Zebrafinch | VIMEDAFVRHIDNVFDSMICISVVASMCSLLAIAVDRIYITIFALRYHNI |            | 123 |
| MC5R-Takifugu   | LIAEDHFIROLDNVFDSMICISVVASMCSLLAIAVDRIYITIFALRYHNI |            | 164 |
| MC5R-Tetraodon  | LIVVEDEFIROLNVFDSMICISVVASMCSLLAIAVDRIYITIFALRYHNI |            | 164 |
| MC5R-Sickleback | LIVVEDEFIROMDNVFSMICISVVASMCSLLAIAVDRIYITIFALRYHNI |            | 168 |
| MC5R-Medaka     | LIVVEDEFIROLNVFDSMICISVVASMCSLLAIAVDRIYITIFALRYHNI |            | 169 |
| MC5Ra-Zebrafish | LIVVEDEFIROMDNVFSMICISVVASMCSLLAIAVDRIYITIFALRYHNI |            | 158 |
| MC5Rb-Zebrafish | LIVIEDEFIROMDNVFSMICISVVASMCSLLAIAVDRIYITIFALRYHNI |            | 155 |

140c

(Numbering according to human MC5R)

|                 | TM4                            | TM5                     |     |
|-----------------|--------------------------------|-------------------------|-----|
| MC5R-Human      | MTARRSGAIIAGIWFCTGCGIVFIIYSE   | ESTYVILCLISMFFAMLFLLVLS | 203 |
| MC5R-Mouse      | MTARRSGVIIACIWFCTGCGIVFIIYSE   | SKYVVICLISMFFTMLFFMVS   | 250 |
| MC5R-Rat        | MTARRSGVIIACIWFCTGCGIVFIIYSE   | SKYVVICLISMFFTMLFFMVS   | 238 |
| MC5R-Chicken    | MTVKRSGLIIACIWFCTGCGIIFIIYSE   | STYVVICLITMFFTMLFLMVS   | 203 |
| MC5R-Turkey     | MTVKRSGLIIACIWFCTGCGIIFIIYSE   | STYVVICLITMFFTMLFLMVS   | 203 |
| MC5R-Zebrafinch | MTVKRSGLIIACIWFCTGCGIIFIIYSE   | STYVVICLITMFFTMLFLMVS   | 173 |
| MC5R-Takifugu   | MTVRRAGCIIIGGIWFCTGCGIVFIIYSD  | ETTPVVICLVCMFFAMLLIMAS  | 214 |
| MC5R-Tetraodon  | MTVRRAGCIIIGGIWFCTGCGIVFIIYSE  | KTPVVICLVSMFFAMLLIMAS   | 214 |
| MC5R-Sickleback | MTVRRAGCIIIGGIWFCTGCGIIFIIYSD  | ETTPVVICLVSMFFAMLVIMAS  | 218 |
| MC5R-Medaka     | MTMRRAGCIIIGGIWFCTGCGIVFIIYSE  | ETTPVVICLVSMFFAMLLIMAS  | 219 |
| MC5Ra-Zebrafish | MTVRRALIIIGGIWFCTGCGIVFIIYSD   | NTSVIVCLVSMFFIMLALMAS   | 208 |
| MC5Rb-Zebrafish | MTVRRAGLIIIGSIWTFSTSCGIIFIIYSD | ETTPVVVCLVAMFFAMLLMMAS  | 205 |

|                 | TM6                               |                   |     |
|-----------------|-----------------------------------|-------------------|-----|
| MC5R-Human      | LYTHMFLLRTHVKRIAALPGASS-ARQRTSMQ  | GAVTVTMLLGVFIVCWA | 252 |
| MC5R-Mouse      | LYTHMFLLRNTHVKRIAASPRYNS-VRQRTSMK | GAITLTMLLGIFIVCWS | 299 |
| MC5R-Rat        | LYTHMFLLRNTHVKRIAASPRYNS-VRQRTSMK | GAITLTMLLGIFIVCWS | 287 |
| MC5R-Chicken    | LYTHMFLLRTHVKKIAALPGYNS-VHQRTSMK  | GAITLTMLLGIFIVCWA | 252 |
| MC5R-Turkey     | LYTHMFLLRTHVKKIAALPGYNS-VHQRTSMK  | GAITLTMLLGIFIVCWA | 252 |
| MC5R-Zebrafinch | LYTHMFLLRTHVKKIAALPG-----TSMK     | GAITLTMLLGIFIVCWA | 215 |
| MC5R-Takifugu   | LYSHMFLARSHVKRIAALPGSNS-IHQRTSMK  | GAITLTILLGIFIVCWA | 263 |
| MC5R-Tetraodon  | LYSHMFLARSHVKRIAALPGSSS-IQORANMK  | GAITLTILLGIFIVCWA | 263 |
| MC5R-Sickleback | LYSHMFLARSHVKRIAALPGYNS-IHQRTSMK  | GAITLTILLGIFIVCWA | 267 |
| MC5R-Medaka     | LYSHMFLARSHVKRIAALPGYNS-IHQRTSMK  | GAITLTILLGIFIVCWA | 268 |
| MC5Ra-Zebrafish | LYSHMFLARSHVKRIAALPGYNS-IHQRTSMK  | GAITLTILLGIFIVCWA | 257 |
| MC5Rb-Zebrafish | LYSHMFLARSHVKRMAALPGYNANIRQRTSMK  | GAVTLTILLGIFIVCWA | 255 |

|                 | TM7                    |                                  |     |
|-----------------|------------------------|----------------------------------|-----|
| MC5R-Human      | PFFLHLTLMLSCPONLYCSRFM | SHFNMYLILIMCNSVMDPLIYAFRSQEM     | 302 |
| MC5R-Mouse      | PFFLHLILMISCPONVYCS    | CFMSYFNMYLILIMCNSVIDPLIYAFRSQEM  | 349 |
| MC5R-Rat        | PFFLHLILMISCPONVYCA    | CFMSYFNMYLILIMCNSVIDPLIYAFRSQEM  | 337 |
| MC5R-Chicken    | PFFLHLILMISCPONLYC     | VCFMSHFNMYLILIMCNSVIDPLIYAFRSQEM | 302 |
| MC5R-Turkey     | PFFLHLILMISCPONLYC     | VCFMSHFNMYLILIMCNSVIDPLIYAFRSQEM | 302 |
| MC5R-Zebrafinch | PFFLHLILMISCPONLYC     | VCFMSHFNMYLILIMCNSVIDPLIYAFRSQEM | 265 |
| MC5R-Takifugu   | PFFLHLILMISCPRNLYC     | MCFMSHFNMYLILIMCNSVIDPLIYAFRSQEM | 313 |
| MC5R-Tetraodon  | PFFLHLILMISCPRNLYC     | MCFMSHFNMYLILIMCNSVIDPLIYAFRSQEM | 313 |
| MC5R-Sickleback | PFFLHLILMISCPRNLYC     | VCFMSHFNMYLILIMCNSVIDPLIYAFRSQEM | 317 |
| MC5R-Medaka     | PFFLHLILMISCPRNLYC     | MCFMSHFNMYLILIMCNSVIDPLIYAFRSQEM | 318 |
| MC5Ra-Zebrafish | PFFLHLILMISCPRNLYC     | MCFMSHFNMYLILIMCNSVIDPLIYAFRSQEM | 307 |
| MC5Rb-Zebrafish | PFFLHLILMISCPRNLYC     | VCFMSHFNMYLILIMCNSVIDPLIYAFRSQEM | 305 |

|                 |                         |       |     |
|-----------------|-------------------------|-------|-----|
| MC5R-Human      | RKTFKEIICCRGFRIACS----  | FPRRD | 325 |
| MC5R-Mouse      | RRTFKEIVCCHGFRRPCR----  | LLGGY | 372 |
| MC5R-Rat        | RRTFKEIICCHGFRRTCT----  | LLGRY | 360 |
| MC5R-Chicken    | RKTFKEIICCYSVRMVCG----  | LSNKY | 325 |
| MC5R-Turkey     | RKTFKEIICCYSVRTVCG----  | LSNKY | 325 |
| MC5R-Zebrafinch | RKTFKEIICCYSLR-----     |       | 279 |
| MC5R-Takifugu   | RKTFKEIIFCYSLRNTCSTICTL | PGKY  | 340 |
| MC5R-Tetraodon  | RKTFKEIICCYTLRNACSSFCT  | TGKY  | 340 |
| MC5R-Sickleback | RKTFKEIICCYSLRNACTNICAL | TGKY  | 344 |
| MC5R-Medaka     | RKTFKEIIFCFSLTNICTNLCA  | TGKY  | 345 |
| MC5Ra-Zebrafish | RKTFKEIICCYSLRNVFG----  | MSR-- | 328 |
| MC5Rb-Zebrafish | RKTFKEIVCCEGLRSFCN----  | MVSKY | 328 |
