# Supplementary material for: Spliceosomal Intron Insertions in Genome Compacted Ray-Finned Fishes as Evident from Phylogeny of MC Receptors, Also Supported by a Few Other GPCRs
Source: PubMed Central journal article supplement (PMC3151243; doi:10.1371/journal.pone.0022046), 2011-08-05
Supplement: pone.0022046.s006.pdf [file pone.0022046.s006.pdf]

Figure S6.

|                  |                                                    |    |
|------------------|----------------------------------------------------|----|
| MC2R-Human       | -----MKHI----INSYE-NIN--NTARNNSDCPRVVLPEEIFF       | 32 |
| MC2R-Mouse       | -----MKHI----INSYE-HTN--DTARNNSDCPDVVLPEEIFF       | 32 |
| MC2R-Rat         | -----MKHI----INSYE-HTN--NTARNNSDCPDVVVPEEIFF       | 32 |
| MC2R-Opossum     | --ERASELIKILGHN----GNPPE-NIT--DNATNNTDCIQVVVPEEVFF | 41 |
| MC2R-Chicken     | MSTEKPFNLILSAHAGQTSIPSLE-NIT--DFSLNITDCNQVVVPEEVFF | 47 |
| MC2R-Turkey      | -----IKHAGQTSIPSLE-NIT--DFSLNITDCNQVVVPEEVFF       | 36 |
| MC2R-Zebrafinch  | MSTERPS--ILIKHPGQTSIPSLE-NIS--DFSLNITDCTQVVVPEEVFF | 45 |
| MC2R-AnoleLizard | -----VPEEIFF                                       | 7  |
| MC2R-Takifugu    | -----SSKLOVLKFTSLAMN-----ATTVNRSDCPEVNVPIHVFF      | 35 |
| MC2R-Tetraodon   | -----                                              | -  |
| MC2R-Sickleback  | -----MD-----TAAANRSDCPEVRVPVPLFF                   | 22 |
| MC2R-Medaka      | -----SNFEVMN-----TNSVNRTDCPEVKVPFLIFF              | 27 |
| MC2R-Zebrafish   | -----MNPSAE-----SPSSIHTDCAEVQVPGQVFL               | 26 |
| MC5R-Human       | -----MNSSFHLHFLDLNLNATEGNLSGPNVKNKSSPCEDMGIAVEVFL  | 44 |

|                  | TM1                                                   | TM2 |    |
|------------------|-------------------------------------------------------|-----|----|
| MC2R-Human       | TTISIVGVLENLIVLLAVFKNKNLQAPMYFFICSLAISDMLGSLYKILENI   |     | 82 |
| MC2R-Mouse       | TTISVIGILENLIIVLLAVIKNKNLQSPMYFFICSLAISDMLGSLYKILENI  |     | 82 |
| MC2R-Rat         | TTISIGVLENLIVLLAVIKNKNLQSPVYFFICSLAISDMLGSLYKILENI    |     | 82 |
| MC2R-Opossum     | ATSIIGVLENLLVLLAVIKNRNLHSPMYFFICSLAVSDMLGSLYKILENI    |     | 91 |
| MC2R-Chicken     | TVAAAGILENLLVAVIRNKNLHLPMYFFICSLAISDMLGSLYKTLENI      |     | 97 |
| MC2R-Turkey      | TVAAAGILENLLVAVIRNKNLHLPMYFFICSLAISDMLGSLYKTLENI      |     | 86 |
| MC2R-Zebrafinch  | TVAAAGILENLLILIAVVRNKNLHLPMYFFICSLAISDMLGSLYKTLENI    |     | 95 |
| MC2R-AnoleLizard | ITATLGLLENLLVLIIVGRNKNLHSPMYFFICSLAVSDMLGSLYKAVENI    |     | 57 |
| MC2R-Takifugu    | TTIGFVSLLENLLVIGAIISWRNRLHSPMYCFIGSLAAFNTIVASVTKTWENL |     | 85 |
| MC2R-Tetraodon   | -----V                                                |     | 1  |
| MC2R-Sickleback  | TTIGVVSIAENLLVVAVIRNRNLHSPMYCFICSLAAFNTIASLTKTWENL    |     | 72 |
| MC2R-Medaka      | TVGIVSLAENLLVLLAVILNRNLHSPMYCFICSLAAFNTIASLTKTWENL    |     | 77 |
| MC2R-Zebrafish   | VIAVASLSENLLVIVAVIKNKNLHSPMYCFICNLAVFNTISSFSKALENI    |     | 76 |
| MC5R-Human       | TLGVISLLENLILVIGAVKKNLHSPMYFFVCSLAVADMLVSMSSAWETI     |     | 94 |

|                  | TM3                                                 |     |
|------------------|-----------------------------------------------------|-----|
| MC2R-Human       | L-IILRNMGYLKPRGSFETTADDIIDSFLVLSLLGSIFSLSVIAADRYIT  | 131 |
| MC2R-Mouse       | L-IMFRNMGYLKPRGSFESTADDIIDCMFILSLLGSIFSLSVIAADRYIT  | 131 |
| MC2R-Rat         | L-IMFRNMGYLKPRGSLESTADDIIDCMFVLSLLGSIFSLSVIAADRYIT  | 131 |
| MC2R-Opossum     | L-IIFRNTGYLKPRGDFETTADDVVDSLFILSLLGSIFSLSVIAADRYIT  | 140 |
| MC2R-Chicken     | F-IILCKMGYLTRRGDFEKKLDDAMDSMFILSLLGSIFSLLAIAADRYIT  | 146 |
| MC2R-Turkey      | F-IILCKMGYLTRRGDFEKKLDDAMDSMFILSLLGSIFSLLAIAADRYIT  | 135 |
| MC2R-Zebrafinch  | F-IILCKMGYLTRRGDFEKKLDDAMDSMFILSLLGSIFSLLAIAADRYIT  | 144 |
| MC2R-AnoleLizard | FYIIFCKMQYVKCRGKLAKTMDDILDFFMILSLLGSIFSLSAIAADRYIT  | 107 |
| MC2R-Takifugu    | M-ITFAEVGHLRKVGFSEKADDVDSLLCMSFLGSIFSLAIAVDRYIT     | 134 |
| MC2R-Tetraodon   | M-IMFADVGHLRKVGYLELKLDDVDSLLCMSFLGSIFSLAIAADRYIT    | 50  |
| MC2R-Sickleback  | M-IVFANIGLEKKGPSSETNVDDVDSLLCMSFVGSIFSLAIAADRYIS    | 121 |
| MC2R-Medaka      | M-IVFADVGOLEKRGPSSETKLDMDMSLLCMSFVGSIFSLAIAVDRYIT   | 126 |
| MC2R-Zebrafish   | L-LLFKDAGRNLNSRGPPELKIIDDIMDSLLCMCFLGSIFSLAIAVDRYIS | 125 |
| MC5R-Human       | T-IYLLNKKHLVIADAFVRHIDNVFDSMICISVVASMSLLAIAVDRYIT   | 143 |

140c

(Numbering according to human MC5R)

|                  | TM4                                                  |     |
|------------------|------------------------------------------------------|-----|
| MC2R-Human       | IFHALRYHSIVTMRRTVVVLTVIWFCTGTGITMVI FSHHVPTVITFTSL   | 181 |
| MC2R-Mouse       | IFHALQYHSIVTMRRTIITLTI IWMFCTGSGITMVI FSHHIPTVLTFTSL | 181 |
| MC2R-Rat         | IFHALQYHSIVTMRRTVITLTVIWMFCTGSGITMVI FSHHIPTVLTFTSL  | 181 |
| MC2R-Opossum     | IFHALQYHNIMTMRRRAISILAI IWFCTGSGITMVI FSHDVPVVISFTSL | 190 |
| MC2R-Chicken     | IFYALRYHNIMTLQRALVILAI IWFCTAGSSIATALFSHEVATVIPFTIL  | 196 |
| MC2R-Turkey      | IFYALRYHNIMTVRRALVILAI IWFCTAGSSIATALFSHEIATVIPFTIL  | 185 |
| MC2R-Zebrafinch  | IFYALRYHNIMTLRRALVILAI IWFCTAGSSIATALFSYEAA TVIPFTIL | 194 |
| MC2R-AnoleLizard | IFYALRYHNIMTLKRALVMLGVIWAFCTGSGIAMVLSYEAVTVVSVTVL    | 157 |
| MC2R-Takifugu    | IFHALRYHNIMTMORTGAILGLI WTTTCGVSAMLMVRFDSNLMSCFVVF   | 184 |
| MC2R-Tetraodon   | IFHALRYHDIMTLORTGAILGVI WTTTCGVSAVLMVRFDSNLMGCFVVF   | 100 |
| MC2R-Sickleback  | IFHALRYHNIMTMRRTRAVLGV IWTTCGVSAVLMVRFDSNFIMICFVVF   | 171 |
| MC2R-Medaka      | IFNALRYHNIMTMORTGGILVVI WTTTCGVSAVLMVRFDFKFKIMICFVVF | 176 |
| MC2R-Zebrafish   | IFHALRYHMLTMRRVLIILFTI WVLCTSGALMVGFFEAATVKIFFIVL    | 175 |
| MC5R-Human       | IFYALRYHIMTARRSGAIIAGI WAFCTGCGIVFILYSESTYVILCLISM   | 193 |

|                  | TM5                                                                  |     |
|------------------|----------------------------------------------------------------------|-----|
| MC2R-Human       | FPIMLVFIFILCLYVHMFL LARSHTRKISTLP-----RANMKGAI                       | 219 |
| MC2R-Mouse       | FPIMLVFIFILCLYIHMFL LARSHARKISTLP-----RTNMKGAM                       | 219 |
| MC2R-Rat         | FPIMLVFIFILCLYIHMFL LARSHARKISTLP-----RANMKGAM                       | 219 |
| MC2R-Opossum     | FPIMLVFIFILCLYVHMFL LARSHAKKIISLPSS-RVQP-----RANMKGAI                | 234 |
| MC2R-Chicken     | FPIMLVFIFILCLYIHMFL LARSHAKKIASLPTS-AVHQ-----RTNMKGAI                | 240 |
| MC2R-Turkey      | FPIMLVFIFILCLYIHMFL LARSHAKKIASLPTG-AVHQ-----RTNMKGAI                | 229 |
| MC2R-Zebrafinch  | FPIMLVFIFILCLYIHMFL LARTHAKKIASLPS--TIHH-----RTNMKGAI                | 237 |
| MC2R-AnoleLizard | FCFMLVIFILCLYIHMFL LARSHAKKIALMTTS-SVHQ-----GANMKGAI                 | 201 |
| MC2R-Takifugu    | FVHSLAIVYILYVVMF ILARVHARKIAALPNGSGKHQHQR <sup>230c</sup> RWGHGMRGIL | 234 |
| MC2R-Tetraodon   | FVHSLVIVYILYVVMF ILSRVHARRIAALPGGSGKHQHLLRRWNGMRGIM                  | 150 |
| MC2R-Sickleback  | FVHSLAIVICFLYVVMFLAR ITHAKSIALPAS-----NGMRGAL                        | 210 |
| MC2R-Medaka      | FIVSLAIVICFLYVVMFLAR ITHAKSIALP-----                                 | 206 |
| MC2R-Zebrafish   | FFTALLIILLYVHMFL LARHARRIASMPGAQAQHRK-----SGLRGAL                    | 220 |
| MC5R-Human       | BFAMFLVLSLYIHMFL LARTHVKRIAALPGASSARQ-----RTSMQGA V <sup>236a</sup>  | 238 |

|                  | TM6                                                  | TM7 |     |
|------------------|------------------------------------------------------|-----|-----|
| MC2R-Human       | TLTILLGVFIFCWAPFVLH VLLMTFCPSNPYCACYMSLFOVNGMLIMCNA  |     | 269 |
| MC2R-Mouse       | TLTILLGVFIFCWAPFVLH VLLMTFCPNNPYCVCYMSLFOVNGMLIMCNA  |     | 269 |
| MC2R-Rat         | TLTILLGVFIFCWAPFVLH VLLMTFCPNNPYCVCYMSLFOVNGMLIMCNA  |     | 269 |
| MC2R-Opossum     | TLTILLGVFLCCWAPFVLH ILLVTFCPNNPYCACYLSIFOVNGMLIMCNA  |     | 284 |
| MC2R-Chicken     | TLTIFLGVFLCCWAPFVLH ILLARFCPHNPYCACYMSIFHVNGTLIMCNA  |     | 290 |
| MC2R-Turkey      | TLTIFLGVFLCCWAPFVLH ILLARFCPHNPYCACYMSIFHVNGTLIMCNA  |     | 279 |
| MC2R-Zebrafinch  | TLTIFLGVFLCCWAPFVLH ILLARFCPHNPYCACYMSIFHVNGTLIMCNA  |     | 287 |
| MC2R-AnoleLizard | TLTVLVAVFLFCWSPFVLH MLLMTFCPONPYCICYGSIFHVHGMLIMCNA  |     | 251 |
| MC2R-Takifugu    | TLTILFGAFMVCWAPFVLH LILFLMACPMNPYCECYRSMFOLHLVLLMSHA |     | 284 |
| MC2R-Tetraodon   | TLTILFGAFMVCWAPFVLH LILFLMVCPMNPYCECYRSLFELHVLLMSHA  |     | 200 |
| MC2R-Sickleback  | TLTILFGAFVVCWAPFVLH LILFLMVCPTNPYCECYRSLFOLHVLLMSHA  |     | 260 |
| MC2R-Medaka      | -----                                                |     | -   |
| MC2R-Zebrafish   | TLTILIGVFAVCWAPFSLH LLLIMICPENPYCECYRSLFOLHVLLVSHA   |     | 270 |
| MC5R-Human       | TVTMLLGVFTVCWAPFVLH LTLMLSCPONLYCSRFSHFNMYLILIMCNS   |     | 288 |

|                  |                                                    |     |
|------------------|----------------------------------------------------|-----|
|                  |                                                    |     |
| MC2R-Human       | VIDPFIYAFRSPELRDAFKKMFCSRYW-----                   | 297 |
| MC2R-Mouse       | VIDPFIYAFRSPELRDAFKRMLFCNRY-----                   | 296 |
| MC2R-Rat         | VIDPFIYAFRSPELRDAFKRMLFCNRY-----                   | 296 |
| MC2R-Opossum     | IIDPMIYAFRSPELRSTFKKMFCCSGYK-----                  | 312 |
| MC2R-Chicken     | IIDPMIFAFRSPELRSTFKKMFCCARYNWNWWKLNEGEYYRSTPMQHFFA | 340 |
| MC2R-Turkey      | IIDPMIFAFRSPELRSTFKKMFCCARHNW-----                 | 308 |
| MC2R-Zebrafinch  | IINPMIFAFRSPELRSTFKKMFYCSRSNCSW-----               | 318 |
| MC2R-AnoleLizard | VIDPMIYAFRSPELRSTFRRFISCSY-----                    | 277 |
| MC2R-Takifugu    | LIDPVIYAFRIPELRHTFRMLPCLNWR-----                   | 312 |
| MC2R-Tetraodon   | LIDPGIYAFRIPELRHTFRMLLCLNWRLSLT-----               | 232 |
| MC2R-Sickleback  | FIDPAIYAFRSVELRHTFRKMLLCSDWKRCS-----               | 291 |
| MC2R-Medaka      | -----                                              | -   |
| MC2R-Zebrafish   | VIDPAIYAFRSVELRNTYKMLLSASRICKRCA-----              | 304 |
| MC5R-Human       | VMDPLIYAFRSQEMRKTFKEIICRGFRIACSFPRRD-----          | 325 |

|                  |                   |     |
|------------------|-------------------|-----|
| MC2R-Human       | -----             | -   |
| MC2R-Mouse       | -----             | -   |
| MC2R-Rat         | -----             | -   |
| MC2R-Opossum     | -----             | -   |
| MC2R-Chicken     | ELKILTQNDTTLAGNCQ | 357 |
| MC2R-Turkey      | -----             | -   |
| MC2R-Zebrafinch  | -----             | -   |
| MC2R-AnoleLizard | -----             | -   |
| MC2R-Takifugu    | -----             | -   |
| MC2R-Tetraodon   | -----             | -   |
| MC2R-Sickleback  | -----             | -   |
| MC2R-Medaka      | -----             | -   |
| MC2R-Zebrafish   | -----             | -   |
| MC5R-Human       | -----             | -   |
