# Supplementary material for: Spliceosomal Intron Insertions in Genome Compacted Ray-Finned Fishes as Evident from Phylogeny of MC Receptors, Also Supported by a Few Other GPCRs
Source: PubMed Central journal article supplement (PMC3151243; doi:10.1371/journal.pone.0022046), 2011-08-05
Supplement: pone.0022046.s007.pdf [file pone.0022046.s007.pdf]

Figure S7.

|                    |   |                                                    |    |
|--------------------|---|----------------------------------------------------|----|
| MC5R-Human         | 1 | -----MNSSFHLHFLDLNLNATEGNLSGPNVK-NKSSPCEDM         | 36 |
| P2Y2-Human         | 1 | -----MAADLGPWNDTINGTWGDDELGYRCRFNEDFKYVLL          | 36 |
| P2Y2-Takifugu      | 1 | -----INP--LYCKFOEDFKYILL                           | 17 |
| P2Y2-Tetraodon     | 1 | -----MVALDNATVDP--LYCKFKEDFKYILL                   | 25 |
| P2Y2-Medaka        | 1 | RALPSAVNLVNLASAGVSTSNMNASGLNLTENNRSRDFCRFNEDFKFILL | 50 |
| P2Y2-1-Stickleback | 1 | -----IFITKMATWDNNVTSQTNYSN--FYCRFEERFKYILL         | 35 |
| P2Y2-2-Stickleback | 1 | -----WDNNVTSQTNYSN--FYCRFEERFKYILL                 | 27 |
| P2Y2-1-Danio       | 1 | -----MATFNNTTIA-NASDL--YSCIFDETFKYILL              | 29 |
| P2Y2-2-Danio       | 1 | -----MAAFNNTGPT-NGSNE--TDCDLQDDFKHILL              | 29 |
| P2Y2-3-Danio       | 1 | ----MICFLCLNLRQIWIRMAMNNTTVSTNDIDI--YRCTLKEDFKYILL | 44 |
| P2Y2-Callorhinchus | 1 | -----YNCTFNEEFKYILL                                | 14 |

|                    |    |     |                         |                                       |        |    |
|--------------------|----|-----|-------------------------|---------------------------------------|--------|----|
|                    |    | TM1 |                         | TM2                                   |        |    |
| MC5R-Human         | 37 | GI  | AVEVFLTLGVISLLENILVIGAI | VKKNLHSPMYFFVCSLAVADMI                | VS     | 86 |
| P2Y2-Human         | 37 | PVS | YGVVCPG---              | LCLNAVALYIFLCRLKTWNASTTYMFHLAVSDALYA  |        | 83 |
| P2Y2-Takifugu      | 18 | PVS | YALVFVFG---             | LALNGTALYVIVFRTRLWKPSTIYMFNLTMCDTLYI  |        | 64 |
| P2Y2-Tetraodon     | 26 | PVS | YALVFVFG---             | LALNGLALYVIVFRTRKAWKPSIVYMFNLTMCDTLYI |        | 72 |
| P2Y2-Medaka        | 51 | PVS | YALVFVFG---             | LALNFTALFVMVFRTRKHWKPSIYMFNLTMCDTLYI  |        | 97 |
| P2Y2-1-Stickleback | 36 | PVS | YSLVFVIG---             | LALNATALYVMLFRTKRWKSSTIYMFNLTVCDTLYV  |        | 82 |
| P2Y2-2-Stickleback | 28 | PVS | YSLVFVIG---             | LALNATALYVMLFRTKRWKSSTIYMFNLTVCDTLYV  |        | 74 |
| P2Y2-1-Danio       | 30 | PVS | YSLVFVFG---             | LGLNITAMYVILFRTKOWKPNTIYMINLNACDTLYI  |        | 76 |
| P2Y2-2-Danio       | 30 | PVS | YSLVFVFG---             | LGLNITAMYFIFFRTKOWKPNTIYIINLSICDTLYI  |        | 76 |
| P2Y2-3-Danio       | 45 | PVS | YSLVFVFG---             | LGLNITAMYFILFOTKHWKPNTIYMINLNACDTLYI  |        | 91 |
| P2Y2-Callorhinchus | 15 | PVS | YGVIVFVVG---            | LVLNCLAIWVVFVRMRPWNTTITTYMFNLAI       | SDTMYV | 61 |

|                    |    |     |                      |                                 |       |     |
|--------------------|----|-----|----------------------|---------------------------------|-------|-----|
|                    |    |     |                      | 124a                            |       |     |
|                    |    |     |                      | TM3                             |       |     |
| MC5R-Human         | 87 | MSS | AWETITITVLLN         | NKHLVIADAFVRHIDNVFDSMICISVVASMC | SLLAI | 136 |
| P2Y2-Human         | 84 | ASL | PL--LVYYYARGDHWPF    | STVLCCLVRFVLYTNLYCSILFLTC---    | I     | 127 |
| P2Y2-Takifugu      | 65 | LTL | PF--LIYYYADENDWPF    | SEPLCKIIRFLFYANLYGSILFLCC---    | I     | 108 |
| P2Y2-Tetraodon     | 73 | LTL | PF--LIYYYADENDWPF    | SEPFCKIIRFLFYANLYGSILFLCC---    | I     | 116 |
| P2Y2-Medaka        | 98 | FTL | PF--LIFYYADENDWPF    | TEPLCKMIRFLFYSNLYGSILFMCC---    | I     | 141 |
| P2Y2-1-Stickleback | 83 | LTL | PF--LIYYYADENDWPF    | SEPLCKIIRFLFYTNLYGSIMFLCC---    | I     | 126 |
| P2Y2-2-Stickleback | 75 | LTL | PF--LIYYYADENDWPF    | SEPLCKIIRFLFYTNLYGSIMFLCC---    | I     | 118 |
| P2Y2-1-Danio       | 77 | LTL | PF--LIYYYADENAWPF    | GELMCKLIRFLFYTNLYGSILFLSC---    | I     | 120 |
| P2Y2-2-Danio       | 77 | LTL | PF--LIYYYADESDWPF    | GEAMCKFIRFLFYTNLYGSILFLSC---    | I     | 120 |
| P2Y2-3-Danio       | 92 | LTL | PF--LIYYYAGANAWPF    | GDPMCRFIRFFYTNLYGSILFLSC---     | I     | 135 |
| P2Y2-Callorhinchus | 62 | ISL | PL--LVYYYARRNWPFGAAL | CKIVRFLFYTNLYCSILFLTC---        | M     | 105 |

|                    |     |     |                               |                   |        |     |
|--------------------|-----|-----|-------------------------------|-------------------|--------|-----|
|                    |     |     |                               | 181c              |        |     |
|                    |     | ### |                               | TM4               |        |     |
| MC5R-Human         | 137 | AVD | RYVTFYALRYHHIMTARRSGAIIAGI    | WAF---CTGCGIVFILI | YSES   | 183 |
| P2Y2-Human         | 128 | SVH | RCLGVLRPLRSLRWGRARYARRVAGAVWV | LVLACQAPVLYFV     | TTSAR  | 177 |
| P2Y2-Takifugu      | 109 | SLH | RFIGICYPVRSLYWLSARRAKFISAAV   | WGVVLCQGPVLYFS    | RIRDK  | 158 |
| P2Y2-Tetraodon     | 117 | SLH | RFIGVCPVRSLYWLSARRAKFISAVAV   | WVLSQSPVLYFS      | RIRDK  | 166 |
| P2Y2-Medaka        | 142 | SLH | RFIGICFPVRSLSWVSTRRARLVSAV    | WASVLFQCGPVLYFS   | RTRST  | 191 |
| P2Y2-1-Stickleback | 127 | SLH | RFIGVCPVRSLSWVSARRAKLVSAV     | WACVLLCQAPILYFS   | RTSKS  | 176 |
| P2Y2-2-Stickleback | 119 | SLH | RFIGVCPVRSLSWVSARRAKLVSAV     | WACVLLCQAPILFF    | TRTSVR | 168 |
| P2Y2-1-Danio       | 121 | SVH | RFIGVCHPVRSLSWTNARRARFISL     | CIWATMLIFQAPILYFS | RMKSD  | 170 |
| P2Y2-2-Danio       | 121 | SVH | RFIGVCHPVRSLSLNTQYARIVSV      | GIWVILILQAPILFF   | SRTTQK | 170 |
| P2Y2-3-Danio       | 136 | SVH | RFIGVCHPVRSLSWMNARRARWISV     | GIWLIILILQTPLLYFS | RTLNL  | 185 |
| P2Y2-Callorhinchus | 106 | SIH | RFLGVCFPMESLRWVKVRNTRIVCAV    | VWVIVIMCQAPILAFV  | TTEDEK | 155 |

**TM5**

|                    |     |                                                      |     |
|--------------------|-----|------------------------------------------------------|-----|
| MC5R-Human         | 184 | TYV-ILC-----LISMFF----AMLFLLVSLYIHMFLLRARTHVKRIAA    | 221 |
| P2Y2-Human         | 178 | GGR-VTCHDTSAPELFSRFVAYSSVMLGLLFAVPPFAVILVCYVLMARRLL  | 226 |
| P2Y2-Takifugu      | 159 | NSS-RTCYDITTSPELFDDFLVYSSVISVLMFALPFMVVLCNGLMVRKLL   | 207 |
| P2Y2-Tetraodon     | 167 | NSS-RICVDITTSPELFDDFLVYSSVISVLMFALPFMIVMVCNGLMVRKLL  | 215 |
| P2Y2-Medaka        | 192 | TTKQIICVDITTSPELFDDFLVYSSVISVLMFALPFMVLMVCYGLMVRKLL  | 241 |
| P2Y2-1-Stickleback | 177 | ESV-RICVDITTSPELFDDFLVYSSVISVLMFALPFMVVMVCYGLMVRKLL  | 225 |
| P2Y2-2-Stickleback | 169 | EGK-RICVDITTSPELFDDFLVYSSVISVLMFALPFMVVMVCYGLMVRKLL  | 217 |
| P2Y2-1-Danio       | 171 | T---MVCYDITTSPELFDDFLVYSSVVMLELLFVLPFGVVLVCNAMMVKKLR | 217 |
| P2Y2-2-Danio       | 171 | KD--IVCHDITTSPELFDDFLVYSSVVMLELLFGLPFVVLVCNAMMVKKLR  | 218 |
| P2Y2-3-Danio       | 186 | DEV-LVCHDITTSPELFDDFLVYSSVVMLELLFVLPFGVVLVCNFLIVKKLR | 234 |
| P2Y2-Callorhinchus | 156 | GTN-TLCYDITTSRENFNQFVIYNMVQLVLLFCGPFVIVMVCYWFMTKELL  | 204 |

**TM6**

|                    |     |                                                     |     |
|--------------------|-----|-----------------------------------------------------|-----|
| MC5R-Human         | 222 | LPGASS-----ARORTSMOGAVTVTMLLGVFTVCWAPFFLHLTLMLS     | 263 |
| P2Y2-Human         | 227 | KPAYGT-----SGGLPRAKRKSVRTIAVVLAVFALCFLPFHVTRTLIYS   | 270 |
| P2Y2-Takifugu      | 208 | EFSWRS-----EGRAEGKSVKMI IIVLATFMLCFLPFHLTRSLIYS     | 248 |
| P2Y2-Tetraodon     | 216 | EVSWRS-GAKRGNLSARQSRQKSVKMI IIVLATFMLCFLPFHLTRSLIYS | 264 |
| P2Y2-Medaka        | 242 | EPGWGP-GGE--VLTAORTKOKSVKMI IIVLAAFMLCFLPFHLTRSLIYS | 288 |
| P2Y2-1-Stickleback | 226 | EPGWASEGGERGGLSARRLKOKSVKMI IIVLATFMICFLPFHLTRSLIYS | 275 |
| P2Y2-2-Stickleback | 218 | EPGWASEGGTRGGLSARRLKOKSVEMI IIVLAMFILCFLPFH-----    | 259 |
| P2Y2-1-Danio       | 218 | EPGVGD-----GPMSQKSKOKSVKMI IIVLVAFMLCFLPFHVNRSIYYG  | 261 |
| P2Y2-2-Danio       | 219 | EPRVGG-----GSTSORSKOKSVKMI IIVLLTFILCFLPFHVNRIVHYT  | 262 |
| P2Y2-3-Danio       | 235 | EPGVGD-----APTSORSKOKSVKMI IIVLVAFMLCFLPFHVNRSVYYT  | 278 |
| P2Y2-Callorhinchus | 205 | RPNTAH-----PENSRSRKSIKMIIVILSVFVLCFLPFHITRSIYS      | 247 |

267a

**TM7**

|                    |     |                                                     |     |
|--------------------|-----|-----------------------------------------------------|-----|
| MC5R-Human         | 264 | CPO-----NLYCSRFSHFNMVLI---LIMCNSVMDPLIYAFRSQEM      | 302 |
| P2Y2-Human         | 271 | FRSL-----DLSCHTLEINMAYKVTRPLASANSCLDPVLYFLAGQRL     | 313 |
| P2Y2-Takifugu      | 249 | FRYLRLQISP-QOITCNTLEAINVAYKVTRPLASANSCLDPILYFLAGQDI | 297 |
| P2Y2-Tetraodon     | 265 | FRYLIR-----OITCGMLEAINVAYKVTRPLASANSCLDPILYFLAGQDI  | 308 |
| P2Y2-Medaka        | 289 | LRYLR-----KVSCSLESSVAYKVTRPLASANSVDPILYFLAGQGT      | 332 |
| P2Y2-1-Stickleback | 276 | FRYLRLQVDPSQA-----SSVAYKVTRPLASTNSCVDPILYFLAGQNR    | 318 |
| P2Y2-2-Stickleback | -   | -----                                               | -   |
| P2Y2-1-Danio       | 262 | FRYLDK----QVSCSMLEIASMAYKITRPLASANSCLDPILYFMAGQGFK  | 307 |
| P2Y2-2-Danio       | 263 | LRYM-----DRSCDQLRLSNIIYQATRPLLSINSCIDPILYFMAGQSFR   | 306 |
| P2Y2-3-Danio       | 279 | LRYLD-----QANCTVIRLSNNVYKATRPLVSNFNSCIDPILYFMAGQSFR | 323 |
| P2Y2-Callorhinchus | 248 | SRSIL-----HLSCTLENAVNLAYKLTRPLASANSCLDPILYVLAGO---  | 288 |

|                    |     |                                                  |     |
|--------------------|-----|--------------------------------------------------|-----|
| MC5R-Human         | 304 | RKTFKEIICCRGFRIACSFPRD-----                      | 325 |
| P2Y2-Human         | 315 | VRFARDAKPPGSPATPARRRLGLRRSDRTDMQRIEDVLGSSSEDSRRT | 363 |
| P2Y2-Takifugu      | 299 | RSNLTKKSRTTTHKAGMKMCERKHROIATMLHTAVTSPFMTS-----  | 339 |
| P2Y2-Tetraodon     | 310 | RSNLTKKCR TANQKLT-----                           | 325 |
| P2Y2-Medaka        | 334 | RSSFIR-----                                      | 338 |
| P2Y2-1-Stickleback | 319 | SSLTKKIR-----                                    | 326 |
| P2Y2-2-Stickleback | -   | -----                                            | -   |
| P2Y2-1-Danio       | 308 | SSIKRNKSPVARSGKPPSTSL-----                       | 329 |
| P2Y2-2-Danio       | 307 | NNSTRSNPSSERSISTV-----                           | 323 |
| P2Y2-3-Danio       | 324 | KSIKKTSSQRYDKSMSTY-----                          | 341 |
| P2Y2-Callorhinchus | -   | -----                                            | -   |

|                    |     |                |     |
|--------------------|-----|----------------|-----|
| MC5R-Human         | -   | -----          | -   |
| P2Y2-Human         | 364 | STPAGSENTKDIRL | 377 |
| P2Y2-Takifugu      | -   | -----          | -   |
| P2Y2-Tetraodon     | -   | -----          | -   |
| P2Y2-Medaka        | -   | -----          | -   |
| P2Y2-1-Stickleback | -   | -----          | -   |
| P2Y2-2-Stickleback | -   | -----          | -   |
| P2Y2-1-Danio       | -   | -----          | -   |
| P2Y2-2-Danio       | -   | -----          | -   |
| P2Y2-3-Danio       | -   | -----          | -   |
| P2Y2-Callorhinchus | -   | -----          | -   |
