# Supplementary material for: Spliceosomal Intron Insertions in Genome Compacted Ray-Finned Fishes as Evident from Phylogeny of MC Receptors, Also Supported by a Few Other GPCRs
Source: PubMed Central journal article supplement (PMC3151243; doi:10.1371/journal.pone.0022046), 2011-08-05
Supplement: pone.0022046.s008.pdf [file pone.0022046.s008.pdf]

Figure S8.

|                    |     |                                   |                                           |       |     |
|--------------------|-----|-----------------------------------|-------------------------------------------|-------|-----|
|                    |     |                                   | <b>TM1</b>                                |       |     |
| MC5R-Human         | 1   | MNSSFHLHFLDLNLNATEGNLS            | SGPNVKNKSSP-CEDMGIAVEVFLITIG--            | 47    |     |
| P2Y3-Gallus        | 1   | -----MSMANFTGGRNS-                | CTFH EEFKQVLLPLVYS                        | 29    |     |
| P2Y3L-Takifugu     | 1   | -----PPHVGVTILQEFAGTFS            | PPPSGTHQPPSCSIDESYKYIFLPI CYS             | 45    |     |
| P2Y3L-Medaka       | 1   | -----STNISAAVIQDVLSSPYSTYSSTHSTSS | CSIDESYKYIFLPI CYS                        | 45    |     |
| P2Y3L-Stickleback  | 1   | -----SSTPSTTTPSPS-                | CSIDESYKYIFLPI CYS                        | 29    |     |
| P2Y3L-Danio        | 1   | RSLRTMTTSWIETVTGV DARLS           | SSANS SSGNGT-CNIDESYKYIFLPI CYS           | 49    |     |
| P2Y3-Callorhinchus | 1   | -----                             | CPLYEDYKHTLLPVTYS                         | 17    |     |
|                    |     |                                   | <b>TM2</b>                                |       |     |
| MC5R-Human         | 48  | ---VISLLENILVIGAI                 | VKNKNLHSPMYFFVCSLAVADMLVSMSSAWETI         | 94    |     |
| P2Y3-Gallus        | 30  | VVFLGLPLNAVIGQI                   | WLARKALTRTTIYMLNLA MADLLVCS--LPLI         | 77    |     |
| P2Y3L-Takifugu     | 46  | FTFIFSISLNSVILYRS                 | VCRTKRWNASLIYMNLA TDFMYGLS--LPFL          | 93    |     |
| P2Y3L-Medaka       | 46  | FTFIFSITLNSVVL YRSFR-             | TKRWNTSLIYMNLA TDFMYGLS--LPFL             | 92    |     |
| P2Y3L-Stickleback  | 30  | FTFIFSISLNSVIL YRSFR              | TKRWNP SLIYMNLA TDFMYGLS--LPFL            | 77    |     |
| P2Y3L-Danio        | 50  | FTFVFSITLNFVVL YRSFR              | RRRWNASLIYMNLA TDFMYGLS--LPFL             | 97    |     |
| P2Y3-Callorhinchus | 18  | LVFLLGLTLNGAVL                    | CLSWRLTRKWS CSTIYLVNLA VADLLVCS--LPLI     | 65    |     |
|                    |     |                                   | <b>TM3</b> ###                            |       |     |
| MC5R-Human         | 95  | TIYLLNNKHLVIADAF                  | VRHIDNVFDSMICISVVASMC SLLAIAVD RYVTI      | 144   |     |
| P2Y3-Gallus        | 78  | IYNYTQKDYWPF                      | GDFLCKFVRFQF----YTNLHGSILFLTCISVQRYMGI    | 123   |     |
| P2Y3L-Takifugu     | 94  | VASYIMRDCWVF                      | GDFMCRLVRF LF----YFNLYCSIFFLTCISVHRYLGI   | 139   |     |
| P2Y3L-Medaka       | 93  | IASYIMODRWIF                      | GDFMCRLVRF LF----YFNLYCSIFFLTCISVHRYLGI   | 138   |     |
| P2Y3L-Stickleback  | 78  | VASYVMRDRWVF                      | GDFMCRLVRF LF----YFNLYCSIFFLTCISVHRYLGI   | 123   |     |
| P2Y3L-Danio        | 98  | VASYIMODDWVF                      | GDFMCRLVRF LF----YFNLYCSIFFLTCISVHRYLGI   | 143   |     |
| P2Y3-Callorhinchus | 66  | ILNYIWRDRWPF                      | GDFLCLVRF LF----YANLYGSILFLTCISVHRYLGL    | 111   |     |
|                    |     |                                   | <b>TM4</b>                                | 187c  |     |
| MC5R-Human         | 145 | FYAL-RYHHIMTARR                   | SGAIIAGIWFCTGCGIVFILYSESTYV--I----        | 187   |     |
| P2Y3-Gallus        | 124 | CHPLASWHKKK                       | GKLTWLVC AAVWFIVIAOCLPTFVFASTGTQRNR---T   | 170   |     |
| P2Y3L-Takifugu     | 140 | CHPM-RVITLET                      | TKKAVKCTCVVWIVVFALTCPIFRFAQTGYVSR---R     | 185   |     |
| P2Y3L-Medaka       | 139 | CHPM-KVISLET                      | TKKTVKYTCVLVWIVVFALTCPIFRFAQTGCVT-S---V   | 183   |     |
| P2Y3L-Stickleback  | 124 | CHPM-KVITLET                      | TKKAVKSTCVLVWIVVFALTCPIFRFAQTG---E----    | 164   |     |
| P2Y3L-Danio        | 144 | CHPM-KTITLET                      | SKRAVKGTCVLVWIVVFALTCPIFRFAQTYLPREGKGT    | 192   |     |
| P2Y3-Callorhinchus | 112 | CFPM-KSIEWR                       | TRRLAVETCVVAWIMVGLQVVP TYLYAHTGSLANK---T  | 157   |     |
|                    |     |                                   | <b>TM5</b>                                |       |     |
| MC5R-Human         | 188 | L-----CL-----                     | ISMFFAMFLVSLYIHMFL LARTHVKRIAAL           | 222   |     |
| P2Y3-Gallus        | 171 | V-----CYDLSPPDR                   | STSYFPYGITLITIGFLLPFAAILACYC SMARIL       | 214   |     |
| P2Y3L-Takifugu     | 186 | VVEEYQNCWDDA                      | IDKEFPDYIPYGITLHLLGFFVFPFSIIA WCYSHVVLT I | 235   |     |
| P2Y3L-Medaka       | 184 | VIEQYQNCWDDA                      | IDKEFPVYVPYGITLHLLGFFVFPFSIIA WCYSHVVLT I | 233   |     |
| P2Y3L-Stickleback  | 169 | ----YRNCWDDA                      | IDKEFPDYVPYGITLHLLGFFVFPFSIIA WCYSHVVLT I | 214   |     |
| P2Y3L-Danio        | 193 | REEVFNNCWDDA                      | IDREFHDYIPYGVTLHFLGFFMPFSIIA WCYSRVVLT I  | 242   |     |
| P2Y3-Callorhinchus | 158 | V-----CYDLTSPDN                   | FHNLYLPYGTVLTITG FVIPFVIL ILSYCCIIKTL     | 201   |     |
|                    |     | S212a                             | M234a                                     | T252a |     |
| MC5R-Human         | 223 | -----                             | PGAS SAR-----                             | QRTSM | 234 |
| P2Y3-Gallus        | 215 | -----                             | CQKDELIGLAVHKKKD                          |       | 230 |
| P2Y3L-Takifugu     | 236 | FR-----                           | TLHSQPS SYRIPRGK SRRR                     |       | 256 |
| P2Y3L-Medaka       | 234 | -----                             | CAHSPY-----                               | ANRRR | 244 |
| P2Y3L-Stickleback  | 212 | RRR-----                          | DEGTSIFLGAHSPY-----                       | ANRRR | 233 |
| P2Y3L-Danio        | 243 | FRTLNSEPPSQR                      | ARS GTGRESVAGIGGEGMSI ILGARS PY-----      | VNRRR | 287 |
| P2Y3-Callorhinchus | 202 | -----                             | IVSGDSTQLQ----                            | KPVRT | 216 |

|                    |     | <b>TM6</b>                                             |  |     |
|--------------------|-----|--------------------------------------------------------|--|-----|
| MC5R-Human         | 235 | OGAVIVTMLGVTVCWAPFFLHLT--LMLSCPONLYCSRFMSHFNMVLI       |  | 282 |
| P2Y3-Gallus        | 231 | KAVRMIIIVVIVFSISFFPFHLTKTIYLIVRSSASLPCPTLQAFATAYKC     |  | 280 |
| P2Y3L-Takifugu     | 257 | KSIIKTIITITLLFALCFPPFHVTRTIFLLLKVAKGVPCHTMTTVSMCYKI    |  | 306 |
| P2Y3L-Medaka       | 245 | KSIRTIITATLLFALCFPPFHVTRTIIVLLLKVSRRVPCHTMTTIVSICYKI   |  | 294 |
| P2Y3L-Stickleback  | 234 | KSIIKTIITITLLFALCFPPFHVTRTIFLVLKVTKGVPCHTMTTVSMCYKI    |  | 283 |
| P2Y3L-Danio        | 288 | KSIIKTIITITLLFALCFPPFHVTRTIFLLLKLTSRVQCHTMRMVSICYKI    |  | 337 |
| P2Y3-Callorhinchus | 217 | KSIRTIIVLVCGLLAVCFVPPFHITRTIYLFVFRAYLAQDCNIILOTVSLAYKI |  | 266 |

|                    |     | <b>TM7</b>                                         |  |     |
|--------------------|-----|----------------------------------------------------|--|-----|
| MC5R-Human         | 283 | ---LIMCNSVMDPLIYAFRSQEMRKFKEIICCRGFR-----IA        |  | 318 |
| P2Y3-Gallus        | 281 | TRPFASMNSVLDPIILFYFTQRFRESTRYLLDKMSSK-----WRQDHC   |  | 323 |
| P2Y3L-Takifugu     | 307 | TRPLASFNAWLNALLYFLTKD-----                         |  | 327 |
| P2Y3L-Medaka       | 295 | TRPLASFNAWLNALLYFLTKDKMG-----NHCCQAANTTSQ---QREGLL |  | 336 |
| P2Y3L-Stickleback  | 284 | TRPLASFNAWLNALLYFLTKDK-----                        |  | 305 |
| P2Y3L-Danio        | 338 | TRPLASFNAWLNALLYFLTKDKNG-----PCCQKPEHAQHGLLWPLRML  |  | 381 |
| P2Y3-Callorhinchus | 267 | WRPVIISFNSCINPLLYFLSGD-----                        |  | 287 |

|                    |     |         |     |
|--------------------|-----|---------|-----|
| MC5R-Human         | 319 | CSFPRRD | 325 |
| P2Y3-Gallus        | 324 | ISYGS-- | 328 |
| P2Y3L-Takifugu     | -   | -----   | -   |
| P2Y3L-Medaka       | 337 | LPLRIMD | 343 |
| P2Y3L-Stickleback  | -   | -----   | -   |
| P2Y3L-Danio        | 382 | GKGEEEE | 388 |
| P2Y3-Callorhinchus | -   | -----   | -   |
