# Supplementary material for: Spliceosomal Intron Insertions in Genome Compacted Ray-Finned Fishes as Evident from Phylogeny of MC Receptors, Also Supported by a Few Other GPCRs
Source: PubMed Central journal article supplement (PMC3151243; doi:10.1371/journal.pone.0022046), 2011-08-05
Supplement: pone.0022046.s009.pdf [file pone.0022046.s009.pdf]

**Figure S9.**

|                 |   |                                                    |    |
|-----------------|---|----------------------------------------------------|----|
| MC5R-Human      | 1 | -----MNSS-----FHLHFLDLNLNATEGNL                    | 21 |
| P2Y6-Human      | 1 | -----MAAD-----LGPWNDTINGTWDGDE                     | 20 |
| P2Y6-Takifugu   | 1 | -----FFTEGVISLTSLDFASSEPF TGPNTHNI IKGI            | 32 |
| P2Y6-Tetraodon  | 1 | -----MPGSAHLGPFLTESVIRTSLAFPSSEPFADLNNTNNTN-       | 40 |
| P2Y6-Medaka     | 1 | -----TEPY-----GADIFSVGNSSSVAET                     | 20 |
| P2Y6-Sickleback | 1 | LGNPLLFSRRLLAGSVHLFQTASCEWETETLISDSFPSDSFSTSAWPPET | 50 |
| P2Y6-Danio      | 1 | -----LKMD-----SLNVSTM                              | 11 |

|                 |    |                                                   |            |    |
|-----------------|----|---------------------------------------------------|------------|----|
|                 |    |                                                   | <b>TM1</b> |    |
| MC5R-Human      | 22 | SGPN-----VKNKSSPCEDMG--IAVEVFLTLGVISLLENIL        |            | 56 |
| P2Y6-Human      | 21 | LGYR-----CRFN----EDFKYVLLPVSYGVVVCVPGLCNAV        |            | 53 |
| P2Y6-Takifugu   | 33 | SNSN-----CTYK----EDFKRILLPTVYTMVCLLGLPLNTV        |            | 65 |
| P2Y6-Tetraodon  | 41 | -----CTYK----EDFKRILLPAVYTLVLLGLPLNAV             |            | 69 |
| P2Y6-Medaka     | 21 | ASPR-----CTYK----EDFKOILLPAVYSIVFLLGFPNAA         |            | 53 |
| P2Y6-Sickleback | 51 | YAADGFVANVSVSGALRCTYK----EDFKRILLPAVYTLVFLGLPLNVA |            | 96 |
| P2Y6-Danio      | 12 | ALPS-----CTYK----EDFKRFLLPVYSLVFIIFGLPLNFI        |            | 44 |

|                 |    |                                                     |            |     |
|-----------------|----|-----------------------------------------------------|------------|-----|
|                 |    |                                                     | <b>TM2</b> |     |
| MC5R-Human      | 57 | VIGAVKKNKLNHSPMYFFVCSLAVADMLVSMSSAWETITIIYLLNNKHLVI |            | 106 |
| P2Y6-Human      | 54 | ALYIFLCRLKTWNASTTYMFHLAVSDALYAAS--LPLLVIYYVARGDHWPF |            | 101 |
| P2Y6-Takifugu   | 66 | VILKIWRARPNSRSNIYMLNLAIAADFLYVMS--LPLLVIYNYGSRDYWPF |            | 113 |
| P2Y6-Tetraodon  | 70 | VILKIWRTRPNLSRNNIYMLNLAIAADFLYVTS--LPLLIYNYGSRDYWPF |            | 117 |
| P2Y6-Medaka     | 54 | VILKIWRTRPNLSRSNIYMLNLAIAADFLYVMS--LPLLIYNYASHDYWPF |            | 101 |
| P2Y6-Sickleback | 97 | VILKIWRTRPKLSKSNVYMLNLAIAADFLYVMS--LPLLIYNYGSHDHWPF |            | 144 |
| P2Y6-Danio      | 45 | IILRVWGSRRALTRTKIYMLNLAIVADFLYVCS--LPLLIYNYASKDYWPF |            | 92  |

|                 |     |                                                      |            |     |
|-----------------|-----|------------------------------------------------------|------------|-----|
|                 |     | 120c                                                 |            |     |
|                 |     |                                                      | <b>TM3</b> | ### |
| MC5R-Human      | 107 | ADAFVRHIDNVFDSMICISVVASMCSSLATAVDRYVITIFYALRYHHIMTA  |            | 156 |
| P2Y6-Human      | 102 | STVLCKLVRFQFYTNLYCSILFLTC----ISVHRC LGVLRPLRSL--RWGR |            | 146 |
| P2Y6-Takifugu   | 114 | GEFTCKLVRFQFYSNLHGSILFLTC----ISVQRYVGVCHPLAMWHKKG    |            | 159 |
| P2Y6-Tetraodon  | 118 | GELTCKLVRFQFYSNLHGSILFLTC----ISVQRYVGI CHPLAMWHKRG   |            | 163 |
| P2Y6-Medaka     | 102 | GEFTCKLVRFQFYSNLHGSILFLTC----ISMQRYMGI CHPLAVWHKOG   |            | 147 |
| P2Y6-Sickleback | 145 | GEFTCKLVRFQFYSNLHGSILFLTC----ISVQRYVGI CHPMAMWPROG   |            | 190 |
| P2Y6-Danio      | 93  | GDFTCRLVRFQFYSNLHGSIFFLTC----ISFQRYMGI CHPLSLWPKOG   |            | 138 |

|                 |     |                                                     |            |     |
|-----------------|-----|-----------------------------------------------------|------------|-----|
|                 |     |                                                     | <b>TM4</b> |     |
| MC5R-Human      | 157 | RRSG-ATIAGIWAFC TGGGIVF ILYSES-----TYV              |            | 186 |
| P2Y6-Human      | 147 | ARYARRVAGAVVWLVLACQAPVLYFVTTTSARGGRVTCHDTSAPELFSRFV |            | 196 |
| P2Y6-Takifugu   | 160 | RKMWRVCGGVWLLVIALCAPTFHF AATGVQRNRTVCYDLSTPAHSVDYY  |            | 209 |
| P2Y6-Tetraodon  | 164 | RKMWRVCGAVWLLVIALCAPTFHF AETGIQRNRTVCYDLSTPARSVDYY  |            | 213 |
| P2Y6-Medaka     | 148 | RKKVWLCGGVWLLVITLCAPTFYFAS TGTQRNRTVCYDLSTPORSGDYY  |            | 197 |
| P2Y6-Sickleback | 191 | IRLAWCICGGVWLVVVL CAPTFHF AATGTQRNRTVCYDLSTPKSSLDYY |            | 240 |
| P2Y6-Danio      | 139 | RRLAWWVCAGVWVAVALCAPTFEF AATGTQRNRTVCYDLSEPSRSTSYF  |            | 188 |

|                 |     |                                                      |            |     |
|-----------------|-----|------------------------------------------------------|------------|-----|
|                 |     |                                                      | <b>TM5</b> |     |
| MC5R-Human      | 187 | ILCLISMFFAMFLLVSLYTHMFLLRTHVKRIAALPGASSARORTSMQG     |            | 236 |
| P2Y6-Human      | 197 | AVSSVMLGLLFAVPFAVILVCYVLMARR--LLKPAY--GTS GGLPRAKRKS |            | 243 |
| P2Y6-Takifugu   | 210 | PYGMALTCGLFLLPFLGIMVCYCRMAOI--LCRPVSYQGVSMATKEKRKA   |            | 258 |
| P2Y6-Tetraodon  | 214 | PYGMALTCGLFLLPFLGIMVCYCRMAOI--LCRPVSYRGVSMATGEKRDKA  |            | 262 |
| P2Y6-Medaka     | 198 | PYGLALTLGLFLLPFLGIMVCYCOMARI--LCRPVSHQGVPMATGEKRDR   |            | 246 |
| P2Y6-Sickleback | 241 | PYGMALTCGLFLLPFLGIMVCYCRMACI--LCRPVTYRGVSMATGEKRDOA  |            | 289 |
| P2Y6-Danio      | 189 | PYGIALTFLGFVVPFLVIIVLYCKMARV--LWQVGEAREVSAA--EKKNKA  |            | 235 |

TM6

|                 |     |                                                      |     |
|-----------------|-----|------------------------------------------------------|-----|
| MC5R-Human      | 237 | AVTVTMLLGVFTVCWAPFFLHLTLMLSCPO--NLYCSR---FMSHFNMYL   | 281 |
| P2Y6-Human      | 244 | VRTIAVVLAVFALCFLPFHVTRTLYSFRSL-DLSCHTLNAINMAYKVTR    | 292 |
| P2Y6-Takifugu   | 259 | VRMIIVVAVTFVCISFLPFHLTKTVYLVVRSFPGTPCETKNLFSVIYKSTR  | 308 |
| P2Y6-Tetraodon  | 263 | VKMIIVVAAVFCISFLPFHLTKTVYLVVRSIQGMPCTRNLFSDVIYKSTR   | 312 |
| P2Y6-Medaka     | 247 | VRMIIVVASVFCVSVFLPFHLTKTVYLVVRTLPHASCETRNLFSDVIYKSTR | 296 |
| P2Y6-Sickleback | 290 | VRMIIVVAVTFVCISFLPFHLTKTVYLVVRTLPGAPCETRNLFSDVIYKSTR | 339 |
| P2Y6-Danio      | 236 | VRMIIVVAVTFVCISFLPFHVTKTVYLVVRSVPTAPCELNLFSDVIYKSTR  | 285 |

TM7

|                 |     |                                                   |     |
|-----------------|-----|---------------------------------------------------|-----|
| MC5R-Human      | 282 | ILIMCNSVMDPLIYAFRSOE-----MRKTF                    | 306 |
| P2Y6-Human      | 293 | PLASANSCLDPVLYFLAGORLVRFARDAKPPTGSPATPARRRLGLRRSD | 342 |
| P2Y6-Takifugu   | 309 | PFASMNSFLDPILFYFTQPR-----YRQST                    | 333 |
| P2Y6-Tetraodon  | 313 | PFASMNSFLDPILFYFTQPR-----YRQST                    | 337 |
| P2Y6-Medaka     | 297 | PFASMNSFLDPILFYFTQPR-----YRRST                    | 321 |
| P2Y6-Sickleback | 340 | PFASMNSFLDPILFYFTQPR-----YR---                    | 361 |
| P2Y6-Danio      | 286 | PFASMNSVLDPILFYFTQPO-----YRRST                    | 310 |

|                 |     |                                      |     |
|-----------------|-----|--------------------------------------|-----|
| MC5R-Human      | 307 | KEIICCRGFRIACSFPRD-----              | 325 |
| P2Y6-Human      | 343 | RTDMORIEDVLGSSSEDSRRTESTPAGSENTKDIRL | 377 |
| P2Y6-Takifugu   | 334 | KRFVLRVTTLKG-----                    | 345 |
| P2Y6-Tetraodon  | 338 | RRFVLRV-----                         | 344 |
| P2Y6-Medaka     | 322 | RRLLLRVTARGDKAPPTLKKHSTSASLYCRYEL--  | 354 |
| P2Y6-Sickleback | -   | -----                                | -   |
| P2Y6-Danio      | 311 | KSLLLKITSLKDKTVKV-----               | 327 |
