# Supplementary material for: Spliceosomal Intron Insertions in Genome Compacted Ray-Finned Fishes as Evident from Phylogeny of MC Receptors, Also Supported by a Few Other GPCRs
Source: PubMed Central journal article supplement (PMC3151243; doi:10.1371/journal.pone.0022046), 2011-08-05
Supplement: pone.0022046.s010.pdf [file pone.0022046.s010.pdf]

**Figure S10.**

|                   |   |                                                     |    |
|-------------------|---|-----------------------------------------------------|----|
| CHRM3-Human       | 1 | MTLHNNSTTSPLFPNIISSSWIHSP--SDAGLPPGTVTHFGSYNVSRA--- | 45 |
| CHRM3-Takifugu    | 1 | -----MQEANLSYSS                                     | 10 |
| CHRM3-Tetraodon   | 1 | -----GDWTHHNVSHVLRSEGNMT-QS                         | 21 |
| CHRM3-Medaka      | 1 | -----FTDFQ                                          | 5  |
| CHRM3-Stickleback | 1 | MNLTSSSDSIHFLTNRSSVFMDSPLSVGGWKQHNVTHISRQGNFTDSP    | 50 |
| CHRM3-Danio       | 1 | SALCTEYATMNLTLSAEPLFLTN--SSPGMRANPVTAFMSHDLHPANDS   | 48 |
| CHRM3-Eshark      | - | -----                                               | -  |

|                   |    |                                                       |     |
|-------------------|----|-------------------------------------------------------|-----|
|                   |    | <b>67a</b>                                            |     |
|                   |    | -----  <b>TM1</b>  -----                              |     |
| CHRM3-Human       | 46 | AGNFSSPDGTTD DPLGGHTVWQVVFIAFLTGI LALVTTIIGNILVIVSFKV | 95  |
| CHRM3-Takifugu    | 11 | ANGTWLPPSDSFDPLGGHTVWQV IIIIVFLTGSLSLITVVGNILVLLSFKV  | 60  |
| CHRM3-Tetraodon   | 22 | LNGTWLPPADSFDPLGGHTVLOV IIIIFLTGSLSLVTVVG NILVLLSFKV  | 71  |
| CHRM3-Medaka      | 6  | AGRMSVLPTEKTNGSGGDPLWQV IIIIVFLTGSLSVITVVG NILVLSFKI  | 55  |
| CHRM3-Stickleback | 51 | VNGTLILPAEDFDPLGGHTVLOV IIIIVFLTGSLSLVTVVG NILVLSFKI  | 100 |
| CHRM3-Danio       | 49 | LHNTIQTPSVLSDPLGGHSLQVVMIALLCGISL LTIIGNITLVLLSFKL    | 98  |
| CHRM3-Eshark      | 1  | -----GPSLLKVILLIATITAI VSLVTIIGNILVIVSFKV             | 34  |

|                   |     |                                                     |     |
|-------------------|-----|-----------------------------------------------------|-----|
|                   |     | <b>TM2</b>                                          |     |
| CHRM3-Human       | 96  | NKOLKTVNNYFLLSLACADLIIGVISMNLF TTYIIMNRWALGNLACDLWL | 145 |
| CHRM3-Takifugu    | 61  | NKALKTVNNYLLSLAFADLTIGTLSMNLY TTYIIMDQWALGPVVC DLWL | 110 |
| CHRM3-Tetraodon   | 72  | NKALKTVNNYLLSLAFADLTIGTLSMNLY TTYIIMDQWALGPVVC DLWL | 121 |
| CHRM3-Medaka      | 56  | NKTLKTVNNYLLSLAFADLIIGTLSMNLY TTYIIMGHWALGPVLC DLWL | 105 |
| CHRM3-Stickleback | 101 | NKALKTVNNYLLSLAFADLTIGTLSMNLY TTYIIMDQWALGPVVC DLWL | 150 |
| CHRM3-Danio       | 99  | NKOLKTVNNYLLSLAFADLIIGVLSMNLY TTYIIMDQWALGNFACDLWL  | 148 |
| CHRM3-Eshark      | 35  | NSOLKTVNNYLLSLACADLIIGVFSMNLY TSYILVGHWSLGLTACDLWL  | 84  |

|                   |     |                                                      |     |
|-------------------|-----|------------------------------------------------------|-----|
|                   |     | <b>166c</b>                                          |     |
|                   |     | -----  <b>TM3</b>  -----                             |     |
| CHRM3-Human       | 146 | AIDYVASNASVMNLLVIS-FDRYFSITRPLTYRAKRTTKRAGVMIGLAWV   | 194 |
| CHRM3-Takifugu    | 111 | AIDYVASNASVMNLLVIS-FDRYFSVTRPLTYRAKRTTKRAMTMI CLAWS  | 159 |
| CHRM3-Tetraodon   | 122 | AIDYVASNISVMNLLVISVLFDRYFSVTRPLTYRAKRTTKRAMTMI CLAWS | 171 |
| CHRM3-Medaka      | 106 | AIDYVASNASVMNLLIIS-FDRYFSVTRPLTYRAKRTTKRTMAMIGLAWS   | 154 |
| CHRM3-Stickleback | 151 | AIDYVASNASVMNLLVIS-FDRYFSVTRPLTYRAKRTTKRAMTMI GLAWS  | 199 |
| CHRM3-Danio       | 149 | AIDYVASNASVMNLLVIS-FDRYFSVTRPLTYRAKRTTKRAMTMI GLAWS  | 197 |
| CHRM3-Eshark      | 85  | ALDYVASNASVMNLLAIS-FDRYFSITRPLTYRAKRTPKRAAIMIGLAWM   | 133 |

|                   |     |                                                       |            |     |
|-------------------|-----|-------------------------------------------------------|------------|-----|
|                   |     | <b>TM4</b>                                            | <b>TM5</b> |     |
| CHRM3-Human       | 195 | ISFVLWAPAILFWQYFVVGKRTVP PGEFCFIQFLSEPTITFGTAIAAFYMPV |            | 244 |
| CHRM3-Takifugu    | 160 | ISFILWAPAILFWQYIVGERTVQPN ECYIQFLSEPIITFTCTAIAAFYLPV  |            | 209 |
| CHRM3-Tetraodon   | 172 | ISFILWAPAILFWQYIVGERTVQPN ECYIQFLSEPIITFTCTAIAAFYLPV  |            | 221 |
| CHRM3-Medaka      | 155 | ISFVLWAPAILFWQYVVGERTVPP EECYIQFLTEPVTTFCTAIAAFYLPV   |            | 204 |
| CHRM3-Stickleback | 200 | ISFILWAPAILFWQYIVGERTVQPN ECYIQFLSEPIITFTSTAVAAFYLPV  |            | 249 |
| CHRM3-Danio       | 198 | ISFILWAPAILFWQYFVVGERTV EPDKCYIQFISEPITTFCTAIAAFYLPV  |            | 247 |
| CHRM3-Eshark      | 134 | ISFILWAPAILCWOYLVGERTV PSSDCIQIQFLSEPIITFTGTAIAAFYIPV |            | 183 |

|                   |     |                                                        |     |
|-------------------|-----|--------------------------------------------------------|-----|
|                   |     | <b>282c</b>                                            |     |
| CHRM3-Human       | 245 | TIMTILYWR IYKETEKRTEKELAGLQASGTEAETENFVHP-TGS-----     | 286 |
| CHRM3-Takifugu    | 210 | TIMAILFWKIYOETEKRAKEVQGLK GSGAGHGPTQPKNQGGGAASGREG--   | 257 |
| CHRM3-Tetraodon   | 222 | TIMAILFWKIYOETEKRAKEVQGLK GSGTGNGPTQPKKQQRSS-----      | 264 |
| CHRM3-Medaka      | 205 | TVMAFLFWKIYOETEKRAKDIQSLK GS-----                      | 231 |
| CHRM3-Stickleback | 250 | TIMSFLFWKIYOETEKRVKDMOGLK ASGSGDSQSQSQKQSGSKGRASGEI    | 299 |
| CHRM3-Danio       | 248 | TIMTVLYWR IYKETEENRSREL AGLKASGNVEEESV VVVVPPQTGS----- | 290 |
| CHRM3-Eshark      | 184 | SVMTILYCR IYKETERRTKDLAE LQGSNLGSENEIASASKKTL-----     | 226 |

|                   |     |                                                     |     |
|-------------------|-----|-----------------------------------------------------|-----|
| CHRM3-Human       | 287 | -----SRSCSSYELOQSMKRSNRRKY---G---RCH                | 312 |
| CHRM3-Takifugu    | 258 | ANNSQKDTSSVQCQGSOTCSSHDINQPAAEKSNSKSNEANAER-----KHG | 302 |
| CHRM3-Tetraodon   | 265 | -----SOTCSSYDLDPASEKKSNEA-NAEG-----KHG              | 293 |
| CHRM3-Medaka      | 232 | -----CASTNLNQTVMSESE-----GVG                        | 249 |
| CHRM3-Stickleback | 300 | ATNSQKDSSAIS---SOSCSSELNQLASDKNSKKNAGIPGGTGSKARCG   | 346 |
| CHRM3-Danio       | 291 | -----SRSHSSYELOQPAAPMRKTKT-----RRL                  | 313 |
| CHRM3-Eshark      | 227 | -----FRSCFGCE---GHKRSNRE-----RCQ                    | 245 |

|                   |     |                                                    |     |
|-------------------|-----|----------------------------------------------------|-----|
| CHRM3-Human       | 313 | -FWFTTKSWKPSSEQMDQDHSSSDSWNNNDAAASLENSASS-----DEE  | 355 |
| CHRM3-Takifugu    | 303 | TFWQRISF-----MFLSHRSKAKRSANNVTSGCEAEQSSYD-----SSN  | 340 |
| CHRM3-Tetraodon   | 294 | AFWLRISL-----LCFSHRSGKRPGNVAAACDRRKVAVTILLKSALQ    | 336 |
| CHRM3-Medaka      | 250 | EGSIKSNQRNTSVKHLHVRTSSSRKLC HQDGPARDPRGSDF-----DSA | 293 |
| CHRM3-Stickleback | 347 | ASCFQFSL-----LLSDRNASKRSVNSTTTIVGETEQS-----SCD     | 382 |
| CHRM3-Danio       | 314 | WFWSRGDV-----ERSSDSWNNNETAISIDQ-----SDD            | 343 |
| CHRM3-Eshark      | 246 | VSWSSSRSTTVTLRTHAQSVVDEWSKSDKAGSFASYPS-----SDD     | 288 |

|                   |     |                                                      |  |             |     |
|-------------------|-----|------------------------------------------------------|--|-------------|-----|
|                   |     | <b>361b</b>                                          |  | <b>383b</b> |     |
| CHRM3-Human       | 356 | DIGSETRAIYSIVLKLKLP-----GHSTILNSTKLPSSDNLQVPEEELGMVD |  |             | 400 |
| CHRM3-Takifugu    | 341 | NVEVCATGDHS---GSE-----EELNGESPSTFYIHMNAAV-----FY     |  |             | 375 |
| CHRM3-Tetraodon   | 337 | EISQVQRNWLVRVH-----QQVRHYHLPTLFVCI IYKNNTCLLSALY     |  |             | 379 |
| CHRM3-Medaka      | 294 | SQSPTVCLFEFE-----                                    |  |             | 304 |
| CHRM3-Stickleback | 383 | SLNNNQAGEQS---GSE-----DESDGADPTKAPT-----             |  |             | 409 |
| CHRM3-Danio       | 344 | DEEEDAHEIYTI-----                                    |  |             | 355 |
| CHRM3-Eshark      | 289 | E EKPTTKSVFSVSFKTQANNQKEEFNSEEDKKISLEDHPMINDYENSNCL  |  |             | 338 |

|                   |     |                                                       |  |  |     |
|-------------------|-----|-------------------------------------------------------|--|--|-----|
|                   |     | <b>402b</b>                                           |  |  |     |
| CHRM3-Human       | 401 | LE-RKADKLAQAKSVDDGGSF PKSF SKLPIQLES AVDTAKTSDVNSSVGK |  |  | 449 |
| CHRM3-Takifugu    | 376 | LDDKCKRMKKNKDRKRSSRSRQO-----DSQTNHQGSPESTVSTA         |  |  | 416 |
| CHRM3-Tetraodon   | 380 | LDDKCYRKMKNKDRQSSSRQO-----GLQSNHQGSAENAASAA           |  |  | 420 |
| CHRM3-Medaka      | 305 | ---KSVEEENKDLEQTSITIKRQ-----HGSP LFKASSS              |  |  | 335 |
| CHRM3-Stickleback | 410 | -DAKKSGRVKNKDKHSSNKSGKG-----SQSNPVNSSTA               |  |  | 443 |
| CHRM3-Danio       | 356 | ---EKQDLEAKPSKFGV-----SKSSTL                          |  |  | 375 |
| CHRM3-Eshark      | 339 | VSPAKCQKQDKKCVSYKFNKLT I-----TNSSFQPTTPDSSNGCT        |  |  | 378 |

|                   |     |                                                     |  |  |     |
|-------------------|-----|-----------------------------------------------------|--|--|-----|
|                   |     | <b>470c</b>                                         |  |  |     |
| CHRM3-Human       | 450 | STATLPLSFKE--ATLAKRFALKTRSOITKRRMSLVK EKKA AOTLSAIL |  |  | 497 |
| CHRM3-Takifugu    | 417 | TDRSGGITL-----KAKVEINKRKNEKKANDKKAARTLSAIL          |  |  | 453 |
| CHRM3-Tetraodon   | 421 | ADRSGGITMKD--AAMAKRFASKAKVEINKRKNEKKANDKKAARTLSAIL  |  |  | 468 |
| CHRM3-Medaka      | 336 | NLPGLTMTIKD--AALAKRFALRAKPEINKHKNEKKANEKKAARTLSAIL  |  |  | 383 |
| CHRM3-Stickleback | 444 | DQSTAAITIKD--ATMAKRFASKAKTEVNKRKNEKKANEKKAARTLSAIL  |  |  | 491 |
| CHRM3-Danio       | 376 | DSKDQPV-----KSARKTNKRKLSLVKEKKA AOTLSAIL            |  |  | 410 |
| CHRM3-Eshark      | 379 | QIKITPCSSSTDSEAPFIKNLDQNLKNQITKRRMVLVKERKAAOTLSAIL  |  |  | 428 |

|                   |     |                                                      |  |            |     |
|-------------------|-----|------------------------------------------------------|--|------------|-----|
|                   |     | <b>TM6</b>                                           |  | <b>TM7</b> |     |
| CHRM3-Human       | 498 | LAFITTWLPYNIMVLVNTFCDS CIPKTFWNLGYWLCYINSTVNPVCYALC  |  |            | 547 |
| CHRM3-Takifugu    | 454 | FAFITTWLPYNIMVLVNTFCDCIPQTLWALGYWLCYVNSTVNPVCYALC    |  |            | 503 |
| CHRM3-Tetraodon   | 469 | FAFITTWLPYNIMVLVNTFCDCIPETLWALGYWLCYVNSTVNPVCYALC    |  |            | 518 |
| CHRM3-Medaka      | 384 | LAFMTTWLPYNIMVLINTFCQNCIPEALWALGYWLCYVNSTVNPVCYALC   |  |            | 433 |
| CHRM3-Stickleback | 492 | FVFITTWLPYNIMVLVNTFCDCIPETLWALGYWLCYVNSTINPICYALC    |  |            | 541 |
| CHRM3-Danio       | 411 | LAFITTWLPYNIMVLLNAFCDCGCIPE TLWALGYWLCYVNSTVNPVCYALC |  |            | 460 |
| CHRM3-Eshark      | 429 | LAFITTWLPYNIMVLVNTFCSNCPVSLWHLGYWLCYVNSTVNPVCYALC    |  |            | 478 |

|                   |     |                                             |     |
|-------------------|-----|---------------------------------------------|-----|
| CHRM3-Human       | 548 | NKTFRTTFKMLLLCQCDKRRKQOYQORQSVIFHKRAPEQAL   | 590 |
| CHRM3-Takifugu    | 504 | NKTFRTTFRDILMCOWNQKK-NKPKFOERKN--FPPK-----  | 537 |
| CHRM3-Tetraodon   | 519 | NKTFRTTFRDILMCOWNQKK-NKPKFOERLTVSFHKRAGEIPK | 560 |
| CHRM3-Medaka      | 434 | NKTFRTTFRAILMCOWNGRK--KPHPHORQA--FOTKNVRKAR | 472 |
| CHRM3-Stickleback | 542 | NKTFRTTFRDILMCOWNQKK-NQPNFPQKAVAFKKKDPI---  | 580 |
| CHRM3-Danio       | 461 | NKTFRTTFRSILLCQWRKKLNKAQIQKRAPAATYRKHTQSL-  | 502 |
| CHRM3-Eshark      | 479 | NKTFRTTFKMLLLCQWKNKR-NEEKLN-----WYSQHP----  | 510 |
