# Supplementary material for: Spliceosomal Intron Insertions in Genome Compacted Ray-Finned Fishes as Evident from Phylogeny of MC Receptors, Also Supported by a Few Other GPCRs
Source: PubMed Central journal article supplement (PMC3151243; doi:10.1371/journal.pone.0022046), 2011-08-05
Supplement: pone.0022046.s016.pdf [file pone.0022046.s016.pdf]

**Supplementary file S1: Sequences of novel introns inserted into MC receptors of selected ray-finned fishes.** Only introns mapping to core MC receptor domain (TM1-TM7) are considered. The numbering of intron positions refers to the full length amino acid numbering of human MC5 receptor.

### 1. Introns of MC5 receptors mapping to position 41a

#### >MC5R-Takifugu-41a

**GT**TACAGATAGTAATTACATTCTCTATGTACTTGAGTATCTGTAGCATGTTTATCAATCAT  
CAGTTTTCTTACTTCCTGTCTCCTGGTGCTCCTCTATC**AG**

#### >MC5R-Tetraodon-41a

**GT**AAGGAAACGATGTTTGATTGCGCCTCACCCGTCGGCCTTTGGTAACTCTCTGTCTC  
CTCGGCTGCTTCTGTTTCCTGCC**AG**

#### >MC5R-Sickleback-41a

**GT**ATTAACACACACGGTGCTGAACGTGGAAATGTTTTGTTTTGTTAAAGGTGAAACACT  
CATAACGATTACCATGAAAATTGAAATATGAAAACATGAAATGCAACTATTTTTGTATCA  
GGATTTTCTAAACTTTGTTGAAATTACAGATGGGGTATTCTGTTATGTTGTATGTGCTAA  
TTTACATACTTTTACAGAATCAAATCTGAACATATGAATAAAGACATTGTTTTCTTTTT  
TTACTTTAGTCAAAGGTTAGAAAAGAAGATATGTTGGATATATTTTTGATTCACTCAATG  
AATAAGAAAATATTGTCAACAGGCATAAAAAATAATAAACTTTATGATAAATTTGTCCAT  
GTTTTTCAAATAAAATGGTATAAATCGGGCTATGAATAATTTATGAGGATATGGAGATTT  
CTGGCAATAATTGAGAGAAAACAGCCTCACCTTGTGTTTAAGCCATGTGTGTCTTTTTGTC  
TCATTGTCGGTTTGTCTGTTATTTTTCGTGTTTTCTTTGTTCCCCAGGGAGAAGTCTTC  
TTGTATTTCTTGTCTTTTTTTTTTACCTGTGACCCTCTGTTCCGTTGAGTTAACCATCGCG  
CCGTCCCTCAGAGTTAGTTTGGGGGAAACCTGCTCCATTTCCGGCCACCCTGCCAATCTT  
TGTATCTTCACTCCTCCAATTCTTCTCTCACACAGTGTCTGCTCTCCTC**AG**

#### >MC5R-Medaka-41a

**GT**CTGTACCGAGGCGTGTAAAGCTTGTTCCTGGCATTTCAGGTATCTTTGGAAAAACGTCA  
ACCAGTGATGGGACTTTGAGTCAGGTCTCATTACAGTGATGCAACGCGTACCATCAAGCA  
TGACACTTGTGTACATCTTTATTAGTTTCGCTGTCTTTGTAGCAAATGTAGCTAAGCAGA  
GATGGATTTGTTCTTTCAGAAAGTTTGCATGAAACACTCTCGGGACTTGACTTGAACCAT  
GAACATCTTTGATTTGTATTTTGTCTGGATTACACCCGGACGCAATTTGCGCATCAAATC  
GCGTCTGCCGCTCTCATTTGATGTAAATGTCAAATGTACTGATCAAGCCTTGACGCCCC  
AGCCCCGAGCAACCGCCAACGTTTTTCTGGACTTCACTTGTGTCACCTCGAGGAAAAC  
ATGGAGGATGTTGAGCAAGTAGCTTGGGGTCATATGTTTTGGAGAGCTCTACTGAGGCAC  
CGTCAAGCACGCCGCTGAGTCTGGGTTACCAGATCCTTCAAAGTGCTAACACACCAGCT  
GGGTCGACTTGCATTTAAGTGGCCACTTTGAAAGAAAAGTCTATGCAAACGCATGCAGAC  
CAGAATTTCTGGCTGTTGCGTCTGAAACGCACGTGATCGCGAGCTCTACGTACCAATTC  
ACCGGTTGAACTTTTTTACGCAGCAACGCAGAGATTTGAACAATCAGGGACTCGCATTT  
TTAGTGACATGTTAGTAAAGTCCAGACGTGTCATCTGTTGTAAACATGATCACAAAGGAG  
ATAATAATCGCGTTTTGTGCCAGCTGGATTAATATGACACAAAGATGGATATTTAAAGG  
AACAGAGCTGGGAAAACAAAAGCCTGGAGGAAAGTTTGCAGGACTTGCCTGCTTTGAC

TTTGCGCACTGAGAGTCAACCTATTGTATGTGTGTCGGACGAACGCTAGTAAACAGTAAAA  
CACAAAAGAAAAAGAATCCCCCCTCCCTCAGGCTACCTGCGTGTCTGGCGGTGGTCCGG  
TGTGAACACCACCGGTGAATGTGAGTTCATGAATCATGCAGCACGTTCTTGAATGCACC  
ACACACGGCCAGTCTGTATGCGCCTTCAGAGACTCTCCGGTGCACCTCCGGTTGACAGG  
CCGCTGCCGTCTGGATGGACCCTGGGTGGCGGGCCCTTCAAGGATGTATCCCGCCTGC  
TCCCAACAGTAATCGGGACAGTCTCCAGCAACCCCGCGGCCCCAGCGGGTTAAGAAAATG  
GATGGAAGTTCAGGACGAAAAATCCTCGCATCGAGCACCTTATTGAATTAATTTTATTCT  
CATTTGATCTAGCTGTGAAAATGTATGTGCGGAGTCCCTAATTGGTTGACACTCGTGTG  
CTGCGCCTGAGACCATCGACCGAGACTCTACATTAACCTTAACTTAAACTCGATGCCCC  
TGAAGTGCAAATTGCGTCCAATGTGGACATACTTTTGCTTATTCATCCATTGTTGTTG  
ATTGGTGCCTGCTTTTCTCCTCTGCAG

## 2. Introns of MC5 receptors mapping to position 77c

### >MC5R-Takifugu-77c

**GT**GAAACGTCTCATTA AAAACTTCTCAAATTGGTTGACAGCATTTATTTGCTGTCCCTCCTT  
TTCCCCACAAATAAGAATCTTTTTTTTTTTTAAATTCTTGTGAACTTTTTCACCCAGCA  
ATTATATAATAACACAGCTGTAGAGATTTGCGGGTTTTATGTTTCATGTAATTGTGATTTT  
TTTCTGGCAGCCTCGGCCTTGTGACTCTCAACAGGGAAAGTCAAACAAAGTAGACAGAAA  
AATCGAATTA AAAACCATTTTGGCAGCTTAATGTTGGCGTTAATGTCAGACAGTTGTGAC  
TGAGTTGCCTGTGGGCCTCATGACTGGACGTGTTTTAAATTGTCGTGTACGTGGTGCCT  
TCAGGGACAGAGGGGACTTTGATTTTCAGGGTATTTGATGGGTTCTTTGCTAAAAA  
AAAGGGTGGACAGTGAACAATCTTAGAGATCGAGGAAACATATTTTGTCAATAACATG  
ATGGGGCATGAGCAGCGGAATAGCGAGCATAGGCAGCTAGCGAAGCACACCAGAAAGAA  
CCTGTAATCAAAAAGGCTGAGCTCTGATCCAGGAAGAGACACCGGTTAAAATAAGGTGAC  
AACACAGGAAGCTGGAGGACACGAACAATGACAGATCTAAAAGGAAGCTTGCTGGTTTGC  
TCGTTGC**AG**

### >MC5R-Tetraodon-77c

**GT**GAAATCTTTGAACATCTATGTAGAAACAACATAAAGGGACTCATCTAAAAAACTTCAT  
GGAGCTTTTGTCTGTTGTCCTCCTTCTCCTCCTTCTTTCCAAATATGCATCTAATTTTC  
TTAATGCACGTGAACTTTTGCACCCAAGGGTTGCGTAATAGCAGAGACGTATCAATTTGT  
CCGTTTTTTGTTTCATGTAATTGTGATTTGACTGGCAGATGCGACCTTGTGACTCGGCAA  
CAAAGCAGAAAAGAGAAAAATGGAATTA AAAACCAGTTTCATGTTGGCGATGGCTGCAGAC  
TGTGTGTGTGTGTGTGTGTGTGTGTGTGTGTGTGTGTGTGTGTGTGTGTGTGTGTGTGT  
ATGTATTCTGTGTTTTACTGTAAGAAACCCAGTGTTGTCACAGGAAGCAGGCTGAACTGG  
GGCCTTTAGCAGTGGGAAGGTCTCGGATTCAATGTCCTTGCACATTAAGTTGAGCGGTTT  
CTGCTGCTCCATGTGACCCAGGTCGGGAACAGGCAGAAAACAGACGGACGGAGCATTGTG  
AGTGATCCAGAGAGCATATTATGTAAAGAGGCCTTTAGACTTATGACATTAGTGAATCCT  
TGTTTAACTTGATTTTAGTATTGATAAAGCTTAATTGAAGACAGCGGGTGCTTGATCTAG  
AGGATTTTAATGCAATAATAAAAAGTAATTTATTAAGGATCTGCTATTCAAATGATTGAAT  
TTACTAATTATTGTACCTATTTTTCCCTGAATTTTCTGTCACGGAATAATAGGTTGACTC  
AATTACAAATAGGGTGGAATAGCAGCACATGCAGCTAGCGTAGCATAACCAGAATAAAAAT  
AAAAAACATAAAAAGGTGTGGAGAAATGACCTCAGACCCAGACGAGACGCAGGTTAAT  
GCAAGGTGACAGGAGGACGCTGGAGCACAGGAACATTGGTCTAAAGTGAAGCTCTCTGCT  
TTGGTGCTTCC**AG**

### >MC5R-Sickleback-77c

**GT**TAAACTTATTGACTCAAAACAATTGAATAGTCAACTCTCCATGCTGAGTCTTAAAGAAA

CTGATTTCTCATGAATTCTCTCTGCCTCTTTGTTTCACTTAAAAATATAAATTTGTGTTG  
CCAGAGGAAAGACATTAATTTCTGAAACTGTCATTAATCCCAAATTGAAAGTGAAGGAAT  
ATAAGTACATGCCTCAGGCCTTTTTGAGACTTTTTGCATTCATGTACCCTGCTGAGCTCA  
TACAGACTTATTAATTAGTTTTATATAAGATTTTTGTAACCTTGCTGAAAAGTTCAATTT  
GAATATGAAATATTATCTACTGGTAGCTTCTTGTACATTATGAGTCAAATCTACAAATGA  
GCTGAGTGTCTACAAAGTGGACGCGGGGCTCTGTCTTGAAAATGTTTGGAAGAGTAAATA  
CCCTTTTCATTGGGAACGCATAAGACGCTGGTGCGAATTGTGACTTTATGTGGATGAGAG  
CCTTATGATGTAAAGCGTTAAATCCCCTACTCAAAACCAACGCAAAGAGACTCAGCTGAC  
ACGCCAGCTGCGGGTCTGGGACAAAGCAGACATTGAGTTCCTGTGGAGTTGGTCAACA  
TTAGATAATGCTTCCAATCATGTCGTTTTTAATGATTTCTCTGAGGCAACTAGATTGTA  
TCCCTGCAAAGAGTGACAGAGAATCATAAAAACGTGCTTTTTGCTGGCACCTCTGCCA  
CAGTGAGCCTCAAAGACAGAGCAGACATTAGGGACAACGAAGCTACAGACCAGCAGAGTA  
CGAGGACGACTCTCCACTCAACGGTTAGAAACAGGCCGCTGGGGGCAACGAGAAGCAAAG  
AAGAGCCAGGCTGAGGTTGAGATGCATTATTCACACAGAAGTTCGTGCCTTCACTACCGT  
AACTCTCTCCTGGCAGGTCTTCTGCTATCGTCATTTGACCTCTGCAGCTTATCCAGAGA  
CAAGGGATGTTTCTCAGTGTATTCTGCTGAATTGTAATTTTGTAGTGTAGAGGGGATA  
GATTAATGTCCATAAACCTTGTGCCGAATTGTAAGGTCAGTGGTTCTGCTGTGCAATGTA  
TTTGGGATTCAAGTGCAATTGATAACACAATTATGCAATTTCAGAAGTGCTTAAAAATGC  
ATTTCCATCTCATTCATGCATTTCAAGTTGTTGGTTTTTCGCTGGGACACAAATGTG  
TTGTCTTGACGGGGGGCAGGGACAGTGCATATGAATGTCTACGCATTCATGTGCACTGT  
CCTGAGCCTGACCAATCTCTTTTGGTTGTTCCAG

>MC5R-Medaka-77c

GTGAGCAAGTCATGTTGTGAGGGAAACATGAAACAGTTTTTACACTTTTGTATTTCAACAA  
TTCATTATATTGTTGAACCTGGTTTTAAATGTGCTTTGTAAGTTTGGTTAACGTCTTATT  
CTCAGTGTTTAAAACCTCAGTTTCATTCATTAATGTATAGATTAATTTCCCCCAAGCA  
TTATCCAGTGATTCCATAAACCTCTGTTATTGCTGTTTCAAACAGTACTTTTGGCCCTGC  
AGCCTAAAGGCTATTTTAAATTATACTTTATCAGATCACTCACTGTAGTTATTGCCACTGT  
GAACCAGTGTACCAGGTAGAATCAGTTTTTTCAGCCCAGATAACATCTAAAAGCCAACAG  
ACTCCCAAAAAAAAAACAAAAAAAAACATCCAAGACGTTAATCAGAAATTATCTAGCCTGAAA  
GCGTGGACAGTGTATGAATATTTGCATGCATAAAAACCCAATACATTTGCCAACTACAA  
ATTGTGTTTCATATCTTAAATCAGCATTCTTTTTACAAACAGAGCAGGTTCAATTTTGGGC  
CAGGAAGAATGTCTCCCAAAAACACAAACGTGAATGATACAGACAGACTATCAAATAGAC  
ACAGCAAAATACAAGCTCTCTCTGACACACATCGTCGTGTGTGCACACCCACAAAATTCA  
CACACTGGTTTTTACCTTTAGTTGTAACAAAGCACTTATGCCTCTTTTTCTGGACAAAAA  
TCTCAGCGACTTTAGCAAAAACGTATTCCTTATGTCCATTTTTTAAACATTTGCCTACTCT  
GAGCAAGTGAGGCAGGTCTTGGTGCTGCCTCACCTCGCAGCCTGTGCTTTAGTTGAACAG  
GACATTAGCAGAAAACAGTGATTTGGAGTATAAAAATGATCAGAATCACACACGTTGTTA  
CCCTTTTGGCATATCCCTTGTGGAACCAGCTTCTACTGATCCACACAGTTGGTTTGGCAG  
AGATTTCTACGCCAGATGCCCTTCTGACACAACCTGTATTTTATCTGGACTAGGGACT  
GGCTCATGGGACCCAGACTTGGGCCCCCTTGTGGCTACATAGTGAGGTAGTAGCGCGAA  
GGGTCTCAATTTTATTTTCCATTTTATGTTTTTACTTAGATGTTATTTATTTAATTTTCA  
CATCTTTCTGTAAGGCTTTAGGCAGACGTTTTAATATATATATTATACTCTAGGCTGGAA  
CTTTGGAGTTTGGAGAGGCCTCAGGACCTTTCTGACCGTGAACAGCAGTGGTGACACTAG  
TAGAAAGAGACCAATTAGTCCGGCTCAAAACTGCCACAAGACACAGTACAGGGTCTCTCA  
CTTGGATGTTGGTGGCTGCTCCTGCTTTGAAGTTTTGCGTAGAAGGGTTGACATGTGAGG  
TCGTCTTAACGAGAAGTGACATCCAGCTCCAACCTAGCGATGGGTCCGGCAACACCAAT  
GCGCAGGCTAACGTGTTGAGCTCAGAAAGTGAAACCCTGTGTCCGGTGCCTGTCTCACTTC

AGGAAAATTCACGATACAGCCACTGTGTTGGTGTGTACAGAGGGGCCAAACAGGGAAGT  
GCATCTGCCAGCAGTGTGCCAGATTCTGCGGTTTTCCACCCAGGTGGGTGGATTTGATT  
TTGACATTGCAGAGAAAATCTGCTTTGGGCAGGTTTCGCATCAATTTGGTGGGGTTAATT  
TAGTTTTATTTGAGTCTAAGCTATCTTTAAATTTGAAAAATATTTTCTTTTGAAAAATT  
ACTGGATCTTCTCGGTTACATTTCTGTCACTTGGGTGCTGAATTCTCGCACTGGCACTGG  
CGTGGGGGAAACCCCCGTTTTCCCCACCCATCTGTGTTAACGTTTTCTTTACTGAAT  
CTTTCTAAAGGTGTTAAATGTCGTGTTTTAATTAGGTTTGTGGAATTATTTGATAGTTT  
TAATAGTGTCTGGCTTTTTGTCCCCCATATATGCATAATATTAATCAATTTCAAAC  
TGACTCTTATTTGAAGTTAATCATTAAATTATTCTGGAGGTTAAATGAGGCATTTGTTTAG  
CAGAAGTGTCAACCTTAAAAGCACCTCCTTAATGCTGGGGCATTATAGAACGAGACATGG  
GAACGAAGAAGCAACAAATACAATGAGAAATATTGTGTTTACACTAGTTTATTTTCATCAG  
TACATCAGTAGAGTTTCTTCACTTGGTTACCTGCAATGATGTTTTCGGTCCAGCAGGAGT  
CAGTATTGAGTGACACAGTATCAAAACAGTTTGGGCAATGTGCCGAAACGCTTCACGAAG  
CTTCATCTACTCATCACTACTCCAATCCAGAAAGCTGTGTCCGAGTCCAGAGAAGGAGGG  
CCAATAAAAAAGACTAAACAGGGTACAGGTATTTTCATGTTTGTCTGTTGTTCAATTTACTG  
TTTGGATCTGACTTAAGCCACATTGAAAAGGCACAAGGTCAGGCAGGCAGTAGCTCTGTC  
TTAGTGTAGTGGGGGCTCTTGAACCTCATGTTTGTTCATCTGACAGCAAAAATAGCAGATG  
TAATATTATTTGAATATGTCTAAATATTGGACTTTCAACGAAAACCTAAAGTAAAAATTA  
AGGATGACTGTGCTGGACCAACACATCTCAACTGTTTCATCTCAAAGTTTCAGAAAATGA  
CGAAGTGGAGAAATGGATTCATGAATCAGGTTTGGAGGACACTTATGAACTCAAGGTTCA  
ATGAAGAATCAGTTGGAACAGTAATTGTGTGTCTGCATGCGTACTGGTCTTGTAGCAATT  
ATTTATCTTTAGGCTATTTTTCTTTTTTGGAGGAGGAAATTCTATTAACATCTCTAGTTC  
CACACCGAATAAAGATGACGATCCCTTGAGAAATTAATAAAAAACAAGTATTTGGATATAT  
TTTGTGCTTTTTACATACTGTAGTTTATTTGCTGTTTGTGTTACTTTTTGTCACTTAT  
CTGATGTTTTTTCTACCCTCGTTGCACAATGTTTCCTTAAAGCAACAAATATATATCTGG  
TCCAAACCTATCCGTTCTATCACACAATCAAATCCTGGAATGACCACATTCAGACTAGGG  
TGTAACCATGTCTCCACACATGCGATATTTTCAGAAAAATTTCTTATCTGCACACACTTT  
ATAAATTACAACCTTAAACCACATCCCTTCTCTCAGTCACTGATATCGACACCTTTTTTCC  
ACATATTCCTGTGATTTTCTTGGCCTTAGAAAAGTTTTTTCAGTATTTGAACAAAATAAAAC  
ACTGGGTAAATTTTCAAATAAATTGAACCACAACCAGTTTTTAACTTCTCACTACAGGT  
CTGACACTACCGTAAATTAATTTGTTAATATTGTCTGAGTAGATTTGCCTTTTTAAAT  
CTTTTTGATTTAGTTTCACAATCTTTTGTATTGAAATCTTGCCAATAAAAACAAAAATCT  
GCGAGGACAAGATGAAAAAGAGAGTTTATCTGGCTGTGACTCCCCATTTTGAGCAAGAGT  
CACATTAGGTGTAACCTCAGGAGCTGGAGGTGAAGGAGCCAAAATGCAGGAACCTGGGCTT  
GGAGGTAGAAACGTAAACATAAAAGAAAAACTTTAAACAGGACAAAACCTGTGGAGAAAC  
AGTGGATGACCTGACAATGTAGAATGAAAACACACACTTCGAGTCACTGAGGACAATG  
AACAGAAATGAAGACAGCTGTGGATGATTTGCATGAACATAGAGGGACTAACCGGGGACA  
GAACACCACTGAAAAACTGAACTAACTGCAGAATCCTAGAACATTATGATAACGTTACA  
TATAAAAGATTTACCATTCTGGGGATGAAAATTGTAGGAAATCTGTGTTTAAATATTA  
CCATTTGTATAAAACTTGATTCATGTTGATTATGCCTGAAGCACATGTACCAACATAAAT  
AGCTTCCAGTGTTTTATCGCTTTAATGTCTTCCAAGTCTATGATAAAATGAACAACTTA  
TGTTGACATTTGTTTATATAAAAAAAGACAATTGTTTCACTTTCACCTACACAGGACACA  
TTGCTGTGTAGTTATTTATTAGTGCTTATTTTTATACTTTACTTTTCATATTGTTTAAAC  
TCTTGTGCTATCTTAGATGACCCACCCTTACATGTTACATGTTCTTCCCTACCATGACAA  
AGGTGGATAAAGGTGGAAAGATTTCTGTAATCCATGGACACCAGTGAAGATCACAAATC  
ATTGAAGAAAAAAGGTTTCAGAGCACTGTCTAGTGGGTCTAGATGACCCAACCTCCAATGT  
TAAAGTGCCTAGGATAGCACAAGGGTTACAGGAAAAAAAAGTGCTTTTGCAGCCTTTTTC  
CGACTTCTGAAATCATTTGCACGCCCTGAGCATCAGGTTAGGAGAAACGGATAACAGAG  
AGCACACTGCTTTAGAAAATTGAGCACAACAGTCGCTTTCACATCAAAGAAGGGTTTGT

TGCTTTCTTGAACATCTTTTGCATTAAAAAACATTCATGAAGCTTTCTGGCTGTTGCAG

### 3. Introns of MC5 receptors mapping to position 140c

#### >MC5R-Takifugu-140c

**GT**AAGAACTTCCCGTTGGCCTCAGATGTAGACCTCTGATGTGGATTCCATTAAGTTTAA  
TTGAATCAACCTTTTAGTGAATGTCACGGACATCTTGTGTTGCTTTGCTCATAAATGTA  
AAAGGAATGCTTTGGTTACGCCAATTGCACAGAAACAGTAAATTTAATTACATTTTAAT  
GCTGCTTTATATAATTTACATTACTTGTGTCTTCAAATAGCTGGTTGTTTGTTCAGCCC  
AATAAAAGGAACAAAAAGTCCATTTTCCAGAATATTCTGGTTGAATAAGAGTCGCAACG  
TGGTATGAGCTGTAGTGTCTGATTAAGAGCACGAAGGAACAGATTCCCAGTTGATAGC  
GGTTTATTGACTCGTGGTCTAAGATGCCTCCCACAAATTAATCAGAGAAAATCAGTTATG  
AAATGAGTTCAGGAAAATCAACCTTAAATACTCATCACTCGATAGATCTAAATAGATCCA  
ACATTTAACGTGTCCAGTCAACATGATTCCGAGTAATTCTGTCAGAATAGTAACGAAACA  
TGAGATTTTCTCAGAACTATTAAGAAATTAAGAGCTATTAACAAATTAAGCGCCAACCTT  
AATGTCAAACCTCACCTTCTGTTATTCACACACACCAAAGCATTAAATGAATCCAGGGAAGA  
ACGAAGGGCTCCTCCCTCTGTAGACCCTGAACCTAAGCAAAAACAAAACCTGAACTAACT  
CATTTCCAGGTGCTGTGTATTAATTCCTCCGCACATCTGTGGTGGCTTCAAGACACACAT  
GCATGGAAAACAAATCCCAATTAACCTAAACACTATGCCACGTGGGCTTTGGAACATCCCACC  
TAAAATCAACGCATAAAACACGTTTCCACCATGTCAGCACGTTCCAGTTAATCCCAGTT  
CAAGGCCGCCTGCTGCTGATCCAGATCTGAAACAAGGATCCTGATCTTTGTCATGGCCCA  
AAATAACCCAATCCTTGGGTCGCTTCCAAACTCCTAACTCCAAAAATCTTGGGTTTGTGA  
TAAACGATCAACAAAAACAAGCGCAGGGTCTGGTTGATTCCAGCAGTTATATCGATTTGA  
GTAGACAAAGCGCAATCAAAGTTGTCTGGAGCCTGACCCCCGTCTTCCCGTCTGCAG

#### >MC5R-Tetraodon-140c

**GT**GAGAGCGCCGAAGCTCCTCAGTCTGAGCTGCTGATAAAAATGTCTGCTCGTTACCTTG  
AAAGTTCTTCTGGCTGCCGCGAGAGACTGACGCCATCCTACCGTCGGCAG

#### >MC5R-Sickleback-140c

**GT**AATGATGGAGGAAGGCGGCGTTGTATGAATAAATAAGCAGCATTGAGTCGTAACAGAG  
ACTAGGGTGTATCCAAAAACTTGGAGAGTTTGAGACCAAGTCAATATCAAGACCAGAGG  
TCTCAAATTGTGCGTACTGTATATTTACGTACGTAGTGTCCATGAGACAACAATCTTGC  
ATTTGATGCATGGGGATATTTATTTGGTGTGCAACAGCAAACACATGCAAATAAACTCA  
AAGGAGCTTAAATCAACTTAATCATCTTCATTCAACACTTCTTTTTGACTCTACCTCTAC  
AG

#### >MC5R-Medaka-140c

**GT**AAGAACGGGAACATTTAATGATTTGATTACATCTAAATGGCATCTAATATCGAGTCATTA  
CAGTTGTAACAGAAATCTCATTCAAACGGAAATGCAATCACCAGGGAGACAACCTGAGCTT  
TGTTAGAAATACAACCTTGATTAACGTTGTGGTTTTGAAAAATATTAAGGGCTTCAGGGGTCTCTAAT  
ATAGCTAATGTGTATGTGCAGGGGTGATGGCAAGCTTCTGAAATGGTGGAGAAAACGAGACAAACA  
AAGGAACAGCAGTAGGTCTGATAGACAGCAGCAGAACTAAACTAAATGTGGATCCAACGGAATACT  
CTTTCATCATATTGAGACAGAAATAAAGTTGCACACCGTTAAAATCCCTTTTTATGGAAGTTTATCTCC  
CATAGTTTAAACTATAAAAATTCAATGGTTAACGGTTTTTGCCTCACAGCAAGAATGCCCTGGCTCAA  
GTCTGCCTGGGGGACCTGAAACAGAACATCAATGGGGGACCTTCTGTGTACATGGATGGGTTTTCT

CCGGAGACTGCGACTTCCTCCCACTGTCCAAAAACGCTTCATTGGTTAGCTGGTTACTCTAAATTGTC  
CCTAAGAGTGGATGTGAGTATGTATGGGTGTCTGATTTGTGGCCCTGGGACAGACTGGCGACCTGTCC  
AGGATGTCCCATGCCTTCGCCCAAAGAGTCCGGGGATAGCCCCGGGATAGGCTCCAGCAGCCCTGTG  
ACCCCGAAAGGGAACAAACGGATTAAGATGAATGAATGAACGAATAATACTTCAATTTGCAATTT  
AATCATGCAAATTTAATGGCATTGTTGCAATTTATCATTATAAATTACATTCAATCTCAAATTTTTTAA  
TTAAAGCAAATCAATCACATTGTTGTGTTATTTCTTTAATTTACTGATTAACCCGCTTTTTCTTTCTTA  
AAAATTTAGATTGGAATATGTCAGTTTCTCATCAAGTGTTTACCCACTTGCCTGGATTTTGCAAGTTCT  
ACTCCCCTTTCTTTTGATAGACCATTTTAAAAATATAAAAAATACTCATCTAACAAATGTGATAATCG  
GACTGTTGGGAGTAGAGTAGAGAATGTACCACCCTATTAGATCGTATATTACCTACTAAGTTCATGTC  
TGCAACAGATTTTTGTTTCAGCCCTCAGAAGTTATTATTGGATCATTCTTTATGGGTATTATGTCCCTTA  
AAAGCTCCTGTAGGTATATGTTGTCACTTGTATGAATATGCATGGATTGGTCCATCTAGTTCTGTGCA  
TCAACAAGGGAGTATCACAATCGCAGTGAAGTCCTTAAACTGCCTCTTACCAGCCATCCAATGCGCA  
GTACAGATACAGTGAGGACTTTTTAAGACCAAATGTTTGGTGCATGGGCTGATCCAGTGGGACATAAC  
TGTAATTAGCAAGCCCAGCACACCAGGAGCAGCAGCTCTTGACAGCTTGCCTCCCAATTACCAGATGC  
AGCAAAGTACTGGCCACCCTGCCACACAGAGAAAAGAGTTTTCATGCAATGGGGGCTAAGAAAGG  
AGGCCACCAGTGTCTTTGAATAATCTGCACATAAGAAGCAACTCAGTGTTCGTTAGCCAGCCATAAAA  
AAGACAGCATCTGCCTTAAATCAAAACAGTCACTTTCAACACTGCAGAATGAAGCCGAGTTGGAAATA  
CAACTCAGTTAAGAAGAAAGTTAATGCTGGAACGGAATTTGACCTTTTCAACACATAGATCATTGGCA  
AAACCTCACAACCGTCATGTAGAGAACAAATACCACACCTCCCATTTAAAAAAGTAAAATGTCAGAT  
GAAGCAGCTGATAAAGCAGAAGATGGACCTTTCTGCTGGACCATGAACTGGTCATTGTTTTTTTCACT  
GAGATGCAGTTCGCCCTTTACTGAAGTTTCTTTTCATTTTTTACCAACAG

#### 4. Introns of MC2 receptors mapping to position 140c

##### >MC2R-Takifugu-140c

GTTCATGATAGTCTTATTTATTCATTTTTACACACGGGTGTTTTGCCGTGTTGTTTTGTGCAACTCTC  
AGAGGAGACACCATAAACCTCTTACCGGACGGATTTGTTTTCACTTTCAAG

##### >MC2R-Tetraodon-140c

GTATGTTTGCCAGCCTTGTTATTTCTACAGACAGGCATGCCGCCATGTTGGTTTGTGTAACCTCACAAG  
AACTTGTCGTTGTCCTTGTACACGGACGTATTTATTTTCCCGTTCAAG

##### >MC2R-Sickleback-140c

GTACGTTGGCAGTACAGACATGATTTAAATGAATATTTGGAGTGTTTTTAAGCTATTGCCGTGCCGTT  
AAAGGAAGGATTGGATTTAAATCTGATGGGGTGAATGTTTTCCCCTCTAGCAGAGTAATCCACCAGAG  
TCCCAGTATCAGACGAATCTCGAAGCTATTTGCTTCCATTTAAAAATAAATGGAATAAATGTGAAGGAG  
GCTGAACCAGGGTGGGTTTACTGAAGGCTTTAAAAGAAAGTTAAAGTATTTATTTGATCTGTTCACTGC  
TGAGTTGGCTGTTTTGAACTGTCTCTGGTATGTGGACCCTGTCACCAATTATTCTCTGCTCTTTAAATTC  
AAAGTCTCAACTACGACTCTGAAAATTTTTGAAACGTCTGAGCTTTTTTCTGGGCTCATAGATCCACAG  
CTCATTTAAAACCCACTGCTCTTCCCTATTACTGCTACGGTTACACTTTTTTACACCACGATTCAGCCCA  
GTTTCAGCATAGTATCACATCGTGAAGTTACATTTATTTAGATAAAAATTCTGCCAACTTACATTTGTA  
GCTCACATTACATTACATGTCATTTAGCTGACGCTTTTATCCAAAGTGCATTTACCAAATATGACATTG  
CTGTGATGCTCACAGTGATACGGTATTAGTTATGAATAAAAATTCAACAATTCTAAAAAATATGTTG  
TAGTAATTTAATTAATTTTTCTGTTTCTACAGTTATTATTGCTTACCAAACACAACAAGACACTTTTTG  
TTGTGGTATTTGTTAAAAATGTTTGTGGGTACATTGCTGTTCAATGGGACTAATGACCGGGGGGAA  
CGACGGCATCGCCGGGTTTCCCAAATAAAGAGTTACAATCGAGAGCAGTTTGTCTCTCACTGTATTCA  
AAAACATGACAGTAGTTGTTACAAATAACTTTGGTTCTGTCAACTCGCCGTGTTGGAATGTATTTCAAAT  
GAAAATGTCCACAAAAGAGTTTGCCACCTTTCTCCATTTCTCTGTTTCGGTTCATACAAGCAGTTTAAAT  
GCCGTCAAGGGTTTGGTACCTTTTGTACGACCTGCAGGCCTGGATGTGTAGCTCCATACAGCTGAGGG  
GAATTGCAGAGTCAGGTGATCTCCGTGGGTTTTATTCATTGATTACCTGAGCAAGTTCAAGTGAACCTG

AAATTTAAATTTATTATATATATTTTAACTATTGATTTCCATTTAATTATATTTTTGTAGTTTCTACCTGC  
CGCCCCATAGTTTATCATGAATTC AATCGAACACCGCTCAGTTATCCGTGTAGATGGAGACCCTATTTT  
GATACAGCAAATCAAATCTTGCATCACGTGTTAAATCAGAGCTTAGCTGGCTTTCATAAAAAATGCTCA  
CATGACAGAAACGTTTTCTTTCCACCTCCAG

>MC2R-Medaka-140c

GTACGTAAACAGGAAATACTTCAGAACATTTAGGATGCTCTTTTGCAAACCACTGATTAAGCAATGCA  
AATGTCCAGACCTTTATCATTAAACGCTCACATTTATTATGGAACCTTAGTCTGCTTCAGACATCTTAA  
ATCAGGTTTTTTCCAGATGACTGCAGAACTACTGCCAAAGTGATCAGAGAGACTGGGAGGAAGGGACT  
TGATGTATCATATAGAATGAGGAAAAGAAGATCAAGGGGACTTGGTGGTGGAATGAAGAAGCTCAGGA  
GTGCGTTAAAAGGAAAAGGTTGCTGTGAAAACATGACGCACTGAGAGGACAGAAGGAGGAGTAGAT  
ATAGCACAAAGCTGAAAGTGGAGGTGGCAAAGGCCAAACAGAGGGTGTATGAGGGCTTGTATGACATG  
TTGGAGGGAAGGAGAAGAGCAAGTGTGGATCTGAGATGGATCTGAACAGGTGATGCAGAGAAACA  
GAGGGAAGGATAAGCCGCAGGTTAGCGTGACCAAGGCCTCTGATGAAAATATGTTGACAGCTTTGGA  
AGGAGAACTTTGAAGACATTCTTAAAATGTTAGAGGGCACAAGGTTGAGGCAGGCAGTAGTACATTTT  
ACCAAGGATTCATCCTTTAAACTGAAGTCAGGAAGTCATTGAAGATGATGAAGACAGCCAACAACAA  
TCAAAGGTCAATAAAGATGCAGAACACAGTGCACCCTTTGAAAAAAGCATGCAAAGTTGCACCGGAA  
GAAATTTACAAAACAGCAAAGTGAAGATGAACCATGATATAGCGAAGACACATTGTAGAGGAAGGT  
AGACTGAGGTCAGAAGTGAACATTTGTGAGCCACAATGTTTTCATGAACTGAAAAGAACCACAGATG  
CAATATTTGCTTTGAGAATGCCTCTGGAGAAGAACAAGGTCAGAGGGATCTGTACTGTGCCTTTGTAG  
ATCAAGAGAAGGTCTATGACAGAGTGTGACAGGGAGCTGTGGTTTGGATGAGGAAGTCCATGTATAG  
AAATACGTTGGAGTTGTGCAGGACACGTATGAGGGCTGGAAGACAGTGGTGAGATGGGTTGTAGGTG  
TGAGAGAGGAGTTGAAGGTGGAGGTGGGACTACACTGAGGTCAACGTTGAACCTGTCTTGTTTGCTG  
TGGTGATGGACAGACTGACAGACGAGGTTAGACTGGAATTTCTGTAGACTATGATACTGAACAGTCCA  
GAAAGTGTAGTAAACAGGTGAAAAGGTGTCTGAAGCTAGTTGGAACGGGTGGAGGAATGTTTCAGGT  
GTGATGTGTGACTAAACAGTGTTAGAATAATGAAAGGTAAAGGTGTAGAAGACTATGGTGAGAGCAG  
CCATGTTGCTCTGATGCAGAGCTGGAGGCAGCAGAGATGAAGATGTTGAGGTTCTCTTTGGGAGAGAC  
CGGGATGGATCAGGAATGAATCCATCAGAAATCAGATCATACTAAATGTTCTGGAGATCAATGCAGA  
GAAGCAGATGGAGATGTTTGAACACGTGATGATGTTGGTGAAGGATGCTGAGGTTGGAGCTACCAG  
GAAAGAGAGGAAGACCAAAGAGGAGGTTTCATGGATGTAGAGGAGGACATGAGGGGGTGGTGTGAA  
TGAGGAGGATGCAGAGAAAGGATTAGAGGGACATGCACGATTTACTGTGGGAACCCTAATCAGAACA  
GCCAAGAGACAAAGAATAAGAAGATCAGATTTAATCATGTTTCATGACTGAAAGGTTTAAATTTTCAG  
GCTAGCGCACTTCTGAAGATTTTTTTGTGACAATCTGGAGTTGTGATCTCCAAAAACTGTTGAGGGCAG  
TAATAGCCCTTGAAATCATTTTCTTTCTGCCTTTCAG

5. Intron of MC2 receptor mapping to position 230c (only in *Takifugu*).

>MC2R-Takifugu-230c

GTGGGGCCATGGCATGAG

6. Intron of MC2 receptor mapping to position 236a (only in sickleback).

>MC2R-Sickleback-236a

GGCCGGCGGCGGCGGCGGCGGTGGGGCAGCGC
